# Supplementary material for: Which is the real oxidant in competitive ligand self-hydroxylation and substrate oxidation—a biomimetic iron(ii)-hydroperoxo species or an oxo-iron(iv)-hydroxy one?
Source: Royal Society of Chemistry journal article supplement (doi:10.1039/d2dt00797e), 2022-01-01
Supplement: d2dt00797e1.pdf [file d2dt00797e1.pdf]

## Electronic Supplementary Information for

# Which is the real oxidant in the competitive ligand self-hydroxylation and substrate oxidations, a biomimetic iron(II)-hydroperoxo species or an oxo-iron(IV)-hydroxy one?

Xuanyu Cao,<sup>a,d,#</sup> Huiling Song,<sup>c,#</sup> Xiao-Xi Li,<sup>b,\*</sup> Qing-An Qiao,<sup>c,\*</sup> Yufen Zhao,<sup>a,d</sup> and  
Yong Wang<sup>a,d\*</sup>

<sup>a</sup> Institute of Drug Discovery Technology, Ningbo University, Ningbo 315211, China

<sup>b</sup> Institute of Molecular Science and Engineering, Institute of Frontier and Interdisciplinary Sciences, Shandong University, Qingdao 266237, China

<sup>c</sup> School of Chemistry and Materials Science, Ludong University, Yantai 264025, China

<sup>d</sup> Qian Xuesen Collaborative Research Center of Astrochemistry and Space Life Sciences, Ningbo University, Ningbo 315211, China

# These authors contributed equally

\*Correspondence: [yong@nbu.edu.cn](mailto:yong@nbu.edu.cn), [lixiaoxi@sdu.edu.cn](mailto:lixiaoxi@sdu.edu.cn), [qiaoqa@163.com](mailto:qiaoqa@163.com)

## Table of Contents

|                                      |     |
|--------------------------------------|-----|
| Scheme S1                            | S3  |
| Table S1                             | S4  |
| Table S2                             | S5  |
| Table S3                             | S6  |
| Table S4                             | S7  |
| Table S5                             | S8  |
| Table S6                             | S9  |
| Table S7                             | S10 |
| Figure S1                            | S11 |
| Figure S2                            | S12 |
| Figure S3                            | S13 |
| Figure S4                            | S14 |
| DFT Calculated Cartesian Coordinates | S15 |

**Scheme S1** Possible reaction pathways of (a) sulfoxidation of thioanisole and (b) hydroxylation of cyclohexane mediated by Fe<sup>II</sup>-OOH species (**1**).

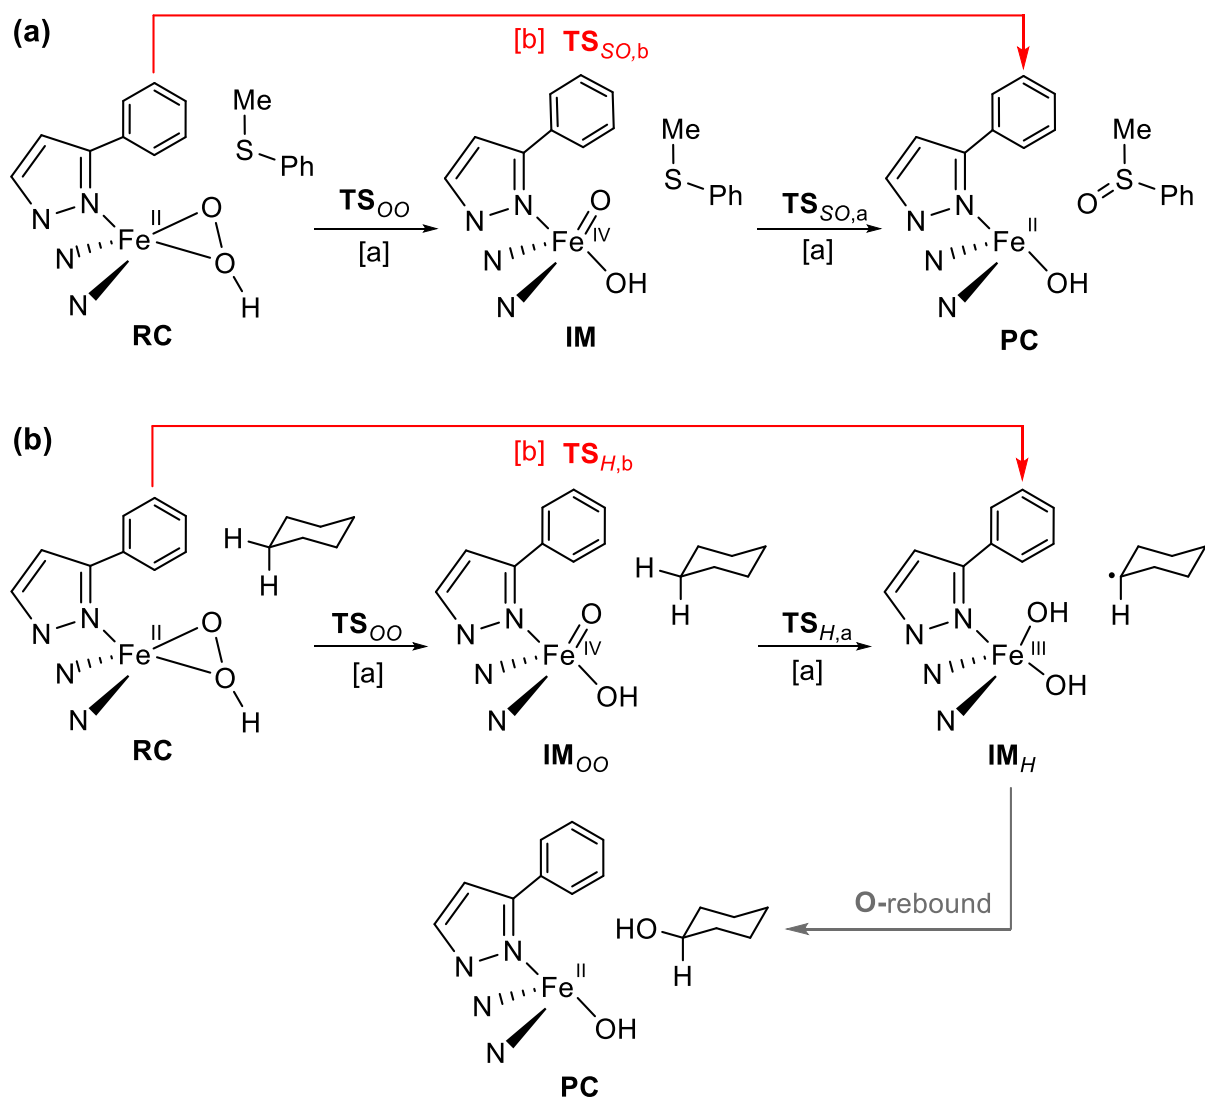

**Table S1** Relative energies (in kcal/mol) of the ligand self-hydroxylation of **1** in the absence of any external substrate calculated using UB3LYP functional in solvent

|                                          | $\Delta E(\text{B1})$ | $\Delta\Delta\text{BS}$ | $\Delta E(\text{B2})$ | $\Delta Z_0(\text{B1})$ | $\Delta E(\text{Thermal})^{[a]}$ | $-T\Delta S^{[a]}$ | $\Delta\text{Disp}^{[b]}$ | $\Delta G(\text{B2})^{[c]}$ |
|------------------------------------------|-----------------------|-------------------------|-----------------------|-------------------------|----------------------------------|--------------------|---------------------------|-----------------------------|
| <b><sup>5</sup>1</b>                     | 0.00                  | +0.00                   | <b>0.00</b>           | +0.00                   | +0.00                            | +0.00              | +0.00                     | <b>0.00</b>                 |
| <b><sup>3</sup>1</b>                     | 17.82                 | +1.16                   | <b>18.98</b>          | +0.50                   | -0.37                            | +0.99              | -1.30                     | <b>18.80</b>                |
| <b><sup>5</sup>TS<sub>12</sub></b>       | 18.97                 | +0.07                   | <b>19.04</b>          | -1.24                   | -0.24                            | +0.35              | -1.09                     | <b>16.83</b>                |
| <b><sup>3</sup>TS<sub>12</sub></b>       | 25.84                 | +0.78                   | <b>26.62</b>          | -0.50                   | -0.51                            | +1.36              | -1.40                     | <b>25.57</b>                |
| <b><sup>5</sup>2</b>                     | -16.17                | -0.53                   | <b>-16.70</b>         | +0.44                   | -0.40                            | +0.56              | -1.09                     | <b>-17.20</b>               |
| <b><sup>3</sup>2</b>                     | -3.37                 | -0.24                   | <b>-3.61</b>          | +0.69                   | -0.55                            | +1.52              | -2.57                     | <b>-4.51</b>                |
| <b><sup>5</sup>TS<sub>23</sub></b>       | 1.16                  | -1.83                   | <b>-0.66</b>          | -0.88                   | -0.74                            | +2.42              | -2.88                     | <b>-2.75</b>                |
| <b><sup>3</sup>TS<sub>23</sub></b>       | 4.89                  | -1.52                   | <b>3.36</b>           | -0.92                   | -0.69                            | +2.64              | -3.17                     | <b>1.23</b>                 |
| <b><sup>5</sup>3</b>                     | -8.70                 | -5.27                   | <b>-13.97</b>         | -0.37                   | -0.70                            | +2.47              | -2.82                     | <b>-15.39</b>               |
| <b><sup>3</sup>3</b>                     | -8.85                 | -5.45                   | <b>-14.30</b>         | -0.36                   | -0.72                            | +2.81              | -2.83                     | <b>-15.39</b>               |
| <b><sup>5</sup>TS<sub>34</sub></b>       | 5.89                  | -10.62                  | <b>-4.73</b>          | -3.93                   | -0.19                            | +0.65              | -0.33                     | <b>-8.52</b>                |
| <b><sup>3</sup>TS<sub>34</sub></b>       | 19.66                 | -10.82                  | <b>8.84</b>           | -3.15                   | -0.75                            | +2.43              | -1.75                     | <b>5.62</b>                 |
| <b><sup>5</sup>TS<sub>N-proton</sub></b> | 25.13                 | -7.81                   | <b>17.32</b>          | -4.88                   | +0.13                            | +0.69              | -3.95                     | <b>9.05</b>                 |
| <b><sup>3</sup>TS<sub>N-proton</sub></b> | 53.68                 | -7.24                   | <b>46.44</b>          | -4.47                   | -0.93                            | +3.48              | -4.45                     | <b>40.08</b>                |
| <b><sup>5</sup>4</b>                     | -37.90                | -6.85                   | <b>-44.75</b>         | -1.07                   | +0.18                            | -0.30              | +0.17                     | <b>-45.78</b>               |
| <b><sup>3</sup>4</b>                     | -22.79                | -6.73                   | <b>-29.52</b>         | -0.86                   | -0.51                            | +2.07              | -1.92                     | <b>-30.74</b>               |
| <b><sup>5</sup>TS<sub>4'5</sub></b>      | -29.59                | -7.44                   | <b>-37.03</b>         | -4.25                   | -1.09                            | +3.40              | -1.35                     | <b>-40.31</b>               |
| <b><sup>3</sup>TS<sub>4'5</sub></b>      | -12.92                | -6.60                   | <b>-19.52</b>         | -3.45                   | -1.45                            | +4.61              | -3.02                     | <b>-22.81</b>               |
| <b><sup>5</sup>5</b>                     | -66.69                | -9.02                   | <b>-75.72</b>         | +0.73                   | -0.41                            | +1.44              | -1.81                     | <b>-75.76</b>               |
| <b><sup>3</sup>5</b>                     | -53.83                | -8.28                   | <b>-62.11</b>         | +1.59                   | -0.77                            | +3.00              | -3.72                     | <b>-62.02</b>               |

Note: B1 represents a small basis set of LACVP(Fe), 6-31+G\*(O), 6-31G\*(B,N), 6-31G(C,H); B2 represents a larger basis set of LACV3P(Fe), 6-311+G\*\*(others). <sup>[a]</sup> Temperature is 298.15 K. <sup>[b]</sup> Grimme's D3-BJ corrections on the optimized structures. <sup>[c]</sup> Sum of the previous five columns.

**Table S2** Mulliken spin densities of various species involved the ligand self-hydroxylation of **1** in the absence of any external substrate calculated at the UB3LYP/LACVP(Fe), 6-31+G\*(O), 6-31G\*(B,N), 6-31G(C,H) level in solvent

|                                           | <b>Fe</b> | <b>O<sub>p</sub></b> | <b>O<sub>d</sub>H</b> | <b>H</b> | <b>C</b> | <b>T<sub>p</sub><sup>Ph,Me</sup></b> |                          |                           |
|-------------------------------------------|-----------|----------------------|-----------------------|----------|----------|--------------------------------------|--------------------------|---------------------------|
| <sup>5</sup> <b>1</b>                     | 3.78      | 0.12                 | 0.01                  | 0.00     | 0.00     | 0.10                                 |                          |                           |
| <sup>3</sup> <b>1</b>                     | 2.02      | -0.01                | -0.03                 | 0.00     | 0.00     | 0.01                                 |                          |                           |
| <sup>5</sup> <b>TS<sub>12</sub></b>       | 3.51      | 0.32                 | 0.07                  | 0.00     | 0.00     | 0.11                                 |                          |                           |
| <sup>3</sup> <b>TS<sub>12</sub></b>       | 2.22      | 0.04                 | -0.28                 | 0.00     | 0.00     | 0.02                                 |                          |                           |
| <sup>5</sup> <b>2</b>                     | 3.15      | 0.62                 | 0.10                  | 0.00     | 0.00     | 0.13                                 |                          |                           |
| <sup>3</sup> <b>2</b>                     | 1.40      | 0.61                 | 0.03                  | 0.00     | 0.00     | -0.03                                |                          |                           |
| <sup>5</sup> <b>TS<sub>23</sub></b>       | 2.90      | 0.47                 | 0.05                  | 0.03     | -0.15    | 0.69                                 |                          |                           |
| <sup>3</sup> <b>TS<sub>23</sub></b>       | 2.79      | -0.46                | 0.03                  | -0.03    | 0.15     | -0.48                                |                          |                           |
| <sup>5</sup> <b>3</b>                     | 2.85      | 0.07                 | 0.05                  | 0.06     | -0.08    | 1.05                                 |                          |                           |
| <sup>3</sup> <b>3</b>                     | 2.76      | 0.05                 | 0.05                  | -0.05    | 0.06     | -0.87                                |                          |                           |
| <sup>5</sup> <b>TS<sub>34</sub></b>       | 3.78      | 0.03                 | 0.14                  | 0.01     | 0.00     | 0.03                                 |                          |                           |
| <sup>3</sup> <b>TS<sub>34</sub></b>       | 2.18      | 0.00                 | 0.00                  | -0.03    | 0.01     | -0.15                                |                          |                           |
| <sup>5</sup> <b>TS<sub>N-proton</sub></b> | 3.73      | 0.04                 | 0.13                  | 0.00     | 0.00     | 0.09                                 |                          |                           |
| <sup>3</sup> <b>TS<sub>N-proton</sub></b> | 1.98      | -0.02                | -0.01                 | 0.00     | 0.00     | 0.04                                 |                          |                           |
| <sup>5</sup> <b>4</b>                     | 3.79      | -0.01                | 0.14                  | 0.00     | -0.01    | 0.09                                 |                          |                           |
| <sup>3</sup> <b>4</b>                     | 2.50      | 0.06                 | 0.04                  | -0.04    | -0.23    | -0.33                                |                          |                           |
|                                           | <b>Fe</b> | <b>O<sub>p</sub></b> | <b>O<sub>d</sub>H</b> | <b>H</b> | <b>C</b> | <b>T<sub>p</sub><sup>Ph,Me</sup></b> | <b>H(H<sub>2</sub>O)</b> | <b>OH(H<sub>2</sub>O)</b> |
| <sup>5</sup> <b>TS<sub>4'5</sub></b>      | 3.80      | 0.02                 | 0.05                  | 0.00     | 0.00     | 0.12                                 | 0.00                     | 0.01                      |
| <sup>3</sup> <b>TS<sub>4'5</sub></b>      | 2.00      | -0.03                | 0.01                  | 0.00     | 0.00     | 0.01                                 | 0.00                     | 0.00                      |
| <sup>5</sup> <b>5</b>                     | 3.78      | 0.06                 | 0.01                  | 0.00     | -0.01    | 0.16                                 | 0.00                     | 0.00                      |
| <sup>3</sup> <b>5</b>                     | 1.97      | 0.03                 | -0.02                 | 0.00     | -0.01    | 0.04                                 | 0.00                     | 0.00                      |

**Table S3** APT charges of various species involved the ligand self-hydroxylation of **1** in the absence of any external substrate calculated at the UB3LYP/LACVP(Fe), 6-31+G\*(O), 6-31G\*(B,N), 6-31G(C,H) level in solvent

|                                           | <b>Fe</b> | <b>O<sub>p</sub></b> | <b>O<sub>a</sub>H</b> | <b>H</b> | <b>C</b> | <b>Tp<sup>Ph,Me</sup></b> |                          |                           |
|-------------------------------------------|-----------|----------------------|-----------------------|----------|----------|---------------------------|--------------------------|---------------------------|
| <sup>5</sup> <b>1</b>                     | 1.74      | -0.65                | -0.22                 | 0.06     | -0.08    | -0.85                     |                          |                           |
| <sup>3</sup> <b>1</b>                     | 1.24      | -0.43                | -0.17                 | 0.04     | -0.06    | -0.62                     |                          |                           |
| <sup>5</sup> <b>TS<sub>12</sub></b>       | 0.99      | 0.16                 | -0.12                 | 0.06     | -0.11    | -0.98                     |                          |                           |
| <sup>3</sup> <b>TS<sub>12</sub></b>       | 0.71      | 0.30                 | -0.30                 | 0.07     | -0.09    | -0.68                     |                          |                           |
| <sup>5</sup> <b>2</b>                     | 2.07      | -0.70                | -0.56                 | 0.07     | -0.06    | -0.82                     |                          |                           |
| <sup>3</sup> <b>2</b>                     | 1.91      | -0.76                | -0.59                 | 0.09     | -0.07    | -0.59                     |                          |                           |
| <sup>5</sup> <b>TS<sub>23</sub></b>       | 1.67      | -0.20                | -0.61                 | 0.10     | -0.23    | -0.73                     |                          |                           |
| <sup>3</sup> <b>TS<sub>23</sub></b>       | 2.03      | -0.54                | -0.65                 | 0.11     | -0.23    | -0.72                     |                          |                           |
| <sup>5</sup> <b>3</b>                     | 2.05      | -0.90                | -0.64                 | -0.06    | 0.50     | -0.94                     |                          |                           |
| <sup>3</sup> <b>3</b>                     | 2.10      | -0.92                | -0.64                 | -0.06    | 0.48     | -0.95                     |                          |                           |
| <sup>5</sup> <b>TS<sub>34</sub></b>       | 1.56      | -0.79                | -0.90                 | 0.23     | 0.56     | -0.66                     |                          |                           |
| <sup>3</sup> <b>TS<sub>34</sub></b>       | 1.10      | -0.09                | -0.92                 | 0.58     | 0.00     | -0.66                     |                          |                           |
| <sup>5</sup> <b>TS<sub>N-proton</sub></b> | 1.72      | -1.13                | -0.83                 | 0.69     | 0.25     | -0.70                     |                          |                           |
| <sup>3</sup> <b>TS<sub>N-proton</sub></b> | 1.66      | -1.00                | -0.79                 | 0.66     | 0.20     | -0.73                     |                          |                           |
| <sup>5</sup> <b>4</b>                     | 1.74      | -0.87                | -0.86                 | 0.10     | 0.85     | -0.96                     |                          |                           |
| <sup>3</sup> <b>4</b>                     | 1.29      | 1.02                 | -0.78                 | 0.05     | -0.75    | -0.84                     |                          |                           |
|                                           | <b>Fe</b> | <b>O<sub>p</sub></b> | <b>O<sub>a</sub>H</b> | <b>H</b> | <b>C</b> | <b>Tp<sup>Ph,Me</sup></b> | <b>H(H<sub>2</sub>O)</b> | <b>OH(H<sub>2</sub>O)</b> |
| <sup>5</sup> <b>TS<sub>45</sub></b>       | 1.77      | -1.17                | -0.84                 | 0.81     | 0.85     | -1.30                     | 0.77                     | -0.90                     |
| <sup>3</sup> <b>TS<sub>45</sub></b>       | 1.35      | -1.06                | -0.77                 | 0.76     | 0.82     | -0.98                     | 0.73                     | -0.85                     |
| <sup>5</sup> <b>5</b>                     | 1.79      | -1.38                | -0.53                 | 0.62     | 0.71     | -1.16                     | 0.54                     | -0.60                     |
| <sup>3</sup> <b>5</b>                     | 1.41      | -1.32                | -0.46                 | 0.62     | 0.68     | -0.87                     | 0.54                     | -0.59                     |

**Table S4** Relative energies (in kcal/mol) of sulfide oxidation by **1** through both routes a and b calculated using UB3LYP functional in solvent

|                                      | $\Delta E(\text{B1})$ | $\Delta\Delta\text{BS}$ | $\Delta E(\text{B2})$ | $\Delta Z_0(\text{B1})$ | $\Delta E(\text{Thermal})^{[a]}$ | $-T\Delta S^{[a]}$ | $\Delta\text{Disp}^{[b]}$ | $\Delta G(\text{B2})^{[c]}$ |
|--------------------------------------|-----------------------|-------------------------|-----------------------|-------------------------|----------------------------------|--------------------|---------------------------|-----------------------------|
| <b><sup>5</sup>RC</b>                | 0.00                  | +0.00                   | <b>0.00</b>           | +0.00                   | +0.00                            | +0.00              | +0.00                     | <b>0.00</b>                 |
| <b><sup>3</sup>RC</b>                | 18.22                 | +2.01                   | <b>20.23</b>          | +0.90                   | -0.54                            | +3.75              | -1.86                     | <b>22.48</b>                |
| <b><sup>5</sup>TS<sub>OO</sub></b>   | 13.94                 | -0.46                   | <b>13.48</b>          | -1.02                   | -0.35                            | +2.49              | -1.11                     | <b>13.49</b>                |
| <b><sup>3</sup>TS<sub>OO</sub></b>   | 25.13                 | +1.84                   | <b>26.97</b>          | +0.05                   | -0.77                            | +4.31              | -2.09                     | <b>28.48</b>                |
| <b><sup>5</sup>IM</b>                | -16.32                | +0.94                   | <b>-15.38</b>         | +0.78                   | -0.62                            | +3.72              | -3.24                     | <b>-14.76</b>               |
| <b><sup>3</sup>IM</b>                | -1.43                 | +0.53                   | <b>-0.90</b>          | -0.03                   | -0.38                            | +3.61              | -4.55                     | <b>-2.26</b>                |
| <b><sup>5</sup>TS<sub>SO,a</sub></b> | -4.05                 | +1.22                   | <b>-2.83</b>          | -1.01                   | -0.70                            | +5.88              | -10.02                    | <b>-8.68</b>                |
| <b><sup>3</sup>TS<sub>SO,a</sub></b> | 2.80                  | +2.41                   | <b>5.21</b>           | +0.16                   | -1.27                            | 8.91               | -12.27                    | <b>0.74</b>                 |
| <b><sup>5</sup>TS<sub>SO,b</sub></b> | 19.52                 | +0.63                   | <b>20.15</b>          | -0.49                   | -0.85                            | +6.50              | -10.50                    | <b>14.82</b>                |
| <b><sup>3</sup>TS<sub>SO,b</sub></b> | 36.52                 | +1.15                   | <b>37.68</b>          | +0.05                   | -1.21                            | +8.67              | -12.99                    | <b>32.20</b>                |
| <b><sup>5</sup>PC</b>                | -36.60                | +3.00                   | <b>-33.60</b>         | +0.23                   | -0.63                            | +6.36              | -10.07                    | <b>-37.70</b>               |
| <b><sup>3</sup>PC</b>                | -12.80                | +3.22                   | <b>-9.58</b>          | +0.88                   | -1.02                            | +8.05              | -12.79                    | <b>-14.47</b>               |

Note: B1 represents a small basis set of LACVP(Fe), 6-31+G\*(O), 6-31G\*(B,N), 6-31G(C,H); B2 represents a larger basis set of LACV3P(Fe), 6-311+G\*\*(others). <sup>[a]</sup> Temperature is 298.15 K. <sup>[b]</sup> Grimme's D3-BJ corrections on the optimized structures. <sup>[c]</sup> Sum of the previous five columns.

**Table S5** Mulliken spin densities and APT charges of various species involved in the sulfoxidation by **1** through both routes a and b calculated at the UB3LYP/LACVP(Fe), 6-31+G\*(O), 6-31G\*(B,N), 6-31G(C,H) level in solvent

|                                 | Spin densities |                |                  |                     |       |       | APT charges |                |                  |                     |       |       |
|---------------------------------|----------------|----------------|------------------|---------------------|-------|-------|-------------|----------------|------------------|---------------------|-------|-------|
|                                 | Fe             | O <sub>p</sub> | O <sub>a</sub> H | Tp <sup>Ph,Me</sup> | S     | Sub-S | Fe          | O <sub>p</sub> | O <sub>a</sub> H | Tp <sup>Ph,Me</sup> | S     | Sub-S |
| <sup>5</sup> RC                 | 3.79           | 0.10           | 0.00             | 0.10                | 0.00  | 0.00  | 1.84        | -0.68          | -0.25            | -0.94               | -0.25 | 0.28  |
| <sup>3</sup> RC                 | 2.02           | -0.01          | -0.03            | 0.01                | 0.00  | 0.00  | 1.31        | -0.48          | -0.18            | -0.66               | -0.25 | 0.26  |
| <sup>5</sup> TS <sub>oo</sub>   | 3.95           | 0.22           | -0.36            | 0.19                | 0.00  | 0.00  | 1.35        | -0.13          | -0.30            | -0.95               | -0.25 | 0.28  |
| <sup>3</sup> TS <sub>oo</sub>   | 2.22           | 0.04           | -0.28            | 0.02                | 0.00  | 0.00  | 0.68        | 0.37           | -0.43            | -0.65               | -0.24 | 0.26  |
| <sup>5</sup> IM                 | 3.16           | 0.61           | 0.11             | 0.12                | 0.00  | 0.00  | 2.09        | -0.70          | -0.52            | -0.86               | -0.22 | 0.22  |
| <sup>3</sup> IM                 | 2.77           | -0.83          | 0.03             | 0.05                | -0.01 | 0.00  | 2.05        | -0.51          | -0.57            | -0.97               | -0.22 | 0.20  |
| <sup>5</sup> TS <sub>so,a</sub> | 3.99           | 0.07           | 0.23             | 0.14                | -0.37 | -0.07 | 1.92        | 0.10           | -0.63            | -1.19               | -0.31 | 0.12  |
| <sup>3</sup> TS <sub>so,a</sub> | 2.46           | -0.06          | -0.03            | 0.01                | -0.30 | -0.08 | 0.91        | 0.78           | -0.20            | -0.83               | -0.54 | -0.11 |
| <sup>5</sup> TS <sub>so,b</sub> | 3.79           | 0.10           | 0.04             | 0.08                | -0.01 | 0.00  | 1.66        | 0.51           | -1.15            | -0.87               | -0.22 | 0.07  |
| <sup>3</sup> TS <sub>so,b</sub> | 2.06           | -0.07          | 0.01             | 0.00                | 0.00  | 0.00  | 1.25        | 0.69           | -1.19            | -0.57               | -0.21 | 0.04  |
| <sup>5</sup> PC                 | 3.80           | -0.01          | 0.13             | 0.07                | 0.01  | 0.00  | 1.76        | -1.01          | -0.84            | -0.90               | 1.13  | -0.14 |
| <sup>3</sup> PC                 | 2.04           | -0.02          | -0.02            | -0.01               | 0.00  | 0.00  | 1.38        | -0.98          | -0.75            | -0.69               | 1.14  | -0.10 |



**Table S6** Relative energies (in kcal/mol) of cyclohexane hydroxylation by **1** through both routes a and b calculated using UB3LYP functional in solvent

|                                     | $\Delta E(\text{B1})$ | $\Delta\Delta\text{BS}$ | $\Delta E(\text{B2})$ | $\Delta Z_0(\text{B1})$ | $\Delta E(\text{Thermal})^{[a]}$ | $-T\Delta S^{[a]}$ | $\Delta\text{Disp}^{[b]}$ | $\Delta G(\text{B2})^{[c]}$ |
|-------------------------------------|-----------------------|-------------------------|-----------------------|-------------------------|----------------------------------|--------------------|---------------------------|-----------------------------|
| <b><sup>5</sup>RC</b>               | 0.00                  | +0.00                   | <b>0.00</b>           | +0.00                   | +0.00                            | +0.00              | +0.00                     | <b>0.00</b>                 |
| <b><sup>3</sup>RC</b>               | 17.56                 | +1.42                   | <b>19.06</b>          | +0.78                   | -1.07                            | +4.03              | -1.69                     | <b>21.12</b>                |
| <b><sup>5</sup>TS<sub>OO</sub></b>  | 14.05                 | -0.65                   | <b>13.40</b>          | -1.16                   | -0.26                            | +0.44              | -0.65                     | <b>11.782</b>               |
| <b><sup>3</sup>TS<sub>OO</sub></b>  | 24.62                 | +1.34                   | <b>25.96</b>          | -0.21                   | -0.65                            | +1.85              | -1.95                     | <b>25.00</b>                |
| <b><sup>5</sup>IM<sub>OO</sub></b>  | -16.33                | -0.37                   | <b>-16.70</b>         | +0.66                   | -0.49                            | +0.34              | -1.57                     | <b>-17.76</b>               |
| <b><sup>3</sup>IM<sub>OO</sub></b>  | -3.66                 | +0.30                   | <b>-3.36</b>          | +0.98                   | -0.70                            | +2.92              | -4.55                     | <b>-4.72</b>                |
| <b><sup>5</sup>TS<sub>H,a</sub></b> | 7.56                  | -2.09                   | <b>5.47</b>           | -3.43                   | -1.05                            | +5.51              | -7.13                     | <b>-0.63</b>                |
| <b><sup>3</sup>TS<sub>H,a</sub></b> | 9.74                  | -1.82                   | <b>7.92</b>           | -3.66                   | -0.95                            | +5.36              | -7.36                     | <b>1.32</b>                 |
| <b><sup>5</sup>TS<sub>H,b</sub></b> | 44.15                 | -0.42                   | <b>43.73</b>          | -1.93                   | -2.10                            | +8.91              | -9.07                     | <b>39.54</b>                |
| <b><sup>3</sup>TS<sub>H,b</sub></b> | 30.79                 | -2.04                   | <b>28.75</b>          | -2.73                   | -1.81                            | +7.94              | -6.54                     | <b>25.61</b>                |
| <b><sup>5</sup>IM<sub>H</sub></b>   | -3.15                 | -4.16                   | <b>-7.31</b>          | -1.56                   | -0.22                            | +2.26              | -4.87                     | <b>-11.69</b>               |
| <b><sup>3</sup>IM<sub>H</sub></b>   | -3.04                 | -4.19                   | <b>-7.23</b>          | -1.62                   | -0.18                            | +2.14              | -4.81                     | <b>-11.69</b>               |
| <b><sup>5</sup>PC</b>               | -55.18                | -6.34                   | <b>-61.52</b>         | +0.92                   | -0.57                            | +4.44              | -8.22                     | <b>-64.95</b>               |
| <b><sup>3</sup>PC</b>               | -36.96                | -5.84                   | <b>-42.80</b>         | +2.28                   | -1.22                            | +6.96              | -0.91                     | <b>-45.68</b>               |

Note: B1 represents a small basis set of LACVP(Fe), 6-31+G\*(O), 6-31G\*(B,N), 6-31G(C,H); B2 represents a larger basis set of LACV3P(Fe), 6-311+G\*\*(others). <sup>[a]</sup> Temperature is 298.15 K. <sup>[b]</sup> Grimme's D3-BJ corrections on the optimized structures. <sup>[c]</sup> Sum of the previous five columns.

**Table S7** Mulliken spin densities and APT charges of cyclohexane hydroxylation by **1** through both routes a and b calculated at the UB3LYP/LACVP(Fe), 6-31+G\*(O), 6-31G\*(B,N), 6-31G(C,H) level in solvent

|                                | Spin densities |                |                  |                     |       |       | APT charges |                |                  |                     |       |       |
|--------------------------------|----------------|----------------|------------------|---------------------|-------|-------|-------------|----------------|------------------|---------------------|-------|-------|
|                                | Fe             | O <sub>p</sub> | O <sub>d</sub> H | Tp <sup>Ph,Me</sup> | H     | Sub-H | Fe          | O <sub>p</sub> | O <sub>d</sub> H | Tp <sup>Ph,Me</sup> | H     | Sub-H |
| <sup>5</sup> RC                | 3.79           | 0.11           | 0.01             | 0.10                | 0.00  | 0.00  | 1.79        | -0.68          | -0.22            | -0.91               | -0.03 | 0.04  |
| <sup>3</sup> RC                | 2.03           | -0.01          | -0.03            | 0.01                | 0.00  | 0.00  | 1.28        | -0.47          | -0.16            | -0.67               | -0.04 | 0.06  |
| <sup>5</sup> TS <sub>oo</sub>  | 3.94           | 0.23           | -0.36            | 0.18                | 0.00  | 0.00  | 1.34        | -0.09          | -0.31            | -0.97               | -0.02 | 0.04  |
| <sup>3</sup> TS <sub>oo</sub>  | 2.23           | 0.03           | -0.28            | 0.02                | 0.00  | 0.00  | 0.71        | 0.36           | -0.41            | -0.68               | -0.04 | 0.06  |
| <sup>5</sup> IM1               | 3.16           | 0.61           | 0.10             | 0.13                | 0.00  | 0.00  | 2.07        | -0.71          | -0.55            | -0.82               | -0.03 | 0.05  |
| <sup>3</sup> IM1               | 1.40           | 0.61           | 0.02             | -0.03               | 0.00  | 0.00  | 1.91        | -0.76          | -0.58            | -0.58               | -0.04 | 0.06  |
| <sup>5</sup> TS <sub>H,a</sub> | 2.90           | 0.46           | 0.04             | 0.09                | -0.04 | 0.55  | 1.76        | -0.19          | -0.53            | -0.91               | -0.49 | 0.36  |
| <sup>3</sup> TS <sub>H,a</sub> | 2.84           | -0.49          | 0.05             | 0.07                | 0.04  | -0.51 | 2.21        | -0.53          | -0.59            | -1.03               | -0.42 | 0.36  |
| <sup>5</sup> TS <sub>H,b</sub> | 3.79           | 0.07           | 0.06             | 0.09                | 0.00  | -0.02 | 1.70        | 0.44           | -0.98            | -0.93               | -0.51 | 0.27  |
| <sup>3</sup> TS <sub>H,b</sub> | 2.05           | 0.01           | -0.07            | 0.00                | 0.00  | 0.02  | 1.06        | 0.72           | -0.88            | -0.63               | -0.53 | 0.26  |
| <sup>5</sup> IM2               | 2.86           | 0.05           | 0.04             | 0.08                | 0.01  | 0.96  | 2.04        | -0.94          | -0.57            | -0.86               | 0.33  | 0.01  |
| <sup>3</sup> IM2               | 2.84           | 0.01           | 0.04             | 0.08                | -0.02 | -0.96 | 2.06        | -0.96          | -0.59            | -0.85               | 0.34  | 0.00  |
| <sup>5</sup> PC                | 3.80           | -0.01          | 0.13             | 0.07                | 0.00  | 0.00  | 1.72        | -0.82          | -0.83            | -0.90               | 0.29  | 0.54  |
| <sup>3</sup> PC                | 2.00           | -0.02          | 0.03             | -0.01               | 0.00  | 0.00  | 1.35        | -0.77          | -0.77            | -0.66               | 0.30  | 0.55  |

(a)  $[\text{Fe}^{\text{II}}(\text{OOH})(\text{L})]$

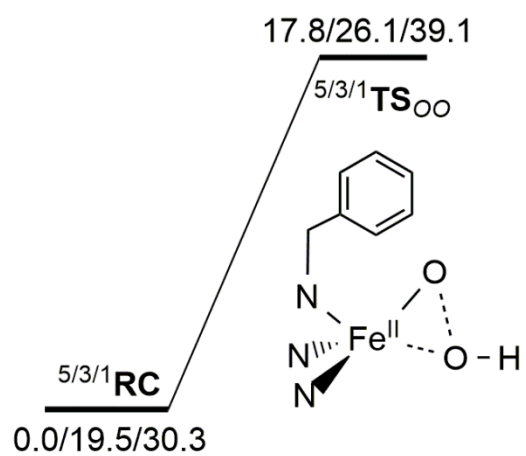

(b)  $[\text{Fe}^{\text{III}}(\text{OOH})(\text{L})]^+$

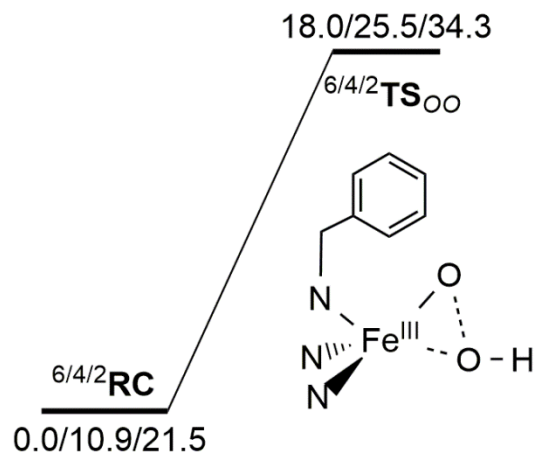

**Figure S1** Energy profiles for the O–O bond cleavage of (a)  $\text{Fe}^{\text{II}}\text{-OOH}$  and (b)  $\text{Fe}^{\text{III}}\text{-OOH}$  species with the same ligand framework.

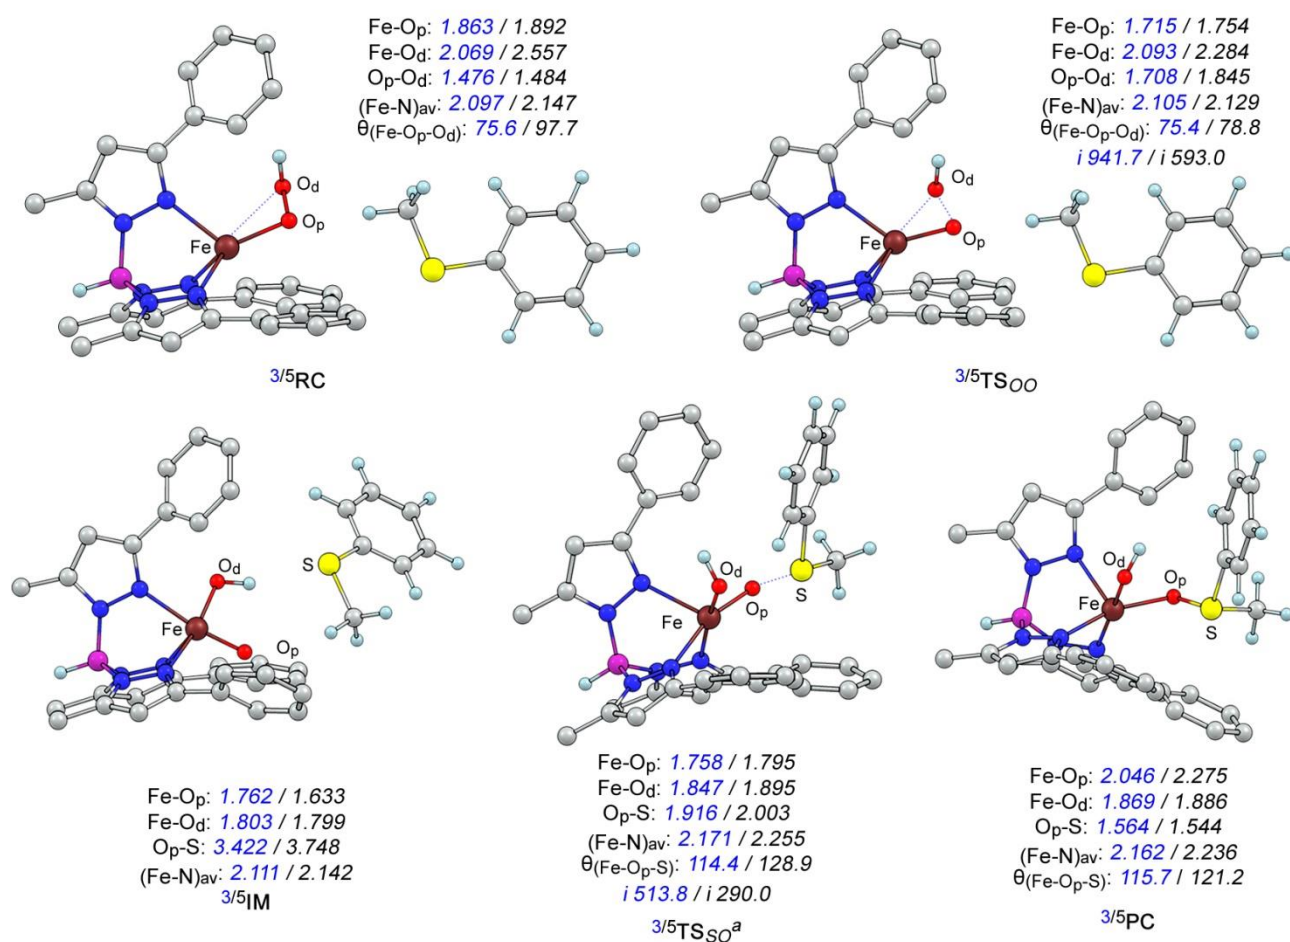

**Figure S2** Key geometric information for sulfoxidation by **1** through the preferred route a as shown in Scheme S1. Bond length is in Å, bond angle is in ° and imaginary frequency is in cm<sup>-1</sup> unit. All hydrogen atoms in the ligand except that attached to B and O atoms have been omitted for clarity. Calculations were done at the UB3LYP/LACVP(Fe), 6-31+G\*(O), 6-31G\*(B,N), 6-31G(C,H) level in solvent.

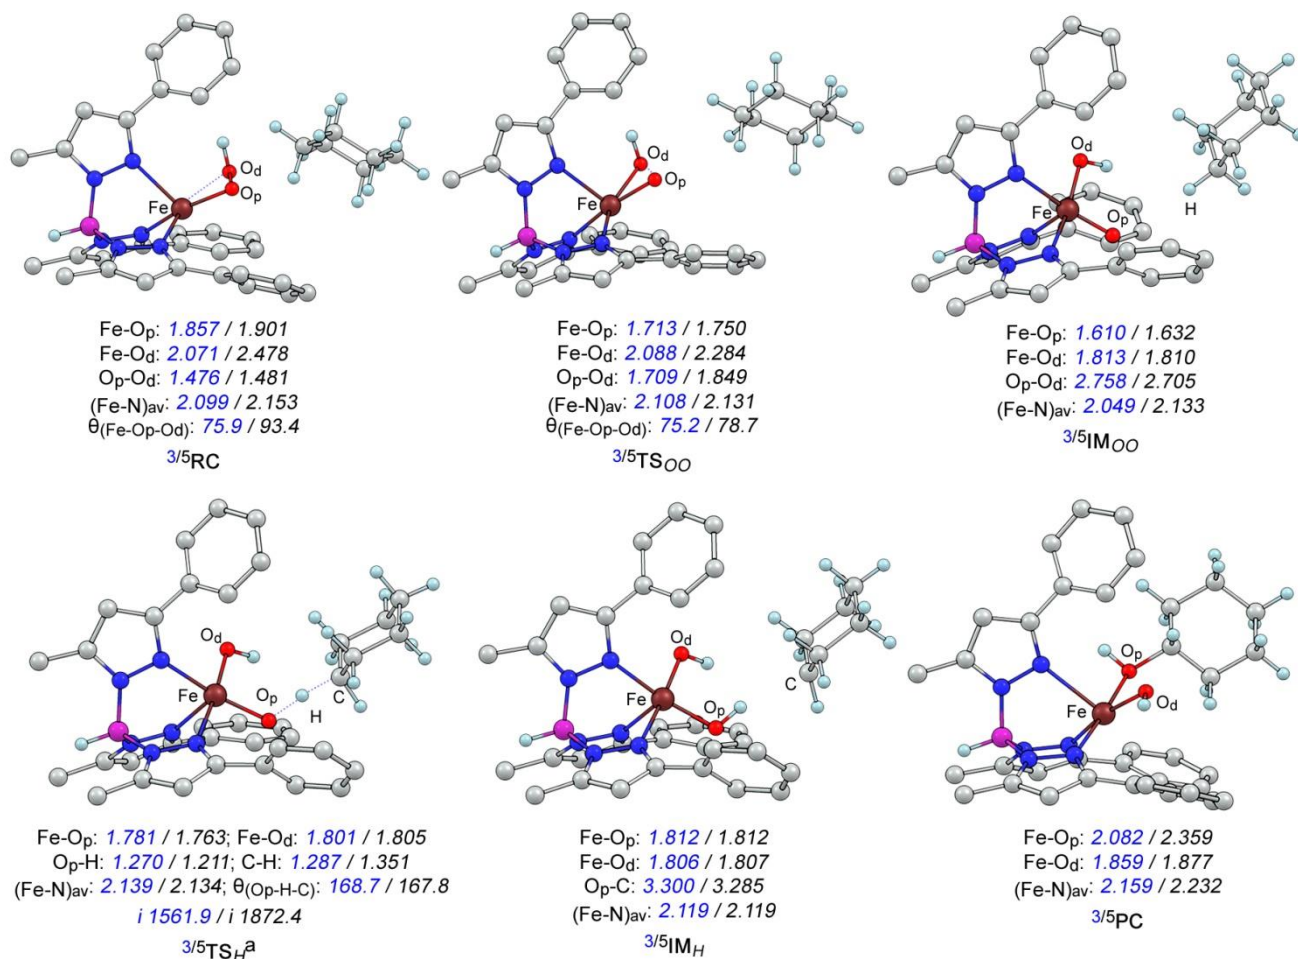

**Figure S3** Key geometric information for cyclohexane oxidation by **1** through the preferred route a as shown in Scheme S1. Bond length is in Å, bond angle is in ° and imaginary frequency is in cm<sup>-1</sup> unit. All hydrogen atoms in the ligand except that attached to B and O atoms have been omitted for clarity. Calculations were done at the UB3LYP/LACVP(Fe), 6-31+G\*(O), 6-31G\*(B,N), 6-31G(C,H) level in solvent.

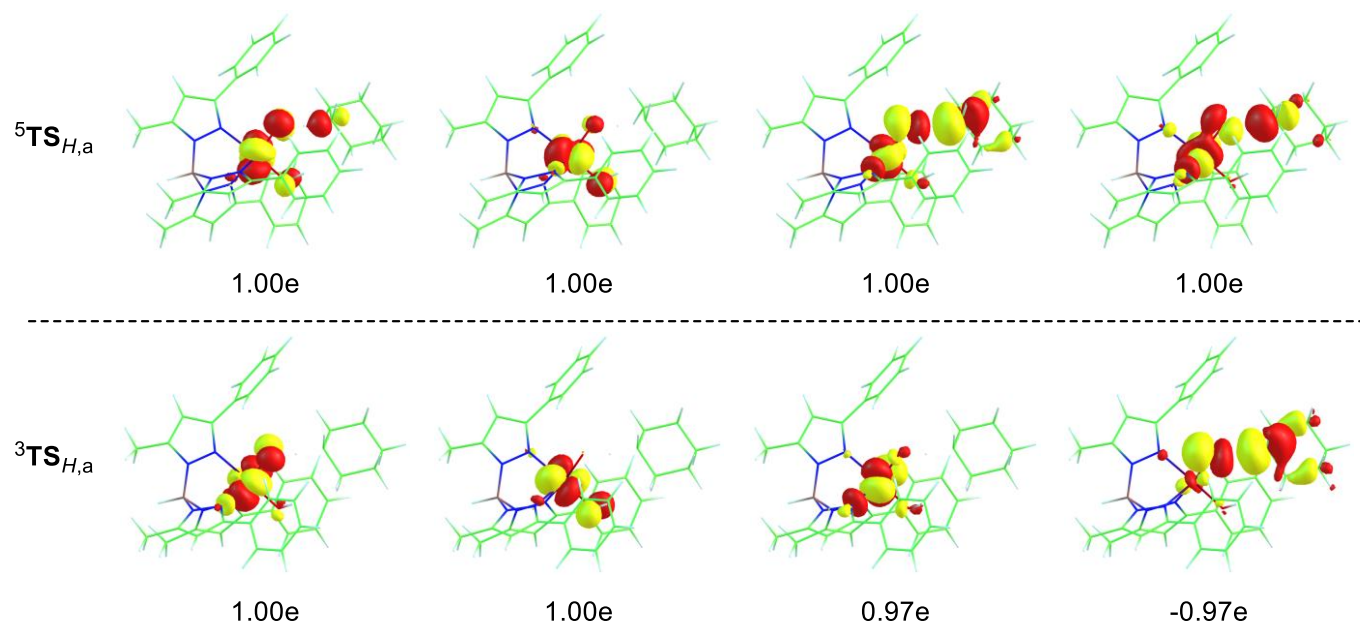

**Figure S4** Singly occupied spin-natural bond orbitals (SNOs) of both  ${}^5\text{TS}_{H,a}$  (top) and  ${}^3\text{TS}_{H,a}$  (bottom). Positive value means a spin-up electron and negative value means a spin-down electron.

# DFT Calculated Cartesian Coordinates

|                                     |                                 |                                |                                    |                                    |
|-------------------------------------|---------------------------------|--------------------------------|------------------------------------|------------------------------------|
| <b>I. Ligand self-hydroxylation</b> | H -1.247594 1.395481 -1.842921  | C -0.167872 0.334537 -0.188377 | H 0.897824 0.814891 5.474062       | C -2.754541 -0.253342 2.691156     |
| <b><sup>5</sup>I</b>                | H 5.997376 2.700928 1.733867    | C 3.718585 2.535271 3.095345   | C 2.276274 -3.321538 1.319274      | H -0.159751 0.466315 -2.883582     |
| Fe 3.835287 1.710255 -0.114445      | H 7.625534 4.553496 1.779739    | C 4.792887 3.543989 3.098023   | H 2.186826 -3.189470 2.403000      | H -0.554095 1.284514 3.531347      |
| N 1.122585 0.554423 0.243644        | H 7.208494 6.558989 3.197885    | C 6.056084 3.276165 2.537521   | H 1.265035 -3.267456 0.899966      | H 1.904730 1.661362 -1.953306      |
| N 1.744981 1.532195 -0.478847       | H 5.125198 6.693024 4.558132    | C 7.073995 4.232696 2.587540   | H 2.663425 -4.326264 1.131242      | H 2.427760 1.942922 -4.352918      |
| N 2.433846 0.850176 2.399836        | H 3.472602 4.852457 4.483801    | C 6.850157 5.469700 3.205067   | C -1.134515 -0.634865 0.419757     | H 1.280154 3.706330 -5.688109      |
| N 3.389398 1.756116 2.030860        | H 2.766075 2.553339 5.166117    | C 5.600655 5.743069 3.775515   | H -2.082483 -0.597403 -0.123356    | H -0.407487 5.175854 -4.596129     |
| N 3.054667 -1.011394 0.781957       | H 6.392809 0.920123 -0.585887   | C 4.581074 4.787999 3.724336   | H -0.764438 -1.665681 0.377691     | H -0.970616 4.862033 -2.205218     |
| N 4.039355 -0.409993 0.043954       | H 8.400119 1.250092 -1.960982   | C 2.861317 2.207317 4.169206   | H -1.337996 -0.405591 1.471549     | H -0.285077 5.132971 0.283138      |
| B 1.884515 -0.185171 1.385760       | H 9.292807 -0.608739 -3.361385  | C 2.057440 1.163163 3.722463   | <b><sup>5</sup>TS<sub>I2</sub></b> | H 1.464389 -2.991403 -0.316551     |
| C 0.863857 1.978133 -1.403242       | H 8.122424 -2.809197 -3.373118  | C 4.832384 -1.227870 -0.376413 | Fe 0.050442 -0.182741 -0.487950    | H 2.723403 -4.387584 -1.923330     |
| C 1.179687 3.070722 -2.337621       | H 6.086042 -3.139386 -2.016130  | C 6.039344 -0.894577 -1.150254 | N -0.250353 2.080214 1.445910      | H 5.207958 -4.249119 -2.025233     |
| C 1.972053 4.165966 -1.935548       | H 4.891352 -3.590113 -0.011012  | C 6.845514 0.211843 -0.820537  | N 0.061893 1.863296 0.134606       | H 6.418169 -2.684962 -0.510085     |
| C 2.268695 5.197479 -2.834596       | O 5.036785 3.063079 -0.712918   | C 7.990271 0.508534 -1.566902  | N 0.912862 0.029164 2.372695       | H 5.153699 -1.260636 1.072503      |
| C 1.767282 5.158541 -4.142778       | O 4.860007 2.661589 -2.129428   | C 8.357113 -0.303251 -2.646967 | N 1.275967 -0.640713 1.236027      | H 3.822426 -1.160228 3.259534      |
| C 0.964116 4.083945 -4.544516       | C 1.031202 0.240517 4.418799    | C 7.570817 -1.415294 -2.975572 | N -1.599935 0.003143 2.006350      | H -1.248995 -2.708019 -1.007487    |
| C 0.672930 3.048376 -3.651139       | H 0.044422 0.308540 3.946662    | C 6.422243 -1.708220 -2.235589 | N -1.642647 -0.582392 0.770912     | H -1.980106 -4.047815 -2.944918    |
| C -0.342578 1.258553 -1.273456      | H 1.304774 -0.819986 4.450026   | C 4.338850 -2.511571 -0.054912 | B -0.386457 0.872539 2.424383      | H -4.393153 -4.165880 -3.552111    |
| C -0.148022 0.365082 -0.221287      | H 0.935602 0.594516 5.448540    | C 3.191908 -2.306798 0.707664  | C 0.077708 3.066949 -0.484595      | H -6.066156 -2.907875 -2.201179    |
| C 3.624157 2.548106 3.099922        | C 2.387045 -3.320434 1.577178   | H 3.959491 3.071225 -2.098367  | C 0.412451 3.229847 -1.908871      | H -5.330109 -1.535539 -0.276883    |
| C 4.609917 3.642309 3.101302        | H 2.313142 -3.075450 2.642369   | H 1.106096 -0.883456 2.017585  | C 1.377173 2.411890 -2.532960      | H -4.525920 -1.441248 2.109323     |
| C 5.794456 3.574614 2.342690        | H 1.368068 -3.332686 1.174419   | H 2.269834 4.208280 -1.141196  | C 1.681923 2.580045 -3.888749      | O 0.890929 -1.016644 -1.884096     |
| C 6.720502 4.622154 2.374511        | H 2.794943 -4.330741 1.490451   | H 2.769647 5.885248 -2.892949  | C 1.040728 3.575001 -4.638019      | O -0.670751 -0.156008 -2.333335    |
| C 6.486985 5.748709 3.172458        | C -1.109396 -0.631435 0.348630  | H 1.927595 5.562866 -5.216577  | C 0.093506 4.402892 -4.022271      | C 1.814240 0.531033 4.684989       |
| C 5.316417 5.822578 3.938417        | H -2.063120 -0.565851 -0.181086 | H 0.588970 3.536523 -5.769344  | C -0.219898 4.231676 -2.670725     | H 1.763133 1.624986 4.642286       |
| C 4.386127 4.780558 3.902265        | H -0.739139 -1.658022 0.250029  | H 0.126452 1.836899 -4.029708  | C -0.242379 4.069568 0.454460      | H 0.933602 0.184940 5.237159       |
| C 2.794572 2.140564 4.170691        | H -1.299929 -0.454286 1.412750  | H -1.225873 1.238177 -1.908757 | C -0.443341 3.413195 1.667977      | H 2.702689 0.258823 5.260557       |
| C 2.054518 1.063029 3.698223        | <b><sup>3</sup>I</b>            | H 6.241103 2.312936 2.074846   | C 2.492410 -1.185472 1.463503      | C -3.034288 0.235178 4.079008      |
| C 4.886664 -1.382960 -0.369722      | Fe 3.904624 1.738027 0.109245   | H 8.042476 4.010537 2.150789   | C 3.216314 -2.015496 0.485743      | H -2.279150 -0.109696 4.793839     |
| C 6.086154 -1.140643 -1.189282      | N 1.087149 0.576530 0.298287    | H 7.641622 6.211306 3.243369   | C 2.543153 -2.910713 -0.368127     | H -3.057676 1.329535 4.132596      |
| C 6.757784 0.096982 -1.189600       | N 1.726435 1.514841 -0.460256   | H 5.418625 6.699510 4.255340   | C 3.258459 -3.705643 -1.270411     | H -4.007290 -0.137662 4.409018     |
| C 7.901973 0.286169 -1.971157       | N 2.425836 0.892168 2.434844    | H 3.609741 5.007922 4.155944   | C 4.655102 -3.629615 -1.326408     | C -0.795982 3.997484 3.000747      |
| C 8.403223 -0.757478 -2.757893      | N 3.430743 1.731502 2.044430    | H 2.859939 2.648866 5.152620   | C 5.335381 -2.751110 -0.472790     | H -0.862768 5.085265 2.919025      |
| C 7.746246 -1.994629 -2.762247      | N 3.022597 -0.956793 0.829494   | H 6.591082 0.828134 0.035591   | C 4.623010 -1.951400 0.424964      | H -1.760601 3.627402 3.365784      |
| C 6.599029 -2.183755 -1.988267      | N 4.014258 -0.295770 0.166716   | H 8.598004 1.366756 -1.299096  | C 2.913616 -0.849139 2.770258      | H -0.045955 3.760200 3.763056      |
| C 4.427360 -2.626223 0.118791       | B 1.849275 -0.145725 1.443060   | H 9.246969 -0.074133 -3.224196 | C 1.894593 -0.079542 3.319899      | <b><sup>3</sup>TS<sub>I2</sub></b> |
| C 3.269493 -2.359133 0.842160       | C 0.865793 1.877532 -1.438675   | H 7.848169 -2.049647 -3.811454 | C -2.829145 -1.225554 0.670959     | Fe 0.255016 -0.137818 -0.396006    |
| H 4.256511 3.359627 -2.449437       | C 1.176008 2.890000 -2.463303   | H 5.806071 -2.559559 -2.506603 | C -3.235973 -2.018118 -0.501483    | N -0.380515 2.188051 1.286835      |
| H 1.129395 -0.924006 1.939598       | C 1.922319 4.047259 -2.156947   | H 4.780225 -3.460438 -0.313430 | C -2.300864 -2.738806 -1.267957    | N 0.109854 1.848279 0.062401       |
| H 2.334521 4.220754 -0.913996       | C 2.195187 5.000182 -3.147469   | O 4.422912 3.481247 -0.259681  | C -2.716103 -3.502995 -2.362592    | N 0.633215 0.201749 2.450607       |
| H 2.875515 6.035903 -2.507739       | C 1.717931 4.822054 -4.451967   | O 4.688511 2.758727 -1.518752  | C -4.072393 -3.570302 -2.703468    | N 1.125105 -0.476334 1.369552      |
| H 1.995102 5.959842 -4.837898       | C 0.962873 3.683377 -4.760992   | C 0.983389 0.422820 4.457353   | C -5.012942 -2.864402 -1.942249    | N -1.820348 0.178572 1.821569      |
| H 0.571075 4.047703 -5.555410       | C 0.695678 2.725887 -3.778001   | H 0.006831 0.530169 3.971499   | C -4.599140 -2.095142 -0.851689    | N -1.731517 -0.467718 0.619008     |
| H 0.066988 2.208304 -3.974953       | C -0.339022 1.151370 -1.301633  | H 1.197596 -0.649612 4.524217  | C -3.558172 -1.033799 1.865805     | B -0.652516 1.057840 2.322216      |

|                                 |                                 |                                 |                                 |                                 |
|---------------------------------|---------------------------------|---------------------------------|---------------------------------|---------------------------------|
| C 0.193742 2.982562 -0.674978   | H -4.761668 -1.223229 1.680216  | C -4.609035 -2.815953 -3.088545 | N 1.764767 0.486236 -0.637677   | H 6.144492 -3.082930 0.501175   |
| C 0.731108 3.006312 -2.046033   | O 0.800935 -1.365459 -1.478521  | C -5.368068 -1.772546 -2.543665 | B 0.432456 2.598904 -0.252843   | H 5.151381 -0.812608 0.536850   |
| C 1.873303 2.255898 -2.395784   | O -0.198986 -0.317192 -2.400149 | C -4.883920 -1.049500 -1.450397 | C -0.640920 0.729006 2.687663   | H 4.891569 1.280699 -1.213734   |
| C 2.367234 2.281612 -3.705510   | C 1.188494 0.608411 4.883223    | C -4.006048 -0.100199 1.331949  | C -1.181554 -0.503808 3.285771  | O 0.066395 -1.606070 -1.349533  |
| C 1.739345 3.068383 -4.680149   | H 1.189830 1.703888 4.855466    | C -3.171623 0.570593 2.218583   | C -2.093380 -1.318890 2.588235  | O 0.861096 -1.567787 1.096815   |
| C 0.617977 3.833670 -4.336075   | H 0.221797 0.293902 5.291727    | H -0.552583 -0.505560 -2.702174 | C -2.630097 -2.460164 3.190334  | C -1.650572 4.423687 -1.836364  |
| C 0.116751 3.803014 -3.031052   | H 1.969033 0.287908 5.577976    | H -0.834329 1.757185 3.235979   | C -2.272928 -2.801294 4.501337  | H -1.691685 4.887871 -0.844367  |
| C -0.271349 4.063493 0.100469   | C -3.464542 0.531214 3.717243   | H 2.745774 0.968127 -1.429897   | C -1.376876 -1.989958 5.208115  | H -0.735556 4.776491 -2.324577  |
| C -0.628244 3.527123 1.338983   | H -2.796114 0.215507 4.526103   | H 3.987224 0.830378 -3.566317   | C -0.837923 -0.848637 4.606506  | H -2.504061 4.788590 -2.413269  |
| C 2.256186 -1.107598 1.766347   | H -3.477336 1.627272 3.715695   | H 3.532190 2.468744 -5.385934   | C -0.497057 1.983389 3.322897   | C 3.287866 3.801311 -1.010059   |
| C 3.085002 -1.974289 0.906672   | H -4.472902 0.185173 3.959125   | H 1.815051 4.240733 -5.049370   | C -0.048965 2.868419 2.345440   | H 2.684859 4.292342 -1.780976   |
| C 2.520488 -2.992584 0.114869   | C -1.175816 4.225338 2.544608   | H 0.547908 4.356278 -2.922648   | C -2.231007 0.751797 -1.907575  | H 3.106580 4.328777 -0.066895   |
| C 3.338028 -3.826550 -0.655552  | H -1.233848 5.299882 2.354281   | H 0.740924 4.963977 -0.346097   | C -2.974690 -0.492571 -2.206364 | H 4.341488 3.928975 -1.270157   |
| C 4.728677 -3.664376 -0.639746  | H -2.182700 3.873064 2.796058   | H 1.067378 -3.630265 0.561434   | C -2.414213 -1.553852 -2.940892 | C 0.247790 4.331708 2.458343    |
| C 5.300840 -2.663050 0.155225   | H -0.545662 4.069337 3.426843   | H 2.424571 -5.336148 -0.617594  | C -3.181451 -2.681070 -3.253280 | H 0.082883 4.662279 3.486876    |
| C 4.486020 -1.826190 0.923937   | <b>52</b>                       | H 4.889923 -5.054673 -0.816681  | C -4.517944 -2.765290 -2.843452 | H 1.286709 4.559317 2.193978    |
| C 2.488639 -0.811308 3.127158   | Fe 0.044204 -0.320498 -0.479725 | H 5.990035 -3.059777 0.191371   | C -5.088257 -1.710397 -2.120634 | H -0.394467 4.931787 1.803804   |
| C 1.444805 0.014538 3.532799    | N -0.123355 2.188218 1.137817   | H 4.628548 -1.361771 1.382310   | C -4.324190 -0.580977 -1.809287 | <b>5TS<sub>23</sub></b>         |
| C -2.912991 -1.097303 0.423902  | N 0.408569 1.709184 -0.023398   | H 3.022270 -1.427006 3.797332   | C -2.668372 2.054993 -2.236321  | Fe -0.079647 0.440178 -0.238064 |
| C -3.233979 -1.932309 -0.747776 | N 0.515462 0.145316 2.419929    | H -1.912576 -2.657258 -1.007129 | C -1.699091 2.929370 -1.756978  | N -0.961373 -2.360172 0.272674  |
| C -2.248533 -2.656442 -1.445410 | N 0.924740 -0.654034 1.387200   | H -2.771097 -3.939243 -2.941348 | C 3.051256 0.094339 -0.833050   | N -1.319890 -1.241001 -0.423879 |
| C -2.597602 -3.463896 -2.532935 | N -1.902089 0.481593 1.720594   | H -4.983334 -3.377507 -3.938644 | C 3.562471 -1.291564 -0.845453  | N -0.340686 -1.046471 2.302646  |
| C -3.933265 -3.571781 -2.938459 | N -1.898808 -0.224483 0.549956  | H -6.332312 -1.518228 -2.972440 | C 2.996527 -2.303576 -1.642689  | N -0.277473 0.202831 1.773364   |
| C -4.922204 -2.858302 -2.249349 | B -0.616344 1.183197 2.213267   | H -5.468941 -0.230515 -1.044485 | C 3.557468 -3.585426 -1.657978  | N 1.485397 -1.956129 0.817464   |
| C -4.576058 -2.046390 -1.166229 | C 0.818996 2.772632 -0.756130   | H -5.068678 -0.248646 1.434429  | C 4.690702 -3.873555 -0.887677  | N 1.696664 -0.853448 0.035838   |
| C -3.766237 -0.840078 1.524411  | C 1.545359 2.661794 -2.031425   | O 0.188893 -1.878020 -0.943567  | C 5.266759 -2.868926 -0.100147  | B 0.085158 -2.244017 1.412428   |
| C -3.046218 -0.029916 2.392681  | C 2.526382 1.671056 -2.227262   | O -0.457478 0.263993 -2.116568  | C 4.710169 -1.586892 -0.082420  | C -2.259940 -1.608818 -1.328243 |
| H 0.503869 0.158098 -2.884530   | C 3.234000 1.599923 -3.430402   | C 1.118012 0.644711 4.821586    | C 3.834255 1.251927 -1.007870   | C -2.965416 -0.665095 -2.210061 |
| H -0.924870 1.541100 3.379242   | C 2.981092 2.523745 -4.452624   | H 1.246069 1.728578 4.725762    | C 2.972340 2.342111 -0.902818   | C -3.350944 0.611061 -1.757278  |
| H 2.392484 1.680128 -1.635545   | C 2.017209 3.521757 -4.261833   | H 0.120787 0.469104 5.239452    | H 1.139862 -2.399450 0.679274   | C -4.050380 1.481472 -2.597971  |
| H 3.248814 1.701365 -3.958294   | C 1.306793 3.592661 -3.059865   | H 1.855433 0.279680 5.540718    | H 0.606459 3.777971 -0.305412   | C -4.385095 1.088271 -3.900111  |
| H 2.124239 3.089558 -5.694320   | C 0.513943 3.953458 -0.047375   | C -3.527035 1.268362 3.495295   | H -2.391381 -1.051661 1.579535  | C -4.017028 -0.183966 -4.355558 |
| H 0.128040 4.446908 -5.085388   | C -0.079694 3.550683 1.148188   | H -2.967975 0.869429 4.348671   | H -3.331343 -3.078657 2.639135  | C -3.315262 -1.054763 -3.516994 |
| H -0.765719 4.380201 -2.774816  | C 1.987366 -1.375748 1.828048   | H -3.324006 2.344302 3.446906   | H -2.691222 -3.687627 4.967631  | C -2.482213 -2.997138 -1.213540 |
| H -0.306259 5.101794 -0.187211  | C 2.750991 -2.373134 1.045740   | H -4.592971 1.137573 3.698627   | H -1.094190 -2.247220 6.224041  | C -1.646576 -3.443586 -0.190767 |
| H 1.446298 -3.135034 0.109925   | C 2.139962 -3.508125 0.481622   | C -0.581589 4.391140 2.280709   | H -0.131672 -0.230706 5.151928  | C -0.736761 1.073752 2.704812   |
| H 2.887490 -4.605497 -1.262086  | C 2.909178 -4.466177 -0.186264  | H -0.415388 5.447698 2.056521   | H -0.733952 2.219072 4.347775   | C -0.718351 2.502971 2.419982   |
| H 5.360373 -4.313823 -1.237320  | C 4.296626 -4.309083 -0.296916  | H -1.654897 4.247876 2.449607   | H -1.380106 -1.496061 -3.254069 | C 0.359592 2.993882 1.588441    |
| H 6.378169 -2.531967 0.174911   | C 4.915126 -3.188191 0.269832   | H -0.069031 4.158572 3.220661   | H -2.734793 -3.491888 -3.819915 | C 0.393665 4.403155 1.301264    |
| H 4.930699 -1.045093 1.532673   | C 4.148395 -2.230020 0.941577   | <b>32</b>                       | H -5.109351 -3.642194 -3.087241 | C -0.627215 5.237433 1.722263   |
| H 3.294276 -1.184293 3.738500   | C 2.253839 -1.014894 3.163786   | Fe 0.167104 -0.494845 -0.189502 | H -6.123872 -1.765267 -1.800105 | C -1.690792 4.728512 2.501631   |
| H -1.209730 -2.580837 -1.148563 | C 1.304410 -0.056929 3.512368   | N 0.072372 2.157279 1.187386    | H -4.767325 0.235897 -1.248113  | C -1.726810 3.369724 2.846429   |
| H -1.822639 -4.010451 -3.061165 | C -3.178045 -0.587550 0.294676  | N -0.273462 0.853789 1.391344   | H -3.563585 2.311539 -2.779259  | C -1.121379 0.349004 3.851615   |
| H -4.200448 -4.201423 -3.781280 | C -3.630153 -1.354802 -0.881453 | N -0.729491 2.167695 -1.170898  | H 2.116153 -2.088767 -2.234713  | C -0.851391 -0.992010 3.566414  |
| H -5.960571 -2.929055 -2.558227 | C -2.877558 -2.409455 -1.432053 | N -1.046096 0.842137 -1.257557  | H 3.110229 -4.356767 -2.276834  | C 2.978269 -0.906733 -0.393896  |
| H -5.346550 -1.482539 -0.650316 | C -3.364328 -3.129043 -2.528770 | N 1.723158 1.851558 -0.677913   | H 5.121551 -4.869593 -0.902167  | C 3.612368 0.112751 -1.247697   |



|                                    |                                 |                                 |                                 |                                 |
|------------------------------------|---------------------------------|---------------------------------|---------------------------------|---------------------------------|
| C 3.209899 1.462144 -1.226708      | N -0.220296 0.376860 1.751811   | H 3.654215 3.070507 -2.305084   | C 2.949548 -0.954941 -0.385298  | N -1.390168 -1.195945 -0.345896 |
| C 3.850828 2.407053 -2.034208      | N 1.375650 -1.982481 0.931871   | H 5.366627 2.161233 -3.868904   | C 3.583158 0.061242 -1.242342   | N -0.330887 -0.935685 2.355188  |
| C 4.908212 2.026699 -2.869635      | N 1.622390 -0.954752 0.065798   | H 5.902642 -0.271853 -3.826419  | C 3.242444 1.424796 -1.156417   | N -0.247601 0.274769 1.746090   |
| C 5.319436 0.688165 -2.894951      | B -0.013180 -2.117038 1.601434  | H 4.728917 -1.774897 -2.252676  | C 3.880447 2.369140 -1.966457   | N 1.372150 -2.032646 0.856259   |
| C 4.677960 -0.259058 -2.092723     | C -2.391452 -1.582332 -1.132493 | H 4.421660 -2.690211 0.000295   | C 4.874292 1.971918 -2.869567   | N 1.623139 -0.961363 0.044511   |
| C 3.590064 -2.072265 0.124655      | C -3.054522 -0.686010 -2.094001 | O 0.006638 2.211307 -0.284069   | C 5.225301 0.619062 -2.958794   | B -0.019959 -2.200910 1.514747  |
| C 2.621135 -2.714543 0.886857      | C -3.379270 0.641202 -1.755189  | O 0.013444 0.394350 -2.081998   | C 4.586420 -0.327008 -2.152892  | C -2.371527 -1.538959 -1.216127 |
| H 0.147684 1.527668 -2.248835      | C -4.041494 1.465551 -2.669386  | C -0.878034 -1.733097 4.675876  | C 3.550021 -2.130890 0.121502   | C -3.017923 -0.596254 -2.143884 |
| H 0.107098 -3.251788 2.052898      | C -4.399847 0.974889 -3.931356  | H -1.641813 -2.447879 4.350333  | C 2.583704 -2.755511 0.902820   | C -3.333063 0.718327 -1.750662  |
| H -3.114024 0.915661 -0.743313     | C -4.093259 -0.348400 -4.272756 | H 0.050784 -2.294064 4.827726   | H 0.222317 1.518465 -2.179053   | C -3.978932 1.587753 -2.634211  |
| H -4.339899 2.462309 -2.234322     | C -3.428571 -1.173329 -3.360914 | H -1.187488 -1.323223 5.640396  | H 0.072745 -3.223500 2.133018   | C -4.329603 1.155622 -3.919621  |
| H -4.929355 1.764706 -4.551375     | C -2.704332 -2.933379 -0.875971 | C 2.521537 -4.035392 1.870912   | H -3.100549 0.925369 -0.797097  | C -4.032435 -0.154594 -4.315265 |
| H -4.270742 -0.495749 -5.363786    | C -1.876461 -3.334946 0.171540  | H 2.362738 -3.796826 2.928467   | H -4.272440 2.447507 -2.354542  | C -3.384465 -1.024818 -3.433902 |
| H -3.015109 -2.032384 -3.880319    | C -0.533377 1.350586 2.640358   | H 1.767327 -4.778746 1.588410   | H -4.808937 1.701598 -4.669300  | C -2.698655 -2.896206 -1.016374 |
| H -3.191064 -3.588235 -1.770470    | C -0.442968 2.752522 2.250283   | H 3.504966 -4.502621 1.774291   | H -4.152316 -0.583131 -5.412276 | C -1.883220 -3.347649 0.020883  |
| H 1.311112 2.475950 1.660555       | C 0.595540 3.123060 1.327511    | C -1.799352 -4.666255 0.852149  | H -2.950230 -2.096567 -3.861567 | C -0.588946 1.232075 2.650162   |
| H 1.228914 4.794360 0.730738       | C 0.708312 4.496869 0.944317    | H -2.539378 -5.344062 0.419437  | H -3.236333 -3.587623 -1.685954 | C -0.515712 2.627794 2.293957   |
| H -0.601869 6.294045 1.475812      | C -0.216967 5.428909 1.384277   | H -0.812076 -5.127535 0.735040  | H 1.234487 2.702781 1.500123    | C 0.360582 2.971873 1.101208    |
| H -2.482121 5.391130 2.835575      | C -1.252759 5.042701 2.264856   | H -1.997494 -4.587711 1.926755  | H 0.721975 4.756215 0.038291    | C 0.341347 4.438467 0.760171    |
| H -2.552889 2.981807 3.434370      | C -1.357197 3.714324 2.694878   | <b>53</b>                       | H -0.636663 6.355216 1.353172   | C -0.308054 5.365928 1.523212   |
| H -1.498928 0.747301 4.779388      | C -0.858535 0.752024 3.875074   | Fe -0.081961 0.406907 -0.224801 | H -2.012910 5.559484 3.276010   | C -1.045536 4.977026 2.683854   |
| H 2.392516 1.772829 -0.586276      | C -0.700471 -0.622492 3.688424  | N -0.991255 -2.352748 0.336707  | H -2.097071 3.154126 3.853615   | C -1.143753 3.621532 3.036024   |
| H 3.525132 3.442340 -2.007000      | C 2.874232 -1.127674 -0.414676  | N -1.313290 -1.248942 -0.401721 | H -1.450548 0.873144 4.765453   | C -0.915182 0.589038 3.869758   |
| H 5.404354 2.762882 -3.494036      | C 3.530007 -0.211958 -1.363888  | N -0.334883 -1.004257 2.332501  | H 2.478374 1.746605 -0.458216   | C -0.734961 -0.774907 3.651175  |
| H 6.133972 0.380515 -3.543165      | C 3.238359 1.165431 -1.394683   | N -0.282744 0.225465 1.758443   | H 3.604416 3.416077 -1.888080   | C 2.877529 -1.108267 -0.438778  |
| H 4.989947 -1.297497 -2.134872     | C 3.893971 2.011763 -2.294196   | N 1.461050 -1.977021 0.854180   | H 5.368893 2.707184 -3.496189   | C 3.539545 -0.138652 -1.327676  |
| H 4.612022 -2.387034 -0.010377     | C 4.858234 1.502042 -3.172551   | N 1.677152 -0.880339 0.066663   | H 5.990901 0.299936 -3.658943   | C 3.270736 1.241654 -1.255204   |
| O 0.034191 2.189931 -0.052283      | C 5.160789 0.134930 -3.146399   | B 0.063374 -2.230012 1.470553   | H 4.849778 -1.375983 -2.241847  | C 3.935036 2.140288 -2.095487   |
| O 0.011888 0.588221 -2.036608      | C 4.503406 -0.713464 -2.251475  | C -2.255876 -1.620962 -1.302607 | H 4.564239 -2.461985 -0.032196  | C 4.884252 1.679614 -3.016311   |
| C -1.033961 -2.195627 4.436981     | C 3.430866 -2.295928 0.157723   | C -2.928702 -0.690231 -2.223431 | O -0.049978 2.235046 -0.044896  | C 5.163813 0.309435 -3.092589   |
| H -1.713423 -2.925497 3.983255     | C 2.458761 -2.814134 1.005955   | C -3.313566 0.599263 -1.809710  | O 0.060641 0.573073 -2.009816   | C 4.498413 -0.590884 -2.256300  |
| H -0.083752 -2.707386 4.626069     | H 0.341367 1.265462 -2.366342   | C -3.983106 1.455999 -2.688014  | C -0.982464 -2.071970 4.522191  | C 3.430328 -2.305372 0.072678   |
| H -1.454247 -1.895245 5.399850     | H -0.032321 -3.061696 2.331622  | C -4.288034 1.035579 -3.988870  | H -1.671412 -2.817506 4.110096  | C 2.454411 -2.866979 0.889250   |
| C 2.734817 -3.988446 1.666559      | H -3.124338 1.022921 -0.772135  | C -3.921009 -0.250233 -4.405430 | H -0.027859 -2.576696 4.708064  | H 0.232714 1.448459 -2.216461   |
| H 2.511268 -3.839899 2.728794      | H -4.283479 2.487036 -2.393649  | C -3.249282 -1.107599 -3.529314 | H -1.381226 -1.736998 5.482763  | H -0.041337 -3.176890 2.202393  |
| H 2.051089 -4.760307 1.295245      | H -4.915220 1.615727 -4.639625  | C -2.516352 -2.997611 -1.142389 | C 2.687535 -4.029527 1.683484   | H -3.084347 1.054609 -0.749535  |
| H 3.753517 -4.376589 1.586862      | H -4.366151 -0.735973 -5.249190 | C -1.701931 -3.431536 -0.096857 | H 2.488393 -3.873563 2.749526   | H -4.214271 2.598597 -2.316687  |
| C -1.488627 -4.827460 0.358398     | H -3.176277 -2.192462 -3.635852 | C -0.730767 1.135781 2.660927   | H 1.980841 -4.788080 1.328021   | H -4.832013 1.831577 -4.604150  |
| H -2.169893 -5.508245 -0.158095    | H -3.464946 -3.524629 -1.359562 | C -0.722370 2.543679 2.330803   | H 3.696225 -4.438701 1.584649   | H -4.299619 -0.496813 -5.310038 |
| H -0.468947 -5.205856 0.223091     | H 1.487023 2.507097 1.293921    | C 0.196398 2.954885 1.194847    | C -1.587109 -4.799763 0.500046  | H -3.139472 -2.033655 -3.750320 |
| H -1.713061 -4.870065 1.429889     | H 1.522164 4.790690 0.290633    | C 0.131684 4.424956 0.886766    | H -2.281896 -5.478895 -0.000250 | H -3.460649 -3.460272 -1.529346 |
| <b><sup>3</sup>TS<sub>23</sub></b> | H -0.137519 6.464926 1.071501   | C -0.625473 5.301129 1.614205   | H -0.576920 -5.209859 0.388426  | H 1.402904 2.693670 1.371206    |
| Fe -0.099299 0.421177 -0.280182    | H -1.970406 5.779313 2.610343   | C -1.418002 4.850537 2.710855   | H -1.822985 -4.799572 1.569892  | H 0.882432 4.720456 -0.137523   |
| N -1.109108 -2.261962 0.513742     | H -2.161742 3.420787 3.361652   | C -1.456771 3.483008 3.039732   | <b>33</b>                       | H -0.282624 6.414703 1.242503   |
| N -1.407146 -1.194137 -0.284752    | H -1.123100 1.252493 4.792329   | C -1.086404 0.446959 3.844950   | Fe -0.078434 0.400523 -0.229607 | H -1.558136 5.728143 3.274624   |
| N -0.315376 -0.817499 2.393838     | H 2.496645 1.575268 -0.718972   | C -0.819850 -0.900924 3.604716  | N -1.108179 -2.297318 0.411893  | H -1.748858 3.341404 3.893874   |

|                                 |                                 |                                 |                                 |                                 |
|---------------------------------|---------------------------------|---------------------------------|---------------------------------|---------------------------------|
| H -1.199402 1.056248 4.798371   | C 0.368118 2.153914 3.414129    | Fe 0.161160 0.369863 -0.294343  | H 0.052849 6.235610 2.967900    | C -2.501372 5.463893 0.706213   |
| H 2.542066 1.612352 -0.543577   | C 0.463372 0.794943 3.676158    | N -1.443335 -1.984113 0.856222  | H -0.046296 3.948206 3.831434   | C -1.806123 4.457941 1.476075   |
| H 3.714622 3.201000 -2.026903   | C 2.774190 -1.520537 -0.450256  | N -1.609625 -1.024347 -0.098824 | H -0.390662 1.818298 4.681045   | C -0.796780 2.196706 3.310530   |
| H 5.399496 2.379420 -3.666451   | C 3.406821 -0.960843 -1.657767  | N -0.121520 -0.549661 2.444867  | H 3.181312 1.073453 -0.428022   | C -0.145343 1.012691 3.643780   |
| H 5.894291 -0.058601 -3.806125  | C 3.416487 0.426262 -1.905211   | N -0.025490 0.538963 1.656235   | H 4.654893 2.362317 -1.948610   | C 3.204648 -0.305855 -0.320161  |
| H 4.705991 -1.653114 -2.334978  | C 4.058623 0.944058 -3.033969   | N 1.091568 -2.142385 0.923938   | H 5.773457 1.229235 -3.863094   | C 3.588059 0.361004 -1.576844   |
| H 4.421927 -2.690600 -0.101163  | C 4.709905 0.088303 -3.931563   | N 1.479830 -1.174689 0.038678   | H 5.410293 -1.206879 -4.235984  | C 3.037560 1.604175 -1.946977   |
| O 0.033247 2.231757 -0.100828   | C 4.712551 -1.291735 -3.692698  | B -0.191814 -1.950592 1.766461  | H 3.931737 -2.489538 -2.716430  | C 3.438067 2.237657 -3.127777   |
| O 0.031309 0.515735 -2.021512   | C 4.067486 -1.811644 -2.566647  | C -2.729698 -1.339146 -0.784950 | H 3.831646 -3.458387 -0.263062  | C 4.402211 1.647209 -3.954392   |
| C -0.905834 -1.913744 4.606730  | C 3.244746 -2.608497 0.323033   | C -3.271111 -0.524055 -1.885348 | O -0.365712 2.262885 -0.425548  | C 4.963559 0.416228 -3.591590   |
| H -1.653750 -2.631642 4.252352  | C 2.371585 -2.717725 1.398742   | C -3.052931 0.865984 -1.955705  | O 0.485893 0.310373 -2.110264   | C 4.560468 -0.221163 -2.414620  |
| H 0.030565 -2.463384 4.753851   | H 0.966700 -0.447289 -2.704944  | C -3.596066 1.617376 -3.002609  | C -0.430941 -1.157116 4.880038  | C 4.050829 -1.030466 0.551240   |
| H -1.233036 -1.535638 5.578270  | H 0.321805 -2.000311 3.189538   | C -4.371747 1.000651 -3.992328  | H -1.333412 -1.768370 4.766192  | C 3.256459 -1.410946 1.627546   |
| C 2.513469 -4.132173 1.688703   | H -2.779536 0.727968 -1.339599  | C -4.598573 -0.379922 -3.928764 | H 0.421346 -1.842984 4.937316   | H 1.008790 0.024783 -2.748618   |
| H 2.350763 -3.949328 2.756666   | H -4.074002 1.280774 -3.363147  | C -4.053364 -1.134389 -2.886446 | H -0.502048 -0.623745 5.831340  | H 0.999370 -1.548654 3.303890   |
| H 1.759771 -4.858778 1.364416   | H -5.472724 -0.452290 -4.478606 | C -3.283104 -2.530355 -0.254451 | C 1.836492 -4.413829 1.751899   | H -2.702699 -0.512054 -1.444949 |
| H 3.496920 -4.594404 1.571183   | H -5.545689 -2.762231 -3.545665 | C -2.444330 -2.915054 0.784929  | H 1.816992 -4.171924 2.820426   | H -4.056947 -0.598803 -3.504696 |
| C -1.824236 -4.705593 0.648551  | H -4.221451 -3.330192 -1.534500 | C -0.127116 1.640440 2.453110   | H 0.919572 -4.971050 1.527642   | H -4.635252 -2.789652 -4.539634 |
| H -2.564908 -5.359381 0.181426  | H -3.958308 -3.236955 0.924328  | C -0.055186 2.973751 1.920960   | H 2.684509 -5.079589 1.571291   | H -3.823655 -4.898781 -3.488607 |
| H -0.839434 -5.170070 0.523789  | H 0.465347 3.689557 -0.767803   | C -0.034703 3.186172 0.452967   | C -2.556159 -4.099995 1.694555  | H -2.442126 -4.812154 -1.439179 |
| H -2.033681 -4.667972 1.723231  | H -1.195396 4.480184 -1.920044  | C 0.029691 4.592094 -0.003490   | H -3.461164 -4.663878 1.453343  | H -2.257560 -4.549248 0.982514  |
| <sup>5</sup> TS <sub>34</sub>   | H -0.807449 6.738536 -0.872504  | C 0.074245 5.664893 0.891379    | H -1.701440 -4.778665 1.592325  | H -2.310175 3.899456 -2.103181  |
| Fe -0.134766 0.319861 -0.609540 | H -0.007325 6.853895 1.484269   | C 0.031813 5.409576 2.265841    | H -2.612449 -3.805442 2.748631  | H -3.792641 3.383767 -1.361033  |
| N -1.110319 -1.739218 1.478400  | H 0.441087 4.818157 2.767265    | C -0.016150 4.098029 2.758040   | <sup>5</sup> 4                  | H -3.514970 5.925436 -1.109391  |
| N -1.472472 -1.166929 0.289089  | H 0.450548 2.948373 4.137717    | C -0.278395 1.207598 3.800350   | Fe -0.122477 0.236107 -0.573351 | H -2.624403 6.448789 1.142778   |
| N 0.273215 0.139474 2.480749    | H 2.919605 1.090547 -1.207123   | C -0.279608 -0.176937 3.760074  | N -0.319397 -1.980806 1.535429  | H -1.443391 4.744633 2.458623   |
| N 0.062430 1.013419 1.486653    | H 4.053915 2.015039 -3.210889   | C 2.630362 -1.595698 -0.535703  | N -0.848360 -1.643894 0.318972  | H -1.153557 2.943914 4.000861   |
| N 1.427615 -1.736843 1.248626   | H 5.208411 0.492025 -4.807015   | C 3.448109 -0.797922 -1.466858  | N 0.098821 0.341112 2.477026    | H 2.303546 2.073928 -1.301747   |
| N 1.660466 -1.008181 0.118073   | H 5.210358 -1.963060 -4.385368  | C 3.665463 0.577337 -1.262250   | N -0.369872 1.050015 1.420158   | H 3.001287 3.193734 -3.398392   |
| B 0.234426 -1.391785 2.165782   | H 4.059090 -2.883410 -2.395337  | C 4.496249 1.301969 -2.120591   | N 1.996614 -0.934539 1.384716   | H 4.712849 2.140607 -4.869735   |
| C -2.657914 -1.711292 -0.068570 | H 4.125226 -3.204512 0.143498   | C 5.129034 0.664832 -3.196403   | N 1.956127 -0.266831 0.195640   | H 5.709301 -0.050290 -4.227562  |
| C -3.402680 -1.345741 -1.286827 | O -1.046726 2.189768 -0.687085  | C 4.926679 -0.704709 -3.403902  | B 0.718046 -1.070487 2.246595   | H 4.986676 -1.182869 -2.147163  |
| C -3.372691 -0.042130 -1.819162 | O 0.192966 0.076576 -2.454230   | C 4.096754 -1.430781 -2.543724  | C -1.683545 -2.644347 -0.041899 | H 5.106564 -1.214281 0.431821   |
| C -4.112321 0.272122 -2.963851  | C 0.712130 0.098142 4.976758    | C 2.960598 -2.870564 -0.022135  | C -2.473530 -2.656598 -1.285986 | O -1.842894 1.674346 -0.810358  |
| C -4.899980 -0.700955 -3.590689 | H -0.113439 -0.570068 5.245047  | C 1.970225 -3.188352 0.901434   | C -2.940383 -1.471852 -1.886860 | O 0.101615 0.156161 -2.436719   |
| C -4.942151 -1.998527 -3.064967 | H 1.624348 -0.507998 4.945200   | H 0.072989 1.097184 -2.503404   | C -3.710915 -1.522929 -3.052517 | C 0.232333 0.500275 4.998861    |
| C -4.200107 -2.317706 -1.924937 | H 0.824205 0.835624 5.775649    | H -0.265742 -2.801334 2.601921  | C -4.036818 -2.753933 -3.634760 | H -0.264568 -0.448678 5.229163  |
| C -3.051624 -2.654066 0.908906  | C 2.405506 -3.687230 2.540226   | H -2.457630 1.356529 -1.194292  | C -3.581961 -3.938924 -3.042697 | H 1.311418 0.331560 5.084675    |
| C -2.054702 -2.645748 1.877526  | H 2.481451 -3.180494 3.508897   | H -3.416730 2.687624 -3.041722  | C -2.807346 -3.890508 -1.880814 | H -0.057678 1.227192 5.761906   |
| C 0.106525 2.260376 2.020520    | H 1.508098 -4.316015 2.572011   | H -4.793049 1.587293 -4.802673  | C -1.678596 -3.640173 0.962712  | C 3.644080 -2.180699 2.852690   |
| C -0.109646 3.442020 1.219000   | H 3.271357 -4.346546 2.435710   | H -5.193399 -0.870039 -4.693352 | C -0.810824 -3.189303 1.949831  | H 3.457100 -1.612756 3.770909   |
| C -0.573479 3.312288 -0.192634  | C -1.978842 -3.445253 3.142316  | H -4.216707 -2.206863 -2.857468 | C -0.926551 2.183795 1.900992   | H 3.092933 -3.124475 2.936372   |
| C -0.850658 4.590238 -0.898440  | H -2.868783 -4.074020 3.230705  | H -4.190106 -3.024505 -0.563680 | C -1.575589 3.174759 1.039196   | H 4.710437 -2.418582 2.814144   |
| C -0.625655 5.832437 -0.307065  | H -1.100753 -4.100539 3.163667  | H 1.167971 3.617362 0.287716    | C -2.041286 2.801220 -0.304260  | C -0.450478 -3.848695 3.245912  |
| C -0.174651 5.890557 1.015380   | H -1.927967 -2.805382 4.030385  | H 0.030062 4.725665 -1.078896   | C -2.809908 3.823311 -1.124389  | H -0.992457 -4.793691 3.337906  |
| C 0.091817 4.722361 1.745423    | <sup>3</sup> TS <sub>34</sub>   | H 0.139491 6.677233 0.511940    | C -2.986539 5.179776 -0.523545  | H 0.621148 -4.068032 3.312740   |

|                                 |                                    |                                |                                    |                                |
|---------------------------------|------------------------------------|--------------------------------|------------------------------------|--------------------------------|
| H -0.708795 -3.226070 4.109844  | H -0.867427 4.681379 -0.589475     | C 5.413542 5.517244 1.398545   | H -2.239249 -0.323738 0.016562     | H 1.757596 5.541040 -5.317361  |
| <b><sup>34</sup></b>            | H -0.008870 6.672185 0.802159      | C 6.131167 6.012684 2.551433   | H -0.960334 -1.466938 0.452151     | H -0.037100 3.832106 -5.587649 |
| Fe 0.006461 0.324681 -0.274653  | H -0.020694 6.123435 3.211506      | C 6.044467 5.366961 3.760734   | H -1.403113 -0.175876 1.570157     | H -0.467254 2.189944 -3.791230 |
| N -1.285412 -2.121977 0.819433  | H -0.023640 3.782203 3.983705      | C 5.183573 4.241871 3.895618   | O 6.854846 4.029128 -0.287093      | H -1.438110 1.573776 -1.665056 |
| N -1.535688 -1.110544 -0.063031 | H -0.046060 1.627974 4.747321      | C 2.925718 2.048007 4.198971   | H 7.172133 4.600781 -1.006088      | H 6.266540 4.666518 0.569333   |
| N -0.023063 -0.681162 2.438473  | H 3.018036 1.243344 -0.561817      | C 2.192645 0.941953 3.768401   | H 6.117860 3.298586 -0.739439      | H 5.173288 6.061904 0.519244   |
| N -0.014832 0.447299 1.677516   | H 4.202031 2.678519 -2.194931      | C 4.827398 -1.220358 -0.371467 | <b><sup>3</sup>TS<sub>45</sub></b> | H 6.761927 6.804112 2.315713   |
| N 1.250783 -2.136714 0.838715   | H 5.238096 1.673805 -4.224321      | C 6.137119 -0.940006 -0.990448 | Fe 3.829578 1.872408 0.157895      | H 6.560927 5.735289 4.551351   |
| N 1.539238 -1.118969 -0.026038  | H 5.073181 -0.781979 -4.605430     | C 7.049304 -0.041905 -0.399754 | N 0.996089 0.633085 0.293091       | H 5.079605 3.784253 4.860608   |
| B -0.023488 -2.052314 1.722004  | H 3.862328 -2.212653 -2.985102     | C 8.309093 0.172794 -0.971369  | N 1.656081 1.514720 -0.516995      | H 2.846307 2.488926 5.182357   |
| C -2.663945 -1.430370 -0.738097 | H 3.972623 -3.267573 -0.564852     | C 8.682250 -0.512496 -2.134475 | N 2.349325 0.776533 2.440773       | H 6.837834 0.489717 0.647509   |
| C -3.301636 -0.551442 -1.731425 | O -0.007670 2.226299 -0.303841     | C 7.787906 -1.415924 -2.722973 | N 3.209066 1.723471 2.010176       | H 9.102223 0.872862 -0.284005  |
| C -3.283066 0.849568 -1.592543  | O 0.032953 0.268972 -2.078281      | C 6.527374 -1.628700 -2.156365 | N 2.962588 -0.894819 0.658935      | H 9.763693 -0.184679 -2.440003 |
| C -3.919783 1.665580 -2.531908  | C -0.051880 -1.351067 4.869046     | C 4.265012 -2.497322 -0.149149 | N 4.002611 -0.183650 0.120062      | H 8.137075 -1.624896 -3.657899 |
| C -4.592921 1.097052 -3.620872  | H -0.937804 -1.994203 4.820968     | C 3.074056 -2.274982 0.533936  | B 1.774467 -0.181047 1.355838      | H 5.869170 -2.001356 -2.725185 |
| C -4.625553 -0.295814 -3.763050 | H 0.827144 -2.004328 4.835821      | H 5.759243 1.650873 -1.545065  | C 0.749408 1.984416 -1.402447      | H 4.820413 -3.317462 -0.497240 |
| C -3.987035 -1.113216 -2.826108 | H -0.057193 -0.839293 5.834532     | H 1.036259 -0.901184 1.889847  | C 1.057515 2.958470 -2.465382      | O 3.886415 3.821882 0.481740   |
| C -3.129207 -2.683582 -0.281429 | C 2.153902 -4.394242 1.528837      | H 2.321989 4.241728 -1.263913  | C 2.068568 3.928970 -2.322781      | O 5.119443 2.254274 -1.231144  |
| C -2.235573 -3.095309 0.704438  | H 2.174478 -4.190069 2.604994      | H 2.776145 5.891484 -3.044130  | C 2.317190 4.848708 -3.347169      | C 1.164604 0.089249 4.559165   |
| C -0.022486 1.521826 2.507873   | H 1.259293 -4.994862 1.328082      | H 1.757359 5.621840 -5.300681  | C 1.562127 4.823920 -4.526191      | H 0.138430 0.141221 4.177662   |
| C -0.016362 2.891780 2.015543   | H 3.027460 -5.003391 1.282996      | H 0.278797 3.669358 -5.758961  | C 0.552142 3.865264 -4.676319      | H 1.469740 -0.962699 4.531391  |
| C -0.009300 3.146601 0.621716   | C -2.257305 -4.343663 1.531274     | H -0.152729 1.995647 -3.985512 | C 0.304148 2.941529 -3.657548      | H 1.151915 0.410511 5.603706   |
| C -0.003474 4.567256 0.089610   | H -3.135895 -4.940211 1.272911     | H -1.391236 1.473916 -1.795004 | C -0.510349 1.387665 -1.148262     | C 2.192521 -3.289983 0.933467  |
| C -0.009961 5.640117 1.139031   | H -1.369212 -4.963067 1.361595     | H 6.229663 4.828391 0.633208   | C -0.322099 0.538168 -0.065786     | H 2.057191 -3.267628 2.020518  |
| C -0.016675 5.331162 2.468915   | H -2.300444 -4.122907 2.603539     | H 5.135846 6.250139 0.636369   | C 3.519397 2.533747 3.044251       | H 1.201336 -3.177064 0.479926  |
| C -0.019263 3.979605 2.917953   | <b><sup>5</sup>TS<sub>45</sub></b> | H 6.764966 6.887154 2.435463   | C 4.424751 3.666081 2.835711       | H 2.576483 -4.276591 0.660985  |
| C -0.036713 1.045117 3.841481   | Fe 3.708023 2.025549 -0.054333     | H 6.614466 5.704509 4.618835   | C 4.514439 4.266733 1.515886       | C -1.322985 -0.334198 0.628548 |
| C -0.037108 -0.344116 3.762080  | N 1.013975 0.652894 0.257795       | H 5.140438 3.737875 4.857413   | C 5.460690 5.363177 1.310346       | H -2.304680 -0.206984 0.164382 |
| C 2.666372 -1.460557 -0.691768  | N 1.653285 1.566232 -0.537432      | H 2.992072 2.416038 5.210305   | C 6.139250 5.925726 2.457208       | H -1.057086 -1.395849 0.567672 |
| C 3.342944 -0.585699 -1.664154  | N 2.360335 0.845821 2.412659       | H 6.771802 0.474293 0.512880   | C 6.021901 5.344154 3.696125       | H -1.418775 -0.084568 1.691473 |
| C 3.450656 0.802173 -1.453314   | N 3.165348 1.841177 1.977791       | H 8.998589 0.867365 -0.502413  | C 5.161353 4.224257 3.870507       | O 6.836705 3.804454 -0.374248  |
| C 4.125969 1.610336 -2.372741   | N 2.945728 -0.921973 0.690466      | H 9.660255 -0.347428 -2.574862 | C 2.834118 2.067455 4.190102       | H 7.158460 4.347737 -1.112778  |
| C 4.712840 1.045326 -3.512227   | N 4.008606 -0.268065 0.130281      | H 8.069653 -1.950770 -3.624454 | C 2.094853 0.957651 3.771221       | H 6.059555 3.096414 -0.792846  |
| C 4.622218 -0.335978 -3.724614  | B 1.784098 -0.136903 1.357745      | H 5.833352 -2.322310 -2.620382 | C 4.868799 -1.089624 -0.394835     | <b><sup>5</sup>S</b>           |
| C 3.945091 -1.145147 -2.807677  | C 0.755683 1.992687 -1.456492      | H 4.693148 -3.451497 -0.411830 | C 6.190270 -0.776881 -0.976900     | Fe 3.823489 1.850022 -0.000682 |
| C 3.091342 -2.732616 -0.249632  | C 1.058148 2.990731 -2.498619      | O 3.750497 4.060631 0.556201   | C 7.120803 0.032382 -0.294319      | N 1.107240 0.580667 0.207820   |
| C 2.175389 -3.133754 0.720409   | C 1.886134 4.102078 -2.246651      | O 5.253565 2.417783 -1.235327  | C 8.398741 0.245609 -0.821623      | N 1.747900 1.557319 -0.502203  |
| H 0.026088 1.188494 -2.396617   | C 2.137121 5.039525 -3.254603      | C 1.348593 -0.000666 4.568774  | C 8.771042 -0.350105 -2.033732     | N 2.320906 0.888616 2.418990   |
| H -0.035714 -2.942882 2.517765  | C 1.561367 4.891156 -4.522330      | H 0.305855 -0.000571 4.231865  | C 7.856841 -1.161265 -2.717431     | N 3.208843 1.834311 2.009584   |
| H -2.777038 1.297038 -0.743942  | C 0.728435 3.794582 -4.778874      | H 1.712583 -1.032221 4.500165  | C 6.578062 -1.375408 -2.192529     | N 3.038677 -0.951302 0.823703  |
| H -3.896842 2.743999 -2.409893  | C 0.479278 2.853039 -3.776618      | H 1.362890 0.292091 5.621773   | C 4.350421 -2.390177 -0.211719     | N 4.076317 -0.306637 0.209786  |
| H -5.087835 1.731959 -4.348797  | C -0.474545 1.333060 -1.245409     | C 2.086770 -3.280599 1.042443  | C 3.146360 -2.234661 0.464754      | B 1.824287 -0.149870 1.387217  |
| H -5.142167 -0.745081 -4.605317 | C -0.280869 0.496122 -0.150088     | H 1.945649 -3.205742 2.126350  | H 5.529024 1.486908 -1.656294      | C 0.885446 2.007347 -1.441076  |
| H -3.999422 -2.191154 -2.951646 | C 3.523840 2.593929 3.036876       | H 1.101447 -3.160832 0.577531  | H 1.055176 -0.985945 1.868091      | C 1.206311 3.115403 -2.358400  |
| H -4.021206 -3.199659 -0.597810 | C 4.405064 3.751617 2.857209       | H 2.442639 -4.289442 0.817056  | H 2.652100 3.970215 -1.411709      | C 1.873906 4.269581 -1.902181  |
| H 0.871881 4.679579 -0.575370   | C 4.445710 4.434653 1.570839       | C -1.268256 -0.416829 0.510017 | H 3.099592 5.590634 -3.219048      | C 2.151715 5.323401 -2.779569  |

|                                |                                 |                                 |                                 |                                 |
|--------------------------------|---------------------------------|---------------------------------|---------------------------------|---------------------------------|
| C 1.760197 5.246060 -4.122344  | H 0.080706 0.229420 4.106985    | C 7.878594 -1.362377 -2.580159  | N 1.159866 1.068315 -0.345544   | H 1.812871 1.976680 5.400992    |
| C 1.083648 4.108868 -4.581682  | H 1.409118 -0.860342 4.511163   | C 6.653861 -1.659517 -1.974435  | N 1.989381 0.439697 2.525640    | H 6.164587 1.672522 0.375706    |
| C 0.807120 3.053386 -3.707506  | H 1.051719 0.521906 5.557977    | C 4.394983 -2.543941 0.022310   | N 2.590540 1.630014 2.221180    | H 8.055090 2.772336 -0.772070   |
| C -0.323641 1.286943 -1.341708 | C 2.285791 -3.304683 1.374529   | C 3.184899 -2.345772 0.684908   | N 3.145317 -1.051738 0.820708   | H 9.197985 1.638446 -2.672037   |
| C -0.154241 0.395629 -0.283564 | H 2.144001 -3.145909 2.449177   | H 4.893777 0.936344 -2.046197   | N 3.959310 -0.113794 0.247134   | H 8.407646 -0.599601 -3.429420  |
| C 3.516187 2.615917 3.064028   | H 1.295843 -3.263165 0.906517   | H 1.050003 -0.943791 1.943199   | B 1.776160 -0.644017 1.433177   | H 6.480627 -1.680678 -2.310021  |
| C 4.467593 3.725978 2.963857   | H 2.683307 -4.312791 1.231297   | H 2.438506 4.200111 -0.810034   | C 0.193336 1.274767 -1.267469   | H 5.632020 -2.914397 -0.187220  |
| C 5.175032 4.030282 1.757405   | C -1.134084 -0.593216 0.269015  | H 2.967311 6.086862 -2.323330   | C 0.163578 2.439712 -2.168385   | O 3.728168 3.421216 -0.690242   |
| C 6.096272 5.104814 1.773818   | H -2.073950 -0.526864 -0.285028 | H 2.076031 6.115275 -4.649871   | C 0.589308 3.714435 -1.741879   | O 3.723978 2.901780 -2.080066   |
| C 6.316308 5.867993 2.916669   | H -0.767080 -1.622536 0.187491  | H 0.645557 4.236864 -5.443938   | C 0.544497 4.808762 -2.614352   | C 0.914263 -0.721077 4.500064   |
| C 5.615263 5.579325 4.097242   | H -1.350214 -0.407666 1.326795  | H 0.132411 2.340921 -3.935455   | C 0.060514 4.652575 -3.919925   | H -0.052595 -0.947921 4.036875  |
| C 4.710687 4.520609 4.105207   | O 5.921296 4.167455 -1.769302   | H -1.195133 1.471595 -1.893742  | C -0.379295 3.393481 -4.347576  | H 1.519010 -1.633378 4.455673   |
| C 2.787269 2.147985 4.190781   | H 5.428976 4.945310 -2.073832   | H 5.744684 3.822942 -0.860373   | C -0.326712 2.297111 -3.481676  | H 0.736111 -0.484499 5.552116   |
| C 2.042323 1.059303 3.748068   | H 5.131121 2.696974 -2.164546   | H 6.216857 5.581074 0.567691    | C -0.749883 0.224698 -1.195588  | C 3.085176 -3.546805 1.239231   |
| C 4.937117 -1.258629 -0.220089 | <b><sup>3</sup>5</b>            | H 6.692894 6.931010 2.583460    | C -0.313092 -0.617068 -0.178491 | H 2.909966 -3.490814 2.319168   |
| C 6.199731 -0.947671 -0.915528 | Fe 3.814678 1.778128 0.115178   | H 5.736944 6.259800 4.793919    | C 2.579731 2.389573 3.342208    | H 2.121464 -3.760509 0.763292   |
| C 7.017882 0.129775 -0.514974  | N 1.088501 0.563267 0.256836    | H 4.298305 4.260059 4.935897    | C 3.134535 3.752316 3.407826    | H 3.748937 -4.393811 1.048062   |
| C 8.217289 0.399407 -1.184493  | N 1.754484 1.537404 -0.427844   | H 2.904973 2.535149 5.140425    | C 4.198375 4.164782 2.581950    | C -0.949224 -1.872793 0.333294  |
| C 8.626989 -0.408125 -2.252865 | N 2.367588 0.833739 2.408790    | H 6.699787 0.684272 0.504002    | C 4.704372 5.465978 2.663885    | H -1.872596 -2.066135 -0.218768 |
| C 7.829639 -1.489634 -2.649476 | N 3.227480 1.786362 1.957770    | H 8.850264 1.229966 -0.593795   | C 4.164892 6.374865 3.582758    | H -0.295922 -2.744059 0.211056  |
| C 6.626692 -1.756577 -1.989214 | N 3.007575 -0.998249 0.809013   | H 9.620362 -0.084430 -2.562330  | C 3.113547 5.973815 4.416800    | H -1.200352 -1.801116 1.397366  |
| C 4.432275 -2.532092 0.116926  | N 4.058003 -0.326538 0.253923   | H 8.209233 -1.941341 -3.436483  | C 2.601123 4.676654 4.328881    | S 7.187452 5.950919 -0.597967   |
| C 3.229161 -2.303330 0.781945  | B 1.811410 -0.199142 1.402197   | H 6.035297 -2.460696 -2.366217  | C 1.955491 1.663265 4.379712    | C 5.822463 5.837906 -1.805314   |
| H 5.230813 1.122763 -2.166660  | C 0.912081 2.013184 -1.371043   | H 4.856438 -3.490031 -0.210618  | C 1.595825 0.433818 3.833793    | H 5.144342 5.055395 -1.444260   |
| H 1.057669 -0.906698 1.903156  | C 1.254956 3.129730 -2.267120   | O 4.830629 3.400475 0.455338    | C 5.050970 -0.758494 -0.225934  | H 5.276563 6.783010 -1.871666   |
| H 2.151062 4.350624 -0.855729  | C 2.057673 4.199945 -1.825896   | O 4.437812 1.769409 -1.840144   | C 6.175348 -0.079186 -0.892984  | H 6.194935 5.548483 -2.791165   |
| H 2.654836 6.212008 -2.410214  | C 2.354396 5.265345 -2.681929   | C 1.222272 0.148149 4.552656    | C 6.638460 1.180154 -0.466426   | C 8.217282 7.269648 -1.232134   |
| H 1.973136 6.065615 -4.801081  | C 1.848392 5.285455 -3.988372   | H 0.184502 0.210343 4.204135    | C 7.717620 1.796847 -1.107645   | C 9.339319 7.631030 -0.457108   |
| H 0.775211 4.042117 -5.620141  | C 1.041434 4.230582 -4.433199   | H 1.517342 -0.906154 4.509894   | C 8.359758 1.159355 -2.176485   | C 7.974588 7.947828 -2.439250   |
| H 0.294595 2.168178 -4.070495  | C 0.746343 3.162692 -3.580325   | H 1.244121 0.462841 5.599301    | C 7.916098 -0.099682 -2.600816  | C 10.195386 8.648240 -0.883899  |
| H -1.214496 1.425117 -1.932995 | C -0.312672 1.310092 -1.295491  | C 2.217831 -3.368436 1.196789   | C 6.833173 -0.713640 -1.965699  | H 9.536841 7.115333 0.478287    |
| H 5.661896 4.024768 -0.810268  | C -0.169902 0.398867 -0.252568  | H 2.034147 -3.256756 2.270805   | C 4.920029 -2.138179 0.041757   | C 8.839083 8.968431 -2.858233   |
| H 6.641288 5.318281 0.859696   | C 3.554797 2.591676 2.989542    | H 1.247157 -3.301261 0.692032   | C 3.706684 -2.292214 0.707790   | H 7.122932 7.689543 -3.056585   |
| H 7.031341 6.684881 2.889326   | C 4.437187 3.750878 2.845344    | H 2.616974 -4.371088 1.023613   | H 2.913653 3.318623 -2.433054   | C 9.950255 9.324211 -2.087648   |
| H 5.774789 6.168217 4.994214   | C 5.004037 4.121317 1.589323    | C -1.164441 -0.588075 0.276585  | H 1.265659 -1.603562 1.924216   | H 11.054154 8.913628 -0.274956  |
| H 4.171361 4.296215 5.019727   | C 5.796282 5.293095 1.524883    | H -2.094488 -0.514434 -0.293040 | H 0.942769 3.851374 -0.726035   | H 8.637384 9.482844 -3.792998   |
| H 2.798299 2.537240 5.195596   | C 6.068936 6.045500 2.664930    | H -0.802150 -1.619333 0.196799  | H 0.875282 5.782739 -2.268269   | H 10.616011 10.115097 -2.417161 |
| H 6.726324 0.739933 0.333086   | C 5.531582 5.674211 3.904084    | H -1.398632 -0.406751 1.331654  | H 0.022998 5.502413 -4.593444   | <b><sup>3</sup>RC</b>           |
| H 8.834156 1.232180 -0.862943  | C 4.721936 4.543282 3.978238    | O 6.158086 3.790337 -1.777882   | H -0.754973 3.262900 -5.357356  | Fe 3.124067 1.884435 0.323094   |
| H 9.558760 -0.199246 -2.768107 | C 2.872689 2.124678 4.144879    | H 5.923565 4.620911 -2.218900   | H -0.649521 1.320144 -3.826495  | N 0.849463 -0.155349 0.295287   |
| H 8.140527 -2.120234 -3.476213 | C 2.134486 1.017685 3.744546    | H 5.098142 2.497476 -2.017066   | H -1.649306 0.116784 -1.779993  | N 1.155759 0.998933 -0.365598   |
| H 6.003916 -2.585215 -2.310761 | C 4.918151 -1.256981 -0.225024  | <b>2. Substrate oxidation</b>   | H 4.639547 3.466895 1.878941    | N 1.914713 0.460339 2.514240    |
| H 4.897470 -3.487554 -0.064985 | C 6.201957 -0.915542 -0.864887  | <b>2.1 Sulfide oxidation</b>    | H 5.518945 5.765641 2.011861    | N 2.612065 1.599899 2.225363    |
| O 5.018092 3.350834 0.599437   | C 7.015616 0.126017 -0.370922   | <b><sup>5</sup>RC</b>           | H 4.559726 7.383582 3.647732    | N 3.164407 -0.987158 0.872634   |
| O 4.604729 1.857071 -2.047243  | C 8.236400 0.425072 -0.984446   | Fe 3.129464 1.846532 0.171894   | H 2.687390 6.672292 5.130006    | N 3.898576 0.002043 0.287986    |
| C 1.096333 0.190057 4.517459   | C 8.671552 -0.317079 -2.090180  | N 0.845213 -0.083898 0.319051   | H 1.771511 4.381983 4.963199    | B 1.762642 -0.651404 1.449082   |

|                                 |                                 |                                 |                                 |                                 |
|---------------------------------|---------------------------------|---------------------------------|---------------------------------|---------------------------------|
| C 0.264653 1.117630 -1.376535   | H 5.728145 -2.684363 -0.226958  | C -0.439008 2.335097 -3.418511  | H 0.696223 -0.355298 5.520062   | C 5.433962 5.235535 2.512175    |
| C 0.248071 2.250655 -2.318128   | O 3.076767 3.725552 0.044316    | C -0.754746 0.194543 -1.183750  | C 3.169231 -3.514304 1.276581   | C 4.833292 6.375549 3.061621    |
| C 0.531828 3.566686 -1.896171   | O 3.558667 3.172342 -1.236413   | C -0.284846 -0.657545 -0.185898 | H 2.994757 -3.435285 2.355000   | C 3.539252 6.290677 3.591394    |
| C 0.497749 4.629381 -2.809093   | C 0.591957 -0.560608 4.411025   | C 2.563758 2.454066 3.244600    | H 2.209578 -3.759386 0.807739   | C 2.849632 5.074956 3.569987    |
| C 0.168389 4.399650 -4.150672   | H -0.340298 -0.744655 3.864828  | C 3.115367 3.818933 3.292255    | H 3.850265 -4.351345 1.103878   | C 1.965849 2.123360 4.127724    |
| C -0.128822 3.098088 -4.575151  | H 1.138920 -1.509050 4.450775   | C 4.295976 4.171909 2.610713    | C -0.879368 -1.942558 0.300954  | C 1.513295 0.870799 3.724172    |
| C -0.087746 2.033834 -3.669692  | H 0.331346 -0.276976 5.433949   | C 4.803295 5.472935 2.694286    | H -1.802836 -2.149906 -0.245443 | C 4.967081 -0.803026 -0.194236  |
| C -0.618951 0.014798 -1.359626  | C 3.255175 -3.484106 1.254422   | C 4.146858 6.438018 3.468066    | H -0.201266 -2.789777 0.149167  | C 6.093943 -0.168240 -0.899746  |
| C -0.222252 -0.775514 -0.285191 | H 3.079960 -3.442298 2.334928   | C 2.977296 6.095338 4.158582    | H -1.119003 -1.903342 1.369056  | C 6.664994 1.033251 -0.438503   |
| C 2.562406 2.393325 3.321255    | H 2.305107 -3.756277 0.780604   | C 2.465423 4.797976 4.071103    | S 7.312285 5.834377 -0.519376   | C 7.749775 1.608604 -1.107599   |
| C 3.261476 3.684859 3.438803    | H 3.969734 -4.287506 1.057975   | C 1.918832 1.763560 4.292835    | C 5.872476 5.768509 -1.643475   | C 8.287051 0.986984 -2.241710   |
| C 4.584827 3.843686 2.985878    | C -0.818114 -2.059907 0.203789  | C 1.581436 0.510462 3.787064    | H 5.237865 4.953771 -1.279506   | C 7.735278 -0.215843 -2.701062  |
| C 5.253427 5.059673 3.156398    | H -1.693157 -2.312375 -0.400877 | C 5.074177 -0.727985 -0.271651  | H 5.306086 6.703188 -1.613621   | C 6.648817 -0.790492 -2.035284  |
| C 4.611335 6.135361 3.783849    | H -0.110596 -2.894117 0.134580  | C 6.187841 -0.056383 -0.962625  | H 6.179860 5.548187 -2.669048   | C 4.810983 -2.166945 0.125779   |
| C 3.296860 5.986128 4.243554    | H -1.138028 -1.991267 1.249338  | C 6.620000 1.233688 -0.601773   | C 8.291582 7.195815 -1.141422   | C 3.616798 -2.266356 0.839193   |
| C 2.627830 4.770002 4.075287    | S 7.123297 6.231131 -0.167990   | C 7.696842 1.833136 -1.262623   | C 9.478218 7.497672 -0.440996   | H 3.031959 2.746639 -2.238785   |
| C 1.797989 1.748455 4.318495    | C 5.538730 6.210291 -1.077883   | C 8.365105 1.149934 -2.285940   | C 7.949563 7.963409 -2.268087   | H 1.214145 -1.429718 2.109275   |
| C 1.404811 0.526917 3.779918    | H 4.881523 5.526967 -0.533508   | C 7.949329 -0.137971 -2.647136  | C 10.300435 8.544749 -0.861957  | H 1.028817 3.654263 -1.286623   |
| C 5.013025 -0.567237 -0.228670  | H 5.081094 7.202453 -1.104584   | C 6.870412 -0.736237 -1.991706  | H 9.753280 6.911516 0.431163    | H 1.072746 5.318957 -3.118129   |
| C 6.066755 0.193608 -0.919112   | H 5.671463 5.829470 -2.093663   | C 4.965878 -2.101802 0.029727   | C 8.781260 9.012576 -2.682246   | H 0.375140 4.670081 -5.420592   |
| C 6.392709 1.512323 -0.547713   | C 8.176145 7.286838 -1.157332   | C 3.763308 -2.260276 0.713755   | H 7.045034 7.752978 -2.825481   | H -0.360403 2.333310 -5.870571  |
| C 7.400063 2.215972 -1.215993   | C 9.510273 7.436408 -0.724856   | H 2.916854 2.935954 -2.424467   | C 9.956830 9.309502 -1.985695   | H -0.371555 0.659020 -4.046609  |
| C 8.108924 1.606916 -2.258770   | C 7.752556 7.963850 -2.313936   | H 1.321654 -1.601439 1.934262   | H 11.210191 8.763302 -0.311289  | H -1.556862 -0.160348 -1.907329 |
| C 7.803006 0.290864 -2.629333   | C 10.396993 8.246946 -1.436575  | H 0.905456 3.841094 -0.669173   | H 8.503172 9.596223 -3.554615   | H 5.221474 3.135922 2.079759    |
| C 6.790807 -0.409138 -1.967662  | H 9.849776 6.916356 0.166334    | H 0.779363 5.801209 -2.165342   | H 10.596883 10.122858 -2.311278 | H 6.438718 5.290978 2.105407    |
| C 4.976172 -1.955859 0.029359   | C 8.650861 8.773665 -3.022055   | H -0.145646 5.566415 -4.466708  | <sup>3</sup> TS <sub>OO</sub>   | H 5.370204 7.318533 3.080361    |
| C 3.794243 -2.190731 0.726533   | H 6.733546 7.868865 -2.668732   | H -0.930148 3.339035 -5.257903  | Fe 3.242761 1.796398 0.122821   | H 3.066936 7.169816 4.018137    |
| H 2.769987 3.265440 -1.814830   | C 9.972753 8.920636 -2.590523   | H -0.763909 1.363431 -3.775929  | N 0.816035 -0.098420 0.332870   | H 1.843258 5.014636 3.972146    |
| H 1.287153 -1.627930 1.946250   | H 11.420559 8.350679 -1.090015  | H -1.656439 0.071768 -1.761351  | N 1.198494 0.940615 -0.465259   | H 1.812791 2.586608 5.088884    |
| H 0.759371 3.757894 -0.852314   | H 8.308873 9.289791 -3.914010   | H 4.820043 3.428884 2.021479    | N 1.974481 0.662688 2.455256    | H 6.275335 1.504775 0.457795    |
| H 0.716253 5.635547 -2.465571   | H 10.663380 9.549273 -3.142793  | H 5.709414 5.729661 2.154707    | N 2.698714 1.743685 2.036266    | H 8.177334 2.535736 -0.740049   |
| H 0.138762 5.224312 -4.855230   | <sup>5</sup> TS <sub>OO</sub>   | H 4.543822 7.445992 3.533226    | N 3.093514 -1.010706 0.932833   | H 9.129276 1.433910 -2.759803   |
| H -0.384900 2.910372 -5.613069  | Fe 3.083785 1.822104 0.067409   | H 2.461443 6.837807 4.759231    | N 3.906243 -0.115975 0.295644   | H 8.146975 -0.703094 -3.579134  |
| H -0.301199 1.025694 -4.009885  | N 0.857452 -0.105096 0.316878   | H 1.549109 4.542236 4.593537    | B 1.727843 -0.536422 1.506485   | H 6.214133 -1.715159 -2.401579  |
| H -1.455237 -0.161715 -2.017031 | N 1.134308 1.068322 -0.330308   | H 1.753047 2.117452 5.297315    | C 0.289286 1.022413 -1.462192   | H 5.498017 -2.966903 -0.097541  |
| H 5.090857 3.007062 2.516203    | N 2.011265 0.468157 2.492598    | H 6.120745 1.770334 0.196940    | C 0.335919 2.031285 -2.535957   | O 3.278543 3.455852 -0.308612   |
| H 6.275157 5.166516 2.806888    | N 2.609719 1.652216 2.152473    | H 8.009905 2.832804 -0.978191   | C 0.740667 3.359485 -2.289455   | O 3.840491 2.637721 -1.698302   |
| H 5.132754 7.077909 3.916160    | N 3.183500 -1.028098 0.809641   | H 9.201418 1.616592 -2.796533   | C 0.759184 4.300957 -3.326523   | C 0.687439 -0.119264 4.485530   |
| H 2.792742 6.815068 4.730208    | N 3.977632 -0.088702 0.203395   | H 8.459470 -0.672600 -3.442156  | C 0.363191 3.938089 -4.619615   | H -0.269352 -0.320436 3.990276  |
| H 1.606117 4.659198 4.424692    | B 1.812158 -0.638980 1.428857   | H 6.539345 -1.726367 -2.288200  | C -0.052831 2.624200 -4.871100  | H 1.202738 -1.079126 4.600965   |
| H 1.598142 2.110519 5.314006    | C 0.155731 1.269543 -1.245556   | H 5.687100 -2.872185 -0.188949  | C -0.065176 1.679631 -3.840887  | H 0.473552 0.272344 5.483272    |
| H 5.873282 1.985392 0.280068    | C 0.090952 2.453738 -2.118043   | O 3.792826 3.313714 -0.523168   | C -0.687173 0.012750 -1.293919  | C 2.977011 -3.484084 1.430292   |
| H 7.630545 3.234249 -0.917477   | C 0.522370 3.721004 -1.676286   | O 3.622139 2.352754 -2.088307   | C -0.326176 -0.681730 -0.144843 | H 2.802116 -3.370971 2.505496   |
| H 8.893023 2.151233 -2.775150   | C 0.442267 4.833284 -2.521597   | C 0.890322 -0.623587 4.478586   | C 2.715099 2.642230 3.049066    | H 2.010180 -3.705167 0.963783   |
| H 8.347380 -0.187429 -3.437469  | C -0.081398 4.702157 -3.813824  | H -0.069690 -0.864554 4.008154  | C 3.441537 3.923520 3.013614    | H 3.626848 -4.349949 1.280857   |
| H 6.544541 -1.421054 -2.272941  | C -0.525232 3.449603 -4.257147  | H 1.496137 -1.536134 4.470582   | C 4.744903 4.019026 2.490388    | C -1.014856 -1.841012 0.507425  |

|                                  |                                 |                                 |                                 |                                 |
|----------------------------------|---------------------------------|---------------------------------|---------------------------------|---------------------------------|
| H -1.933299 -2.075628 -0.037027  | C -0.704486 3.175673 -0.862402  | H 3.754626 -0.638190 -2.365811  | C -0.703666 -3.845153 -2.856667 | H -4.481553 -0.718089 2.115601  |
| H -0.390210 -2.741692 0.513920   | C 0.709743 3.339290 -1.247106   | H 4.287118 -2.334935 -2.143672  | C 2.264397 -3.413749 -2.145877  | C -7.291592 -0.573705 -0.558036 |
| H -1.284471 -1.624916 1.547135   | C 1.398513 2.374426 -2.006053   | C 5.268093 -0.470211 0.206650   | C 3.330860 -2.923675 -1.399103  | H -6.073355 0.881279 -1.567731  |
| S 7.480479 5.645954 -1.278891    | C 2.725335 2.594254 -2.391694   | C 5.524166 0.089048 1.475366    | H -1.588827 -0.392010 0.262528  | C -7.428082 -1.420508 0.546285  |
| C 5.675421 5.866796 -1.460921    | C 3.385485 3.775125 -2.029731   | C 6.250058 -0.378114 -0.794651  | H 4.770317 -1.217372 0.341077   | H -6.502107 -2.119042 2.370203  |
| H 5.246895 4.862790 -1.511426    | C 2.707651 4.741003 -1.275315   | C 6.741262 0.723840 1.732716    | H 0.129374 1.821053 2.573558    | H -8.072004 -0.531276 -1.311727 |
| H 5.250536 6.377786 -0.593754    | C 1.381903 4.526112 -0.889480   | H 4.767292 0.032974 2.252025    | H -1.947836 2.700744 3.591717   | H -8.311902 -2.040298 0.655562  |
| H 5.431621 6.409166 -2.377999    | C -1.668652 4.207639 -0.797697  | C 7.465507 0.266359 -0.527776   | H -3.213443 1.327802 5.239353   | <sup>5</sup> TS <sub>SO,a</sub> |
| C 8.103581 7.313751 -1.099410    | C -2.859782 3.607484 -0.406271  | H 6.080555 -0.802923 -1.776701  | H -2.384836 -0.941026 5.849677  | Fe 0.185441 0.106738 -0.195733  |
| C 9.489762 7.454326 -0.880066    | H 1.578896 0.062298 0.541059    | C 7.718623 0.817717 0.732188    | H -0.320224 -1.831772 4.808018  | N 2.988483 -0.432542 -1.334065  |
| C 7.302541 8.466641 -1.166354    | H -4.632711 1.606687 0.465098   | H 6.922531 1.151513 2.713805    | H 2.316183 -1.592132 4.756460   | N 1.705776 -0.884584 -1.452009  |
| C 10.056946 8.721655 -0.731942   | H -0.680055 -2.697245 1.588677  | H 8.214127 0.331977 -1.311440   | H 0.866986 2.138108 -2.992653   | N 3.036702 -0.139501 1.175844   |
| H 10.119255 6.570869 -0.824258   | H 1.122004 -4.236162 2.300192   | H 8.661759 1.314956 0.933257    | H -0.779619 3.789887 -3.838796  | N 1.799046 -0.677599 1.379297   |
| C 7.881118 9.734109 -1.015106    | H 2.308637 -3.862114 4.457718   | <sup>3</sup> IM                 | H -1.006451 6.006354 -2.728542  | N 2.637600 1.874928 -0.291302   |
| H 6.235496 8.389345 -1.335307    | H 1.679766 -1.924434 5.891181   | Fe 0.670847 0.111035 0.007152   | H 0.427755 6.561381 -0.770763   | N 1.301471 1.961001 -0.014386   |
| C 9.255699 9.870279 -0.797905    | H -0.102306 -0.364937 5.161631  | N 2.928139 -0.951296 1.615436   | H 2.071498 4.904876 0.075480    | B 3.391019 0.518258 -0.174905   |
| H 11.125673 8.811598 -0.563500   | H -2.711615 -0.116788 4.816018  | N 1.686663 -0.402509 1.755678   | H 4.489686 3.598069 -1.124305   | C 1.657630 -1.679049 -2.543456  |
| H 7.248570 10.614988 -1.069223   | H -0.713241 -1.284013 -3.552786 | N 3.558076 0.593730 -0.248916   | H -0.457432 -0.450598 -2.667095 | C 0.452400 -2.414271 -2.962907  |
| H 9.698137 10.854135 -0.681794   | H 0.710668 -2.993017 -4.648433  | N 2.349742 1.172311 -0.527465   | H -2.660721 -0.625251 -3.774407 | C -0.397247 -3.027502 -2.022622 |
| <sup>5</sup> IM                  | H 0.381626 -5.407629 -4.139661  | N 2.898987 -1.783834 -0.781307  | H -3.635478 -2.857930 -4.289102 | C -1.518650 -3.752088 -2.439778 |
| Fe -0.650822 -0.068331 -0.105935 | H -1.401279 -6.101263 -2.544242 | N 1.595448 -1.532664 -1.104539  | H -2.370583 -4.920335 -3.693171 | C -1.806577 -3.882201 -3.804823 |
| N -2.977791 0.634423 1.651121    | H -2.834616 -4.387806 -1.464195 | B 3.631240 -0.876902 0.235838   | H -0.163563 -4.747374 -2.588341 | C -0.962310 -3.284234 -4.748956 |
| N -1.837024 -0.113249 1.646523   | H -4.775919 -2.447903 -2.511975 | C 1.295684 -0.600561 3.038292   | H 2.271787 -4.282910 -2.783405  | C 0.158099 -2.559241 -4.332324  |
| N -3.579939 -0.026601 -0.678900  | H 0.898544 1.454023 -2.282090   | C 0.045573 -0.073808 3.609002   | O -0.367109 1.272748 -0.815046  | C 2.936076 -1.721737 -3.142341  |
| N -2.430925 -0.677312 -1.036600  | H 3.241378 1.844629 -2.983802   | C -0.427106 1.209843 3.276410   | O -0.766366 -0.825775 0.562383  | C 3.758770 -0.924875 -2.351110  |
| N -2.604340 2.274504 -0.245818   | H 4.414794 3.940704 -2.331425   | C -1.596581 1.709004 3.857653   | C 6.014227 1.179565 -0.231441   | C 1.794517 -1.173800 2.636463   |
| N -1.292592 2.004634 -0.522930   | H 3.211142 5.657536 -0.984449   | C -2.307702 0.937590 4.786341   | H 6.225824 0.892624 0.804567    | C 0.691130 -1.963862 3.209556   |
| B -3.534321 1.169700 0.304880    | H 0.866012 5.272128 -0.293671   | C -1.839372 -0.336813 5.131698  | H 6.350288 0.357720 -0.873014   | C 0.370374 -1.845205 4.575815   |
| C -1.597354 -0.502593 2.922225   | H -1.520347 5.247419 -1.039938  | C -0.670734 -0.837436 4.550600  | H 6.615479 2.061110 -0.467242   | C -0.617874 -2.651096 5.151760  |
| C -0.508929 -1.411320 3.317562   | O 0.276725 -0.532709 -1.367715  | C 2.309059 -1.309313 3.716299   | C 4.715062 -3.479496 -1.264128  | C -1.299465 -3.595658 4.372901  |
| C -0.153074 -2.515562 2.519927   | O 0.735563 0.261225 0.991702    | C 3.329583 -1.516427 2.788852   | H 5.477964 -2.757859 -1.576373  | C -0.986800 -3.723511 3.011795  |
| C 0.858744 -3.389930 2.926635    | C -6.075685 -0.189668 -1.035463 | C 2.594544 2.449667 -0.916341   | H 4.943404 -3.768800 -0.232045  | C -0.001308 -2.915343 2.436205  |
| C 1.524570 -3.181521 4.141869    | H -6.380747 -0.212217 0.016624  | C 1.566938 3.399794 -1.386993   | H 4.814975 -4.369361 -1.890888  | C 3.042520 -0.917782 3.251646   |
| C 1.168545 -2.093327 4.948736    | H -6.217699 0.835368 -1.394720  | C 0.758676 3.097296 -2.499678   | C 4.646424 -2.203254 2.977599   | C 3.811497 -0.261500 2.296702   |
| C 0.158111 -1.217003 4.541915    | H -6.749930 -0.841506 -1.596533 | C -0.165183 4.033190 -2.977940  | H 4.747324 -2.525398 4.017007   | C 0.941638 3.256692 -0.173698   |
| C -2.601618 0.034866 3.754504    | C -4.201592 4.238882 -0.195836  | C -0.290638 5.280759 -2.355595  | H 4.739438 -3.090627 2.341089   | C -0.410351 3.779285 0.085860   |
| C -3.461841 0.747620 2.920585    | H -4.971132 3.785985 -0.830494  | C 0.518185 5.594148 -1.254646   | H 5.488746 -1.543332 2.742898   | C -1.201266 3.283494 1.140030   |
| C -2.787468 -1.731549 -1.814423  | H -4.541022 4.149101 0.842283   | C 1.445066 4.662609 -0.777272   | S -3.638049 1.170034 0.186670   | C -2.453575 3.845364 1.408834   |
| C -1.865658 -2.715464 -2.425469  | H -4.146499 5.303059 -0.439173  | C 3.980769 2.686233 -0.857183   | C -3.676587 1.909255 -1.482269  | C -2.936802 4.907075 0.633502   |
| C -0.862644 -2.334031 -3.335388  | C -4.705155 1.502250 3.275423   | C 4.564644 1.491064 -0.438320   | H -2.706668 2.397002 -1.602762  | C -2.158184 5.404169 -0.419287  |
| C -0.058248 -3.300901 -3.946969  | H -4.891876 1.418487 4.348921   | C 1.191632 -2.515889 -1.941245  | H -3.781830 1.140632 -2.252041  | C -0.905168 4.846901 -0.689291  |
| C -0.244983 -4.660216 -3.663342  | H -4.619676 2.567299 3.031574   | C -0.145133 -2.586869 -2.554520 | H -4.474041 2.650069 -1.579110  | C 2.072019 4.004683 -0.565092   |
| C -1.247255 -5.050275 -2.767307  | H -5.583433 1.115662 2.746756   | C -0.869031 -1.427554 -2.892576 | C -5.131232 0.186342 0.258334   | C 3.130467 3.102222 -0.628704   |
| C -2.056036 -4.084822 -2.157498  | S 3.689011 -1.283679 -0.011346  | C -2.118573 -1.528637 -3.512569 | C -5.269844 -0.670300 1.370258  | H -1.691075 0.878394 -1.557610  |
| C -4.190774 -1.745663 -1.940742  | C 3.585312 -1.565505 -1.813179  | C -2.665956 -2.783675 -3.807028 | C -6.152954 0.229979 -0.705747  | H 4.565920 0.725962 -0.231778   |
| C -4.663770 -0.653238 -1.217075  | H 2.561693 -1.898729 -1.998442  | C -1.952932 -3.942497 -3.475113 | C -6.411022 -1.462816 1.510326  | H -0.165623 -2.953707 -0.965315 |

|                                 |                                 |                                 |                                |                                 |
|---------------------------------|---------------------------------|---------------------------------|--------------------------------|---------------------------------|
| H -2.156880 -4.228032 -1.701345 | H -6.450149 1.478385 -2.458730  | H 0.323167 -4.998880 -4.592103  | N 4.404039 2.569796 1.534022   | H 8.798740 -0.073296 -2.299422  |
| H -2.674217 -4.448237 -4.128609 | <sup>3</sup> TS <sub>SO,a</sub> | H 1.099223 -6.204728 -2.554477  | N 3.214856 -0.177251 0.871090  | H 8.676006 -1.943865 -3.940637  |
| H -1.177924 -3.379066 -5.808553 | Fe -0.328246 -0.113629 0.035300 | H 0.482378 -5.338659 -0.300754  | N 4.225121 0.046482 -0.025802  | H 6.683226 -3.438963 -3.957642  |
| H 0.799999 -2.084338 -5.067255  | N -3.039251 0.551490 1.136413   | H -0.908687 -3.294752 -0.093070 | B 2.413077 1.002144 1.498438   | H 4.827802 -3.054398 -2.363332  |
| H 3.229827 -2.290485 -4.009886  | N -1.854298 -0.032040 1.480390  | H -3.540731 -2.258691 -3.637291 | C 1.226734 2.369218 -1.684829  | H 4.020834 -3.240304 0.071497   |
| H 0.893430 -1.112915 5.182737   | N -2.981462 -0.044597 -1.305838 | H 1.412617 1.570873 -2.104537   | C 1.441667 2.688994 -3.109933  | O 4.987962 3.859592 -1.438623   |
| H -0.852058 -2.544507 6.206419  | N -1.871208 -0.829895 -1.183988 | H 3.806120 2.011502 -2.586500   | C 2.674883 3.148462 -3.613826  | O 6.148650 2.522386 -1.762302   |
| H -2.058182 -4.229299 4.821182  | N -2.269020 2.266564 -0.556801  | H 4.896110 4.083127 -1.744375   | C 2.832239 3.412313 -4.979494  | C 2.446719 1.816442 4.564346    |
| H -1.500749 -4.461310 2.403382  | N -0.930224 2.019204 -0.642604  | H 3.568184 5.720252 -0.414770   | C 1.766584 3.230685 -5.868761  | H 1.416426 2.106635 4.329541    |
| H 0.254345 -3.029729 1.388905   | B -3.247823 1.101058 -0.300531  | H 1.174145 5.289565 0.049476    | C 0.535341 2.777611 -5.378879  | H 2.464133 0.724627 4.654903    |
| H 3.356229 -1.219252 4.238395   | C -1.929200 -0.353727 2.793184  | H -1.135881 5.301331 -0.932280  | C 0.375915 2.507165 -4.017733  | H 2.700687 2.239243 5.540009    |
| H -0.834807 2.459108 1.740395   | C -0.881985 -1.071603 3.541277  | O 0.867339 -0.698681 -1.113722  | C -0.026396 2.238385 -1.037726 | C 1.969303 -2.114364 1.923153   |
| H -3.047321 3.461232 2.232704   | C -0.202421 -2.172835 2.989380  | O 0.963307 0.336820 1.277139    | C 0.244948 1.812104 0.256243   | H 2.124225 -1.815325 2.965579   |
| H -3.907144 5.343691 0.848184   | C 0.756772 -2.865817 3.733678   | C -5.080444 0.133423 -2.705939  | C 5.108172 3.293758 2.436118   | H 0.952707 -1.814131 1.645536   |
| H -2.525885 6.222987 -1.029696  | C 1.047992 -2.474762 5.046939   | H -5.811607 0.107018 -1.890081  | C 6.321934 4.072198 2.130211   | H 2.023143 -3.204968 1.872845   |
| H -0.309596 5.227814 -1.512638  | C 0.369477 -1.387090 5.610713   | H -4.952955 1.182749 -2.994577  | C 7.191850 3.726854 1.078853   | C -0.720241 1.504629 1.359734   |
| H 2.120236 5.067846 -0.736959   | C -0.589252 -0.693597 4.865838  | H -5.506680 -0.401174 -3.558910 | C 8.351483 4.471504 0.839459   | H -1.735380 1.752453 1.038303   |
| O -1.085698 -0.060508 1.060938  | C -3.185380 0.052907 3.293732   | C -3.897720 4.207073 -0.592216  | C 8.671920 5.567810 1.649602   | H -0.704720 0.444400 1.636738   |
| O -0.791672 0.571742 -1.751202  | C -3.866340 0.620465 2.220557   | H -4.554096 3.795818 -1.367038  | C 7.816595 5.918631 2.702259   | H -0.502099 2.079926 2.266138   |
| C 5.223888 0.226527 2.399735    | C -1.978377 -1.815951 -2.104972 | H -4.387434 4.035068 0.373287   | C 6.654040 5.179828 2.938692   | S 3.727393 5.690793 -1.222758   |
| H 5.875564 -0.243657 1.654693   | C -1.068917 -2.970381 -2.217511 | H -3.830829 5.287669 -0.744323  | C 4.505615 3.156857 3.709041   | C 5.220722 6.726872 -1.312102   |
| H 5.294786 1.310761 2.255378    | C -0.719570 -3.472552 -3.485439 | C -5.247506 1.198978 2.188376   | C 3.417953 2.310755 3.536691   | H 5.643806 6.545545 -2.301733   |
| H 5.621331 -0.006462 3.391199   | C 0.060979 -4.627603 -3.606356  | H -5.715101 1.084313 3.169792   | C 4.655616 -1.164048 -0.453267 | H 4.969622 7.785353 -1.208752   |
| C 4.562613 3.367190 -0.977613   | C 0.500408 -5.304359 -2.461401  | H -5.241179 2.266943 1.942573   | C 5.756534 -1.349809 -1.414121 | H 5.951709 6.422088 -0.561427   |
| H 5.241654 3.089129 -0.164227   | C 0.155295 -4.814581 -1.193401  | H -5.882802 0.699024 1.449192   | C 6.890469 -0.515395 -1.408337 | C 3.020383 6.116227 0.363313    |
| H 4.876016 2.810790 -1.868142   | C -0.623436 -3.659572 -1.073328 | S 2.447916 -1.425926 -0.310367  | C 7.932620 -0.727106 -2.317306 | C 1.718131 5.636075 0.615038    |
| H 4.698234 4.432177 -1.183233   | C -3.163502 -1.625886 -2.850128 | C 2.885201 -2.209117 -1.891961  | C 7.864860 -1.779631 -3.238500 | C 3.678000 6.878263 1.344417    |
| C 5.219878 -0.638770 -2.515789  | C -3.781272 -0.500391 -2.314991 | H 2.076440 -2.902144 -2.118873  | C 6.745162 -2.621610 -3.246085 | C 1.087126 5.922900 1.827810    |
| H 5.600457 -1.171840 -3.391019  | C -0.325721 3.219861 -0.795069  | H 2.945254 -1.463561 -2.687833  | C 5.700349 -2.409115 -2.342350 | H 1.205832 5.041079 -0.134673   |
| H 5.416720 0.429310 -2.661220   | C 1.120214 3.404763 -1.005225   | H 3.827511 -2.753048 -1.795821  | C 3.900028 -2.174479 0.178694  | C 3.032327 7.165110 2.553963    |
| H 5.800482 -0.960442 -1.644152  | C 1.882429 2.478891 -1.743899   | C 3.943848 -0.492398 0.039640   | C 2.997610 -1.518684 1.011498  | H 4.684403 7.242654 1.182292    |
| S -2.787089 -1.116354 0.997433  | C 3.233208 2.728607 -2.008612   | C 4.085477 -0.023833 1.363849   | H 5.978421 2.415437 -2.713704  | C 1.739557 6.691584 2.801753    |
| C -3.210431 -0.606852 2.685047  | C 3.847712 3.894830 -1.535968   | C 4.955705 -0.230108 -0.903179  | H 1.644943 0.562809 2.298752   | H 0.083372 5.551478 2.007961    |
| H -2.549842 -1.172254 3.343371  | C 3.100176 4.816049 -0.791514   | C 5.234672 0.674560 1.737117    | H 3.502361 3.332815 -2.937535  | H 3.547478 7.758981 3.302457    |
| H -3.011465 0.458358 2.812231   | C 1.748682 4.574653 -0.530924   | H 3.286093 -0.197833 2.075661   | H 3.789833 3.770929 -5.344994  | H 1.245176 6.918190 3.740608    |
| H -4.252967 -0.845911 2.907274  | C -1.300970 4.244795 -0.794116  | C 6.103610 0.471526 -0.515343   | H 1.892297 3.438957 -6.926451  | <sup>3</sup> TS <sub>SO,b</sub> |
| C -3.977050 -0.268662 -0.010596 | C -2.526242 3.606662 -0.642205  | H 4.864630 -0.567228 -1.927947  | H -0.298996 2.626927 -6.056815 | Fe 4.355211 2.039098 -0.556967  |
| C -4.076582 -0.704446 -1.351131 | H 1.324476 1.205848 1.034174    | C 6.248880 0.924630 0.800597    | H -0.576943 2.132189 -3.660335 | N 1.598335 1.687717 0.325386    |
| C -4.767357 0.808876 0.433640   | H -4.372720 1.486865 -0.417573  | H 5.338305 1.024990 2.758789    | H -1.001756 2.433503 -1.452351 | N 2.234917 2.031904 -0.836957   |
| C -4.964520 -0.073429 -2.224282 | H -0.434702 -2.492985 1.979766  | H 6.882427 0.663056 -1.246704   | H 6.961841 2.889341 0.433926   | N 3.337459 2.013053 2.188570    |
| H -3.457385 -1.523341 -1.703065 | H 1.269910 -3.714574 3.292325   | H 7.140373 1.468716 1.094406    | H 9.004463 4.190269 0.019391   | N 4.384562 2.557433 1.501430    |
| C -5.657718 1.426585 -0.450901  | H 1.791573 -3.014067 5.625083   | <sup>5</sup> TS <sub>SO,b</sub> | H 9.574853 6.140919 1.464005   | N 3.217486 -0.151858 0.893842   |
| H -4.692726 1.169308 1.451618   | H 0.588581 -1.076697 6.627574   | Fe 4.420343 2.139831 -0.624189  | H 8.051939 6.768310 3.335833   | N 4.198926 0.107608 -0.023420   |
| C -5.760252 0.991521 -1.777870  | H -1.102674 0.157497 5.301805   | N 1.604106 1.709532 0.371174    | H 5.987612 5.472284 3.743281   | B 2.385157 1.014799 1.490799    |
| H -5.034029 -0.413293 -3.252057 | H -3.559878 -0.089342 4.294608  | N 2.210121 2.067079 -0.801607   | H 4.839968 3.588635 4.638228   | C 1.275976 2.351629 -1.740092   |
| H -6.267102 2.253395 -0.100982  | H -1.054532 -2.949227 -4.375368 | N 3.378387 1.973335 2.211458    | H 6.954643 0.296899 -0.694989  | C 1.522665 2.664962 -3.161265   |

|                                |                                |                                 |                                 |                                 |
|--------------------------------|--------------------------------|---------------------------------|---------------------------------|---------------------------------|
| C 2.756733 3.156888 -3.631305  | O 5.923630 2.350503 -1.783382  | C 4.379432 -1.566137 -0.103513  | H 2.265722 -1.742668 -4.818337  | C 0.752583 -3.395185 -3.424975  |
| C 2.943759 3.422334 -4.992909  | C 2.335007 2.026537 4.513896   | C 1.294690 2.771231 -1.407255   | H 3.170731 -2.957275 -3.913781  | C -0.136305 -2.504868 -2.813093 |
| C 1.908046 3.208993 -5.910497  | H 1.318917 2.326715 4.233602   | C 0.467240 3.742356 -0.673086   | H 1.768969 -3.440312 -4.881055  | C -2.613883 0.173870 -3.542491  |
| C 0.676700 2.723241 -5.453595  | H 2.323707 0.941305 4.664563   | C 0.069728 4.939911 -1.305307   | C 5.359937 -2.098086 -1.103484  | C -3.377476 0.807371 -2.567537  |
| C 0.487160 2.451579 -4.096252  | H 2.571552 2.497643 5.471590   | C -0.676966 5.900147 -0.617038  | H 6.201533 -2.561519 -0.581573  | C -0.366848 3.242955 0.744619   |
| C 0.007757 2.241090 -1.118453  | C 2.071644 -2.121138 1.990040  | C -1.045910 5.683431 0.717604   | H 4.911601 -2.856220 -1.756135  | C 1.024885 3.649162 0.484304    |
| C 0.244353 1.817166 0.183132   | H 2.235705 -1.803794 3.025912  | C -0.660241 4.497242 1.354784   | H 5.756959 -1.307052 -1.749545  | C 1.610917 3.440582 -0.780503   |
| C 5.076678 3.328748 2.370399   | H 1.039685 -1.860232 1.729011  | C 0.092818 3.536682 0.669880    | S -2.683849 1.509056 0.058923   | C 2.893110 3.925251 -1.059844   |
| C 6.320119 4.045966 2.040410   | H 2.163245 -3.209737 1.951878  | C 2.191925 3.049024 -2.463469   | C -3.208938 2.720951 -1.211604  | C 3.616025 4.621853 -0.080860   |
| C 7.205638 3.585691 1.047443   | C -0.746407 1.534338 1.270396  | C 2.792440 1.837769 -2.788125   | H -2.354771 3.370687 -1.411091  | C 3.046297 4.825216 1.183129    |
| C 8.395274 4.270094 0.780328   | H -1.753585 1.774999 0.919941  | C -0.392846 -2.626058 -1.533655 | H -3.500830 2.181159 -2.115564  | C 1.762037 4.346280 1.461873    |
| C 8.730436 5.420045 1.506280   | H -0.736807 0.480512 1.570940  | C -1.540200 -3.101389 -0.743127 | H -4.045932 3.307636 -0.824248  | C -1.347707 3.990945 1.438299   |
| C 7.860989 5.883973 2.501877   | H -0.549973 2.129753 2.168981  | C -1.629376 -2.874571 0.644662  | C -4.243112 0.583884 0.160332   | C -2.537638 3.286404 1.285532   |
| C 6.668192 5.204373 2.765773   | S 3.630028 5.545882 -1.017669  | C -2.697390 -3.393384 1.383294  | C -5.182498 0.978143 1.123124   | H 1.406992 0.355216 1.634286    |
| C 4.440765 3.281487 3.634200   | C 5.106568 6.592637 -1.203246  | C -3.689453 -4.157403 0.756386  | C -4.488726 -0.493407 -0.696669 | H -4.319117 1.450773 0.012658   |
| C 3.344792 2.440181 3.488091   | H 5.517578 6.344990 -2.183428  | C -3.611529 -4.389053 -0.622912 | C -6.403507 0.298210 1.203823   | H -0.418968 -3.182716 0.390605  |
| C 4.676311 -1.086272 -0.448622 | H 4.844025 7.652957 -1.173497  | C -2.550598 -3.863593 -1.365283 | H -4.963681 1.795835 1.803838   | H 1.174035 -4.967321 1.031953   |
| C 5.762842 -1.253815 -1.431103 | H 5.852375 6.353250 -0.443298  | C 0.090619 -3.179747 -2.742104  | C -5.710330 -1.170360 -0.602934 | H 1.344701 -5.695508 3.408706   |
| C 6.932558 -0.471846 -1.388650 | C 2.971308 6.034876 0.571598   | C 1.244257 -2.471665 -3.058466  | H -3.726585 -0.808244 -1.400523 | H -0.100391 -4.622960 5.131102  |
| C 7.962283 -0.683406 -2.311934 | C 1.712274 5.498941 0.914925   | H 0.169394 0.077977 2.697259    | C -6.667683 -0.771973 0.339162  | H -1.685544 -2.831990 4.484462  |
| C 7.845013 -1.682659 -3.285939 | C 3.617907 6.906226 1.465313   | H 3.478569 -0.854297 -2.668645  | H -7.138199 0.596244 1.944408   | H -3.966983 -2.435271 3.193694  |
| C 6.689389 -2.473126 -3.330928 | C 1.113881 5.836871 2.130974   | H 2.265903 1.336920 2.812928    | H -5.906789 -2.012877 -1.256709 | H -0.254475 -0.109418 -5.230681 |
| C 5.658266 -2.261907 -2.410934 | H 1.206374 4.824208 0.231048   | H 1.674145 1.758430 5.184764    | H -7.612321 -1.301513 0.407916  | H 1.314918 -1.688675 -6.320433  |
| C 3.974301 -2.121968 0.208785  | C 3.004417 7.243549 2.678741   | H 2.008150 -0.024286 6.891989   | <b><sup>3</sup>PC</b>           | H 1.961772 -3.803008 -5.170963  |
| C 3.059803 -1.499945 1.051958  | H 4.590651 7.319679 1.231720   | H 2.929556 -2.233151 6.202397   | Fe -0.338456 -0.162906 0.110559 | H 1.019237 -4.319647 -2.922067  |
| H 5.656346 2.240597 -2.712534  | C 1.755349 6.712874 3.017764   | H 3.485238 -2.662663 3.825633   | N -3.121656 -0.178755 0.992086  | H -0.567460 -2.744079 -1.847136 |
| H 1.606866 0.585998 2.287949   | H 0.142817 5.421803 2.381632   | H 5.215932 -2.060562 1.884128   | N -1.951521 -0.868598 1.116772  | H -2.840436 0.097350 -4.593906  |
| H 3.554709 3.362662 -2.925659  | H 3.509751 7.923117 3.357932   | H 0.338783 5.111066 -2.342450   | N -2.749993 0.605089 -1.370481  | H 1.048222 2.909426 -1.539371   |
| H 3.900243 3.807235 -5.334088  | H 1.285599 6.978886 3.958912   | H -0.972235 6.814601 -1.121893  | N -1.606602 -0.120401 -1.544892 | H 3.322387 3.772218 -2.045679   |
| H 2.057056 3.418140 -6.965031  | <b><sup>5</sup>PC</b>          | H -1.622379 6.430361 1.253846   | N -2.249528 2.175785 0.539358   | H 4.606388 5.007179 -0.302762   |
| H -0.134012 2.548068 -6.153964 | Fe 0.332073 0.069975 0.233594  | H -0.938000 4.318110 2.388588   | N -0.925301 2.131345 0.218784   | H 3.598706 5.360925 1.949026    |
| H -0.464385 2.051786 -3.762628 | N 3.234526 -0.889708 -0.433104 | H 0.388051 2.628762 1.185026    | B -3.191960 1.049469 0.046639   | H 1.325491 4.506545 2.442681    |
| H -0.954551 2.449834 -1.556367 | N 2.550318 -0.523258 0.689787  | H 2.404841 4.008656 -2.905752   | C -2.156727 -1.851862 2.022299  | H -1.218667 4.940830 1.932805   |
| H 6.961188 2.700377 0.474658   | N 2.261541 0.887870 -1.959324  | H -0.868551 -2.290650 1.150351  | C -1.160965 -2.873619 2.391611  | O 1.350727 -0.000328 -1.033053  |
| H 9.061343 3.900918 0.006969   | N 1.342813 1.450160 -1.120546  | H -2.748077 -3.204527 2.450945  | C -0.342304 -3.490055 1.427482  | O 0.698627 -0.307079 1.659228   |
| H 9.656921 5.946654 1.300299   | N 1.426917 -1.537194 -2.076646 | H -4.512408 -4.566101 1.334121  | C 0.555684 -4.497688 1.791156   | C -4.658639 1.567021 -2.722867  |
| H 8.109484 6.774967 3.070323   | N 0.424609 -1.617805 -1.151166 | H -4.375959 -4.978043 -1.120689 | C 0.649123 -4.911371 3.126547   | H -5.480102 1.103044 -2.165368  |
| H 5.991476 5.581820 3.525090   | B 2.652845 -0.610558 -1.841741 | H -2.507306 -4.039976 -2.435227 | C -0.166018 -4.310489 4.093538  | H -4.567201 2.599369 -2.366919  |
| H 4.760387 3.766136 4.542356   | C 3.273414 -0.957019 1.744426  | H -0.318412 -4.012368 -3.290961 | C -1.065323 -3.303622 3.728968  | H -4.941282 1.598066 -3.778509  |
| H 7.033878 0.298154 -0.634339  | C 2.898825 -0.699458 3.146275  | O -1.678897 0.605261 -0.686576  | C -3.488189 -1.773342 2.490087  | C -3.904041 3.623985 1.797311   |
| H 8.856887 -0.070647 -2.265291 | C 2.387660 0.550575 3.550086   | O -0.435749 0.204292 1.951412   | C -4.075540 -0.707501 1.815620  | H -4.648979 3.647159 0.994243   |
| H 8.646138 -1.845913 -3.999780 | C 2.064820 0.789242 4.890968   | C 3.837004 1.564023 -3.826209   | C -1.521781 -0.412480 -2.862773 | H -4.251790 2.899925 2.544078   |
| H 6.589482 -3.249853 -4.082598 | C 2.256850 -0.211220 5.852303  | H 4.765407 1.185935 -3.383906   | C -0.511701 -1.307589 -3.453941 | H -3.887627 4.608178 2.273406   |
| H 4.759254 -2.868611 -2.455858 | C 2.777378 -1.452269 5.463881  | H 3.501554 0.823056 -4.560128   | C 0.024180 -1.029296 -4.726602  | C -5.482230 -0.200979 1.908313  |
| H 4.142193 -3.181829 0.105616  | C 3.095485 -1.694535 4.124013  | H 4.070679 2.487744 -4.362203   | C 0.913024 -1.919758 -5.338883  | H -6.046185 -0.816116 2.614610  |
| O 4.876440 3.720451 -1.319221  | C 4.430499 -1.628821 1.284315  | C 2.163661 -2.658877 -4.226228  | C 1.280518 -3.107219 -4.691719  | H -5.526590 0.836782 2.256623   |



|                                   |                                 |                                 |                                 |                                 |
|-----------------------------------|---------------------------------|---------------------------------|---------------------------------|---------------------------------|
| H -5.994958 -0.240064 0.940695    | C 6.099469 -0.517026 -1.166748  | C 5.986386 7.653705 -0.491733   | C 7.624684 -1.133743 -2.997880  | H 2.034313 9.466630 -0.031905   |
| S 2.427472 -1.113110 -0.813784    | C 6.558915 0.776599 -0.854151   | C 4.572861 7.086424 -0.737642   | C 6.525564 -1.573661 -2.255863  | H 1.697357 9.189896 1.677574    |
| C 3.440684 -0.923337 -2.317201    | C 7.629385 1.339987 -1.555509   | H 2.528259 7.360085 -0.028495   | C 4.558746 -2.653255 -0.098402  | H 3.579946 10.834663 1.356087   |
| H 2.817654 -1.205602 -3.167112    | C 8.266829 0.617832 -2.571487   | H 3.752832 7.450278 1.235670    | C 3.397843 -2.604408 0.668639   | H 4.113953 9.396954 2.228464    |
| H 3.757754 0.118211 -2.404378     | C 7.823821 -0.673656 -2.884911  | H 3.223944 9.570909 -0.926332   | H 3.493061 2.866348 -2.017323   | H 4.546572 9.957354 -0.761158   |
| H 4.308040 -1.584557 -2.245782    | C 6.749858 -1.235744 -2.190401  | H 2.842545 9.723625 0.789446    | H 1.157846 -1.475475 2.003668   | H 5.790170 9.989589 0.489627    |
| C 3.643532 -0.549547 0.404768     | C 4.814392 -2.513978 -0.146293  | H 4.972988 10.933762 0.199010   | H 1.698755 3.794532 -1.034967   | H 5.834853 7.830502 -0.811095   |
| C 4.165695 -1.514604 1.276572     | C 3.632360 -2.614097 0.583297   | H 5.257995 9.649476 1.374534    | H 1.980153 5.561442 -2.744646   | H 5.499067 7.551013 0.897683    |
| C 4.043104 0.790299 0.479134      | H 3.286512 3.469714 -2.055834   | H 5.785008 9.478127 -1.647447   | H 1.159591 5.199831 -5.071117   | H 3.421099 7.616047 -1.362021   |
| C 5.123714 -1.131831 2.222965     | H 1.257683 -1.843964 1.862798   | H 7.013766 9.575466 -0.385348   | H 0.068001 3.042163 -5.668009   | H 3.956065 6.181479 -0.476296   |
| H 3.814548 -2.540571 1.233276     | H 1.251615 3.708485 -0.526132   | H 6.700620 7.209312 -1.197735   | H -0.171976 1.256235 -3.970858  | <sup>5</sup> TS <sub>OO</sub>   |
| C 4.991422 1.163514 1.437903      | H 1.322571 5.713046 -1.974472   | H 6.319124 7.364048 0.517377    | H -1.418778 0.438590 -1.873741  | Fe 3.124098 1.653689 0.221144   |
| H 3.604865 1.534018 -0.176362     | H 0.408295 5.618561 -4.290935   | H 4.287796 7.277533 -1.784460   | H 5.862544 2.282323 2.111313    | N 0.934183 -0.329528 0.399774   |
| C 5.535333 0.204408 2.303301      | H -0.575909 3.494880 -5.141000  | H 4.571208 5.997710 -0.599584   | H 7.489311 4.144877 2.255517    | N 1.155513 0.918274 -0.116362   |
| H 5.532219 -1.871046 2.903495     | H -0.611996 1.477383 -3.705863  | <sup>3</sup> RC                 | H 6.895010 6.231897 3.476295    | N 2.258497 -0.019668 2.531924   |
| H 5.295349 2.202128 1.509507      | H -1.654449 0.240568 -1.665573  | Fe 3.621059 1.505837 0.167392   | H 4.652418 6.441992 4.541006    | N 2.824988 1.203985 2.296916    |
| H 6.269641 0.499950 3.045299      | H 5.052367 2.919043 2.072538    | N 0.961041 0.012255 0.319486    | H 3.015837 4.589009 4.367435    | N 3.294577 -1.272606 0.581164   |
| <b>2.2. Cyclohexane oxidation</b> | H 6.158743 5.102519 2.368656    | N 1.478558 1.042135 -0.412690   | H 2.490339 2.152603 5.234858    | N 4.034328 -0.252570 0.040778   |
| <sup>5</sup> RC                   | H 5.316194 6.719078 4.067674    | N 2.249935 0.439554 2.466241    | H 6.380454 0.951060 0.029783    | B 1.976492 -0.985138 1.354940   |
| Fe 3.257530 1.552865 0.147592     | H 3.332659 6.123827 5.454162    | N 3.154709 1.396224 2.101469    | H 8.297968 1.746099 -1.307535   | C 0.108782 1.216052 -0.923358   |
| N 0.877177 -0.227897 0.345328     | H 2.202344 3.947252 5.135510    | N 3.069154 -1.287300 0.822541   | H 9.116829 0.410192 -3.243417   | C -0.029313 2.497333 -1.635279  |
| N 1.256751 0.922711 -0.285957     | H 2.112411 1.501953 5.491623    | N 3.973894 -0.497963 0.175971   | H 7.976134 -1.722903 -3.838938  | C 0.413539 3.709446 -1.068123   |
| N 2.122231 0.119405 2.533824      | H 6.085701 1.345004 -0.060986   | B 1.804518 -0.637914 1.449372   | H 6.020584 -2.493916 -2.531363  | C 0.261972 4.914686 -1.762801   |
| N 2.805801 1.276501 2.278557      | H 7.965616 2.340586 -1.304320   | C 0.578396 1.320152 -1.383724   | H 5.108655 -3.536912 -0.378872  | C -0.344207 4.931697 -3.025172  |
| N 3.127178 -1.352489 0.715052     | H 9.098757 1.056084 -3.113200   | C 0.757962 2.387831 -2.383373   | O 3.915125 3.307154 -0.176092   | C -0.799582 3.733857 -3.590888  |
| N 3.948219 -0.450813 0.092290     | H 8.309249 -1.239367 -3.673836  | C 1.363333 3.618185 -2.052058   | O 4.258570 2.637518 -1.445645   | C -0.642752 2.527248 -2.903658  |
| B 1.808694 -0.891918 1.401966     | H 6.398652 -2.228785 -2.451641  | C 1.511870 4.621442 -3.019075   | C 0.869457 -0.244538 4.470340   | C -0.788846 0.128575 -0.927155  |
| C 0.284112 1.237092 -1.171903     | H 5.479826 -3.321643 -0.404202  | C 1.047188 4.420350 -4.324667   | H -0.112566 -0.232405 3.983838  | C -0.240115 -0.832701 -0.080289 |
| C 0.330246 2.440628 -2.018363     | O 4.016092 3.240910 -0.288765   | C 0.431011 3.207387 -4.658506   | H 1.201214 -1.288036 4.508356   | C 2.883278 1.854663 3.484481    |
| C 0.873519 3.651345 -1.541549     | O 4.050319 2.948796 -1.740462   | C 0.289387 2.200259 -3.699322   | H 0.740058 0.106961 5.497197    | C 3.452445 3.202037 3.658286    |
| C 0.906106 4.787420 -2.359351     | C 0.993508 -1.067087 4.467904   | C -0.527171 0.447088 -1.267484  | C 2.611634 -3.735483 1.255691   | C 4.577125 3.633040 2.928739    |
| C 0.385664 4.736502 -3.659506     | H 0.005596 -1.198925 4.012075   | C -0.255224 -0.370353 -0.175120 | H 2.519425 -3.646703 2.343647   | C 5.110269 4.909620 3.134323    |
| C -0.170338 3.542635 -4.135505    | H 1.527902 -2.018353 4.367760   | C 3.354131 2.195095 3.176731    | H 1.596453 -3.785490 0.845857   | C 4.536245 5.772592 4.076005    |
| C -0.197517 2.404616 -3.323546    | H 0.848015 -0.872983 5.533763   | C 4.318411 3.308181 3.215584    | H 3.109586 -4.682938 1.034242   | C 3.422150 5.350658 4.813061    |
| C -0.732311 0.259658 -1.107527    | C 2.989898 -3.840653 1.153792   | C 5.591766 3.197780 2.625606    | C -1.095060 -1.465810 0.407283  | C 2.885062 4.077134 4.606664    |
| C -0.328542 -0.654165 -0.136888   | H 2.864011 -3.768453 2.239497   | C 6.511172 4.246703 2.714683    | H -2.039506 -1.533883 -0.138987 | C 2.334120 1.027801 4.487640    |
| C 2.870735 1.966698 3.438684      | H 1.999288 -4.023097 0.722261   | C 6.178322 5.420202 3.403391    | H -0.600335 -2.441827 0.344610  | C 1.948951 -0.151773 3.854556   |
| C 3.542883 3.269733 3.581248      | H 3.614025 -4.712700 0.942813   | C 4.917775 5.537113 4.003579    | H -1.327109 -1.286955 1.462996  | C 5.087785 -0.810970 -0.602878  |
| C 4.666272 3.616290 2.806595      | C -1.038410 -1.881403 0.345848  | C 3.995729 4.490029 3.911290    | C 2.679888 7.519831 0.674949    | C 6.140635 -0.040063 -1.285746  |
| C 5.296079 4.853194 2.977956      | H -1.991140 -1.984910 -0.179700 | C 2.539135 1.743649 4.238682    | C 2.446941 9.029442 0.890808    | C 6.610306 1.187222 -0.781529   |
| C 4.822997 5.761854 3.932830      | H -0.453917 -2.790619 0.165940  | C 1.854934 0.630714 3.760046    | C 3.759542 9.756226 1.249777    | C 7.628881 1.882242 -1.440365   |
| C 3.709792 5.425136 4.714010      | H -1.247954 -1.836319 1.420250  | C 4.894862 -1.312843 -0.390689  | C 4.853198 9.499307 0.192278    | C 8.202211 1.359306 -2.605566   |
| C 3.075206 4.192660 4.539232      | C 3.534108 7.741010 0.196826    | C 6.047262 -0.822053 -1.163501  | C 5.085929 7.989590 -0.023580   | C 7.749104 0.133820 -3.110457   |
| C 2.209628 1.233958 4.452068      | C 3.556068 9.279245 0.082336    | C 6.708129 0.375707 -0.829911   | C 3.774549 7.259659 -0.380903   | C 6.727806 -0.559976 -2.456810  |
| C 1.749137 0.069125 3.850363      | C 4.970831 9.843103 0.329300    | C 7.803059 0.819144 -1.578460   | H 1.742506 7.031031 0.376641    | C 5.006438 -2.213679 -0.478510  |
| C 4.985995 -1.143486 -0.435072    | C 6.008865 9.191809 -0.607979   | C 8.265573 0.066663 -2.664780   | H 2.985206 7.060283 1.627360    | C 3.865193 -2.474807 0.275526   |

|                                 |                                 |                                |                                 |                                 |
|---------------------------------|---------------------------------|--------------------------------|---------------------------------|---------------------------------|
| H 2.780315 3.109324 -2.074514   | H 6.319089 9.158808 -1.646119   | H 0.686119 5.383406 -4.722461  | H 3.659386 7.451296 -1.425882   | H 0.885865 -0.611848 -3.335954  |
| H 1.534608 -2.011735 1.771040   | H 7.317018 9.194755 -0.191534   | H -0.394310 3.230431 -5.356426 | H 4.159798 6.074447 -0.435814   | H 3.119650 -1.395153 -4.070297  |
| H 0.862929 3.713209 -0.081080   | H 7.015189 6.845141 -1.055702   | H -0.476126 1.356210 -3.741667 | <sup>5</sup> IM <sub>OO</sub>   | H 3.780370 -3.773314 -3.745341  |
| H 0.609527 5.838656 -1.312248   | H 6.352799 7.030088 0.568859    | H -1.550783 0.390170 -1.637169 | Fe -0.388385 0.038869 0.009306  | H 2.178900 -5.367110 -2.696126  |
| H -0.462417 5.867898 -3.560788  | H 4.746294 7.048819 -2.049289   | H 5.816984 2.431307 2.061588   | N -3.098734 -0.553482 1.121167  | H -0.062559 -4.581419 -1.978330 |
| H -1.268049 3.738016 -4.569788  | H 4.745483 5.759483 -0.841692   | H 7.286412 4.414255 2.251239   | N -1.774872 -0.738570 1.394032  | H -2.365966 -3.514055 -3.434628 |
| H -0.977476 1.599621 -3.356430  | <sup>3</sup> TS <sub>OO</sub>   | H 6.582977 6.365263 3.628709   | N -2.811215 -1.086188 -1.298998 | H 0.779370 2.381819 -1.630661   |
| H -1.731084 0.065046 -1.446720  | Fe 3.574252 1.554092 0.189557   | H 4.386245 6.318198 4.803028   | N -1.444882 -1.137617 -1.358380 | H 2.806394 3.800146 -1.613817   |
| H 5.036079 2.969623 2.205745    | N 0.962484 -0.074511 0.391856   | H 2.905906 4.342505 4.590231   | N -3.083028 1.330823 -0.574214  | H 2.750763 6.057579 -0.561772   |
| H 5.976773 5.225916 2.562818    | N 1.405510 1.009654 -0.309238   | H 2.651711 1.826595 5.340524   | N -1.763995 1.681285 -0.496492  | H 0.636558 6.884686 0.465493    |
| H 4.953450 6.761639 4.235264    | N 2.354112 0.277968 2.481632    | H 6.538597 0.923828 0.158268   | B -3.521804 -0.127689 -0.310681 | H -1.389469 5.464340 0.450711   |
| H 2.969205 6.013787 5.543194    | N 3.168462 1.318679 2.132255    | H 8.436957 1.877153 -1.108752  | C -1.675452 -1.164531 2.676734  | H -3.282180 4.565768 -0.949128  |
| H 2.011858 3.761266 5.168562    | N 3.149976 -1.301811 0.680873   | H 9.096683 0.897729 -3.300591  | C -0.412949 -1.570784 3.152900  | O 0.891039 0.226034 -0.986182   |
| H 2.262225 1.245730 5.540799    | N 4.010173 -0.430273 0.075162   | H 7.827738 -1.038190 -4.219077 | C 0.564178 -2.296768 2.607654   | O 0.435523 0.787633 1.436441    |
| H 6.187161 1.597372 0.127955    | B 1.896276 -0.754816 1.422527   | H 5.899513 -1.966854 -2.968658 | C 1.742139 -2.705127 3.239516   | C -4.825449 -2.233695 -2.302127 |
| H 7.976059 2.829306 -1.040398   | C 0.444930 1.309361 -1.212178   | H 5.215047 -3.369256 -0.778732 | C 1.958428 -2.404493 4.590479   | H -5.320799 -2.516609 -1.366736 |
| H 8.993414 1.900276 -3.114513   | C 0.533260 2.431696 -2.163228   | O 3.792442 3.237542 -0.043581  | C 0.986209 -1.694976 5.306604   | H -5.317487 -1.327059 -2.670848 |
| H 8.185327 -0.277353 -4.015240  | C 1.131677 3.658741 -1.810120   | O 4.164002 2.535030 -1.556877  | C -0.191366 -1.283651 4.675390  | H -4.996566 -3.031063 -3.029545 |
| H 6.367033 -1.499502 -2.863003  | C 1.191083 4.711914 -2.731645   | C 1.156770 -0.629389 4.514576  | C -2.970326 -1.226186 3.232653  | C -5.350424 2.409709 -0.892349  |
| H 5.707673 -2.939712 -0.856279  | C 0.642273 4.564811 -4.011449   | H 0.148058 -0.663166 4.087612  | C -3.849576 -0.836375 2.223299  | H -5.670201 1.776947 -1.727565  |
| O 3.749135 3.236445 -0.188597   | C 0.032711 3.354409 -4.366211   | H 1.565311 -1.644788 4.466206  | C -1.112790 -2.128619 -2.225448 | H -5.839431 2.028288 0.011136   |
| O 3.509657 2.497035 -1.866383   | C -0.019654 2.297558 -3.453001  | H 1.067255 -0.350483 5.567567  | C 0.259788 -2.538616 -2.597980  | H -5.722319 3.421390 -1.073440  |
| C 1.320224 -1.373078 4.450385   | C -0.626510 0.394523 -1.082019  | C 2.779527 -3.790084 0.908016  | C 1.168097 -1.647890 -3.198682  | C -5.342987 -0.739464 2.262194  |
| H 0.317187 -1.553757 4.047305   | C -0.268701 -0.471312 -0.055030 | H 2.704779 -3.790990 2.000654  | C 2.429347 -2.092985 -3.607525  | H -5.706067 -1.049635 3.245176  |
| H 1.915518 -2.272567 4.259968   | C 3.380163 2.062077 3.244512    | H 1.759485 -3.845627 0.511069  | C 2.800816 -3.431563 -3.426397  | H -5.689998 0.284693 2.083850   |
| H 1.230115 -1.249342 5.532468   | C 4.251919 3.248163 3.303647    | H 3.307723 -4.696881 0.602896  | C 1.900455 -4.327649 -2.837638  | H -5.813962 -1.380129 1.508677  |
| C 3.321979 -3.799000 0.715754   | C 5.497515 3.284703 2.648663    | C -1.038101 -1.624040 0.513849 | C 0.636561 -3.885606 -2.431909  | C 4.982629 1.541007 0.499422    |
| H 3.262922 -3.873983 1.807082   | C 6.328942 4.402721 2.761942    | H -2.011218 -1.694705 0.020855 | C -2.296909 -2.715051 -2.714517 | C 6.503311 1.652422 0.735181    |
| H 2.316169 -3.980943 0.321283   | C 5.934248 5.500050 3.537688    | H -0.518853 -2.578394 0.368904 | C -3.353600 -2.032036 -2.116090 | C 7.147366 0.263352 0.926292    |
| H 3.973622 -4.599430 0.356634   | C 4.699875 5.472161 4.199848    | H -1.212046 -1.509337 1.589536 | C -1.695848 3.027121 -0.625815  | C 6.825060 -0.677106 -0.253773  |
| C -0.788779 -2.176418 0.287781  | C 3.866453 4.355674 4.085201    | C 2.826223 7.468956 0.577652   | C -0.453868 3.822284 -0.598244  | C 5.304093 -0.786418 -0.487072  |
| H -1.753652 -2.326053 -0.203100 | C 2.665739 1.485925 4.317981    | C 2.575772 8.986900 0.693649   | C 0.744682 3.365202 -1.178129   | C 4.661447 0.602261 -0.681920   |
| H -0.123172 -2.989009 -0.024374 | C 2.030441 0.358890 3.806279    | C 3.866736 9.744210 1.067858   | C 1.890832 4.167406 -1.160691   | H 4.551241 2.535378 0.321893    |
| H -0.939123 -2.274406 1.368316  | C 4.939272 -1.164577 -0.584836  | C 5.009036 9.433933 0.078238   | C 1.859868 5.437687 -0.572253   | H 4.505231 1.149291 1.411638    |
| C 3.692009 7.562018 -0.224090   | C 6.070205 -0.577709 -1.324264  | C 5.258903 7.915949 -0.037718  | C 0.670585 5.903394 0.002707    | H 6.966801 2.148372 -0.132030   |
| C 3.819175 9.095962 -0.326417   | C 6.802907 0.508019 -0.808412   | C 3.969224 7.156111 -0.410520  | C -0.475715 5.104122 -0.011014  | H 6.707663 2.287635 1.607598    |
| C 5.199977 9.580006 0.163366    | C 7.883751 1.038650 -1.519146   | H 1.905819 6.956259 0.266576   | C -3.004248 3.536509 -0.790559  | H 8.234651 0.362721 1.046629    |
| C 6.345208 8.866558 -0.584765   | C 8.257167 0.485680 -2.750174   | H 3.089741 7.068237 1.568411   | C -3.859460 2.440952 -0.754056  | H 6.766288 -0.184481 1.857214   |
| C 6.215897 7.332565 -0.481421   | C 7.544127 -0.604284 -3.265560  | H 2.202735 9.366136 -0.270621  | H 1.305536 1.114479 1.153067    | H 7.302586 -0.287422 -1.166439  |
| C 4.836060 6.845299 -0.970615   | C 6.460431 -1.132989 -2.558755  | H 1.790546 9.187021 1.435265   | H -4.705095 -0.222134 -0.428182 | H 7.255359 -1.671590 -0.073514  |
| H 2.721000 7.235288 -0.620840   | C 4.648343 -2.532092 -0.404722  | H 3.676621 10.825561 1.101320  | H 0.393640 -2.556792 1.567793   | H 5.095313 -1.424898 -1.355743  |
| H 3.714006 7.266111 0.836172    | C 3.511147 -2.586462 0.400346   | H 4.177660 9.446554 2.081308   | H 2.485704 -3.264171 2.680392   | H 4.840611 -1.278218 0.382638   |
| H 3.682877 9.400072 -1.375963   | H 3.349689 2.814253 -2.022023   | H 4.744166 9.832829 -0.913447  | H 2.872744 -2.723360 5.080512   | H 5.048619 1.049685 -1.611338   |
| H 3.021024 9.584063 0.249340    | H 1.325003 -1.656131 1.957852   | H 5.928965 9.947963 0.388451   | H 1.146560 -1.457593 6.353467   | H 3.575577 0.502165 -0.805115   |
| H 5.286469 10.668262 0.041435   | H 1.537983 3.789576 -0.813313   | H 6.043788 7.716883 -0.779790  | H -0.934226 -0.718215 5.228817  | <sup>3</sup> IM <sub>OO</sub>   |
| H 5.291412 9.374559 1.241315    | H 1.658079 5.648087 -2.442499   | H 5.631915 7.535479 0.925640   | H -3.233586 -1.557390 4.224060  | Fe -0.452792 0.201881 -0.247898 |

|                                 |                                 |                                 |                                 |                                 |
|---------------------------------|---------------------------------|---------------------------------|---------------------------------|---------------------------------|
| N -2.863006 -0.373733 1.427037  | H -0.316688 -4.852416 -1.162605 | N -3.127801 0.871397 -0.386589  | H 1.793906 6.503562 -0.931693   | C 0.338530 -1.501964 3.274095   |
| N -1.501769 -0.440285 1.487791  | H -2.697923 -4.114501 -2.444549 | N -1.889820 1.446241 -0.412924  | H -0.367153 7.033176 0.190428   | C 1.383078 -2.054122 2.508503   |
| N -2.961144 -1.251844 -0.903635 | H 0.435537 2.380962 -2.542700   | B -3.272569 -0.643970 -0.125420 | H -2.122470 5.301269 0.385097   | C 2.655074 -2.226276 3.063063   |
| N -1.614906 -1.302099 -1.128660 | H 2.436819 3.804323 -2.865637   | C -1.097923 -1.327535 2.740507  | H -3.926967 4.013645 -0.744167  | C 2.902923 -1.853397 4.390469   |
| N -3.107937 1.230639 -0.485464  | H 2.718344 5.890628 -1.535916   | C 0.252004 -1.506471 3.298822   | O 1.056879 0.348830 -1.143268   | C 1.868004 -1.309839 5.161835   |
| N -1.784570 1.548221 -0.600915  | H 0.964815 6.553605 0.104811    | C 1.279447 -2.102042 2.542596   | O 0.517193 1.030441 1.364842    | C 0.595003 -1.139085 4.609868   |
| B -3.522209 -0.168656 0.040298  | H -1.041492 5.132076 0.419014   | C 2.544444 -2.308007 3.101409   | C -4.330789 -2.899442 -2.077911 | C -2.231083 -1.701294 3.367336  |
| C -1.165890 -0.710373 2.770146  | H -3.257245 4.428979 -1.120068  | C 2.801173 -1.928607 4.425261   | H -4.699436 -3.281768 -1.119643 | C -3.239038 -1.513617 2.421504  |
| C 0.208611 -0.968289 3.232431   | O 0.503077 0.305936 -1.539153   | C 1.782175 -1.344786 5.188470   | H -4.998020 -2.085629 -2.382422 | C -0.617670 -2.156668 -2.266945 |
| C 1.101868 -1.743530 2.468919   | O 0.593458 1.142923 0.895518    | C 0.516702 -1.138380 4.631469   | H -4.415961 -3.700554 -2.816504 | C 0.767522 -2.266538 -2.782690  |
| C 2.385625 -2.023118 2.945697   | C -5.042710 -2.624673 -1.310772 | C -2.326676 -1.593051 3.378321  | C -5.569728 1.527406 -0.524031  | C 1.360709 -1.238834 -3.537996  |
| C 2.796298 -1.537858 4.194315   | H -5.385507 -2.732739 -0.275243 | C -3.318356 -1.376531 2.421520  | H -5.836821 0.839175 -1.333613  | C 2.630213 -1.413631 -4.097090  |
| C 1.911597 -0.773955 4.965316   | H -5.619870 -1.810466 -1.762358 | C -0.697725 -2.152533 -2.262213 | H -5.911758 1.074738 0.413609   | C 3.325790 -2.616473 -3.912497  |
| C 0.626449 -0.494653 4.490197   | H -5.286651 -3.547770 -1.842643 | C 0.683151 -2.320988 -2.773195  | H -6.128626 2.455169 -0.671503  | C 2.740993 -3.647921 -3.168454  |
| C -2.346676 -0.790508 3.542447  | C -5.360464 2.356687 -0.613243  | C 1.327295 -1.316490 -3.517656  | C -4.801934 -1.526398 2.555935  | C 1.466828 -3.476180 -2.614169  |
| C -3.405005 -0.577051 2.662611  | H -5.797265 1.651716 -1.328489  | C 2.588913 -1.547328 -0.474333  | H -5.045620 -1.890935 3.557015  | C -1.688385 -2.969243 -2.690035 |
| C -1.355265 -2.469661 -1.765242 | H -5.735038 2.088881 0.380871   | C 3.225973 -2.783273 -3.897383  | H -5.322846 -0.573147 2.410095  | C -2.810262 -2.538835 -1.987083 |
| C -0.024315 -2.968919 -2.177867 | H -5.728650 3.356834 -0.854389  | C 2.590436 -3.791522 -3.163312  | H -5.208713 -2.235924 1.827316  | C -2.201101 2.717323 -0.518827  |
| C 0.845889 -2.230550 -3.001082  | C -4.876861 -0.572134 2.937040  | C 1.323956 -3.563790 -2.611934  | C 3.711316 1.868454 0.607094    | C -1.158973 3.757239 -0.593659  |
| C 2.065777 -2.778272 -3.412768  | H -5.054654 -0.778555 3.995415  | C -1.798490 -2.922851 -2.688253 | C 5.238948 2.085744 0.805342    | C 0.079766 3.528414 -1.223467   |
| C 2.434235 -4.069734 -3.015368  | H -5.332385 0.396797 2.702410   | C -2.905312 -2.449035 -1.989791 | C 5.969069 0.742450 1.002378    | C 1.029546 4.552682 -1.310145   |
| C 1.571196 -4.816720 -2.204204  | H -5.405671 -1.332072 2.350884  | C -2.072365 2.780092 -0.546911  | C 5.689789 -0.231272 -0.159928  | C 0.760971 5.819395 -0.776340   |
| C 0.350340 -4.272568 -1.792969  | C 4.565358 1.546980 0.009085    | C -0.985969 3.772162 -0.635748  | C 4.163228 -0.438545 -0.370135  | C -0.469022 6.056407 -0.149840  |
| C -2.571363 -3.167214 -1.945923 | C 6.055483 1.638885 0.398122    | C 0.239089 3.481680 -1.266408   | C 3.470870 0.905200 -0.546732   | C -1.419917 5.035911 -0.060086  |
| C -3.568627 -2.373363 -1.390272 | C 6.585793 0.285384 0.915628    | C 1.232662 4.461880 -1.367997   | H 3.218525 2.832852 0.430081    | C -3.598353 2.928918 -0.584229  |
| C -1.686590 2.878873 -0.857099  | C 6.337831 -0.845890 -0.104111  | C 1.021681 5.745335 -0.848375   | H 3.304496 1.449397 1.538986    | C -4.186359 1.672729 -0.490148  |
| C -0.442109 3.654948 -1.038159  | C 4.847609 -0.935941 -0.492256  | C -0.194408 6.043534 -0.220857  | H 5.647402 2.599935 -0.077062   | H 1.078406 1.736987 0.984437    |
| C 0.548231 3.292295 -1.969582   | C 4.315872 0.416110 -1.010710   | C -1.188903 5.067006 -0.116333  | H 5.406705 2.745260 1.666872    | H -4.380682 -1.117665 -0.157648 |
| C 1.681039 4.095451 -2.143266   | H 4.218039 2.506681 -0.397046   | C -3.459170 3.052236 -0.606718  | H 7.049751 0.912695 1.099568    | H 1.190879 -2.365582 1.486721   |
| C 1.838120 5.270845 -1.398179   | H 3.969692 1.352137 0.914687    | C -4.101612 1.823833 -0.503290  | H 5.634477 0.285555 1.945940    | H 3.448129 -2.662384 2.463914   |
| C 0.851538 5.644589 -0.477131   | H 6.640887 1.942287 -0.483933   | H 1.208470 1.606279 1.001228    | H 6.128127 0.170590 -1.085462   | H 3.890036 -1.990273 4.820343   |
| C -0.282205 4.845912 -0.301623  | H 6.202851 2.418415 1.157738    | H -4.424705 -0.952491 -0.171377 | H 6.171165 -1.200594 0.026265   | H 2.051991 -1.017345 6.190736   |
| C -2.991336 3.406682 -0.906980  | H 7.657110 0.360573 1.146444    | H 1.079325 -2.421835 1.524826   | H 3.986505 -1.086076 -1.236233  | H -0.201652 -0.706169 5.206308  |
| C -3.864739 2.347028 -0.667427  | H 6.075335 0.037178 1.859002    | H 3.324430 -2.775024 2.508417   | H 3.752431 -0.949937 0.512870   | H -2.350355 -2.074434 4.371604  |
| H 1.287378 1.586002 0.380253    | H 6.935670 -0.653188 -1.008652  | H 3.782669 -2.091483 4.858880   | H 3.670105 1.361541 -1.526224   | H 0.827988 -0.306324 -3.676033  |
| H -4.710580 -0.240865 0.116482  | H 6.683967 -1.805468 0.303521   | H 1.973187 -1.047589 6.214733   | H 2.159645 0.638657 -0.734836   | H 3.074942 -0.613023 -4.679737  |
| H 0.785281 -2.136471 1.508196   | H 4.695916 -1.717454 -1.248783  | H -0.266291 -0.672187 5.220877  | <sup>3</sup> TS <sub>H,a</sub>  | H 4.310392 -2.749663 -4.349822  |
| H 3.061570 -2.625173 2.346850   | H 4.262699 -1.234766 0.391318   | H -2.470223 -1.943318 4.387622  | Fe -0.208578 0.071077 0.042125  | H 3.269965 -4.584723 -3.023877  |
| H 3.793354 -1.756231 4.563299   | H 4.824615 0.664835 -1.955627   | H 0.840814 -0.358183 -3.648081  | N -2.641182 -1.085157 1.275023  | H 1.009555 -4.279787 -2.045007  |
| H 2.221995 -0.393206 5.933228   | H 3.244506 0.338073 -1.235684   | H 3.073365 -0.764066 -4.648810  | N -1.292917 -0.983299 1.454458  | H -1.646551 -3.749099 -3.433066 |
| H -0.051954 0.109216 5.084517   | <sup>5</sup> TS <sub>H,a</sub>  | H 4.204759 -2.959513 -4.332515  | N -2.410227 -1.519043 -1.176153 | H 0.299934 2.549557 -1.634609   |
| H -2.416618 -1.019828 4.593429  | Fe -0.211911 0.041175 0.042163  | H 3.074072 -4.753286 -3.024033  | N -1.070697 -1.276881 -1.337343 | H 1.976737 4.361989 -1.805628   |
| H 0.569012 -1.229820 -3.304960  | N -2.693712 -0.998399 1.271258  | H 0.827108 -4.349195 -2.050564  | N -3.171368 0.764494 -0.372739  | H 1.499272 6.611805 -0.848287   |
| H 2.725779 -2.196380 -4.048162  | N -1.343659 -0.953436 1.461109  | H -1.784255 -3.703673 -3.431267 | N -1.960179 1.392149 -0.389941  | H -0.686448 7.032628 0.272211   |
| H 3.381423 -4.490696 -3.337473  | N -2.468264 -1.446184 -1.177002 | H 0.413812 2.488582 -1.664535   | B -3.243891 -0.755430 -0.116928 | H -2.364530 5.222881 0.440511   |
| H 1.846658 -5.819126 -1.891942  | N -1.119959 -1.255768 -1.334008 | H 2.169312 4.223677 -1.862901   | C -1.020765 -1.370518 2.724793  | H -4.107408 3.869638 -0.718516  |

|                                     |                                |                                     |                                 |                                   |
|-------------------------------------|--------------------------------|-------------------------------------|---------------------------------|-----------------------------------|
| O 1.032860 0.429913 -1.182900       | C 0.811310 3.033485 -5.340514  | H 1.307379 -0.769519 4.328992       | C 1.906308 -1.492050 1.565533   | H -4.198584 -0.038982 3.744387    |
| O 0.478361 1.076872 1.368741        | C 0.537766 2.317318 -4.172239  | H 0.991260 0.563644 5.449639        | C 2.766293 -2.129768 0.552279   | H -4.951964 -1.635306 3.624043    |
| C -4.216864 -3.046256 -2.070012     | C -0.402583 1.237289 -1.483256 | C 2.196215 -3.045813 1.226448       | C 2.261647 -2.629271 -0.663469  | C -2.106780 2.854496 3.946865     |
| H -4.565325 -3.445916 -1.111266     | C -0.248909 0.572380 -0.272879 | H 2.071560 -2.901795 2.305187       | C 3.099151 -3.279285 -1.574915  | H -2.424717 3.885272 4.125009     |
| H -4.917960 -2.259320 -2.368946     | C 3.655038 2.639407 3.181481   | H 1.201089 -2.983206 0.771906       | C 4.457527 -3.455800 -1.285582  | H -2.915110 2.191882 4.276672     |
| H -4.272963 -3.848097 -2.810628     | C 4.725904 3.646419 3.285222   | H 2.577376 -4.056966 1.062088       | C 4.972584 -2.971024 -0.076638  | H -1.241159 2.653203 4.588029     |
| C -5.639583 1.310817 -0.518889      | C 5.853367 3.629348 2.442629   | C -1.248252 -0.264177 0.465370      | C 4.137364 -2.313568 0.830485   | C 3.183920 1.771707 0.327742      |
| H -5.872082 0.615016 -1.332698      | C 6.873959 4.572654 2.594420   | H -2.204587 -0.243274 -0.063720     | C 2.118879 -1.521642 2.963606   | C 4.468524 2.622806 0.491565      |
| H -5.964825 0.838761 0.415216       | C 6.795429 5.543904 3.600118   | H -0.930702 -1.309873 0.545902      | C 1.032079 -0.876395 3.539771   | C 5.691764 1.909406 -0.119029     |
| H -6.239161 2.213120 -0.664711      | C 5.684105 5.565865 4.452478   | H -1.417076 0.103467 1.483461       | C -2.950881 -1.950826 0.099060  | C 5.452804 1.544759 -1.598771     |
| C -4.712836 -1.736197 2.562769      | C 4.659419 4.628304 4.295448   | C 1.579116 5.311904 1.381178        | C -3.014434 -2.579041 -1.232446 | C 4.166734 0.696948 -1.770538     |
| H -4.933045 -2.118486 3.562682      | C 2.878400 2.133255 4.250338   | C 0.734895 6.530259 1.837343        | C -1.914240 -3.268290 -1.775930 | C 2.970463 1.417207 -1.144722     |
| H -5.280189 -0.808585 2.425425      | C 2.050071 1.162096 3.701853   | C 1.623066 7.627081 2.459854        | C -2.008160 -3.882915 -3.028263 | H 2.315590 2.312845 0.723237      |
| H -5.088731 -2.460218 1.831707      | C 4.855726 -1.020061 -0.384428 | C 2.745524 8.060325 1.495108        | C -3.204837 -3.826548 -3.753360 | H 3.288204 0.853015 0.918564      |
| C 3.668966 1.961980 0.520623        | C 6.118917 -0.739311 -1.088484 | C 3.590356 6.845728 1.034160        | C -4.309896 -3.154206 -3.216050 | H 4.327027 3.593160 -0.007750     |
| C 5.190459 2.195355 0.736710        | C 6.940014 0.346758 -0.731354  | C 2.686826 5.768422 0.432680        | C -4.216831 -2.537402 -1.965109 | H 4.640113 2.834892 1.555169      |
| C 5.921702 0.865994 1.009922        | C 8.148848 0.574048 -1.396442  | H 0.937151 4.566621 0.895548        | C -3.914823 -2.032586 1.123865  | H 6.584405 2.542470 -0.025810     |
| C 5.669664 -0.159906 -0.113009      | C 8.562460 -0.283874 -2.422687 | H 2.021102 4.832813 2.264087        | C -3.393522 -1.324125 2.205763  | H 5.894119 0.989695 0.450656      |
| C 4.149412 -0.385656 -0.343265      | C 7.757756 -1.373256 -2.780586 | H 0.200031 6.945189 0.969844        | H -1.008613 0.724002 -2.488778  | H 5.359707 2.468618 -2.189487     |
| C 3.454817 0.946717 -0.595993       | C 6.547341 -1.599382 -2.119683 | H -0.029115 6.202765 2.554794       | H -1.549585 0.178685 3.740019   | H 6.314678 0.996202 -2.001305     |
| H 3.173681 2.913772 0.291325        | C 4.330365 -2.288066 -0.056106 | H 1.010343 8.494187 2.740837        | H 0.290835 2.404106 -1.773320   | H 3.982057 0.501357 -2.834149     |
| H 3.242922 1.580138 1.459060        | C 3.145767 -2.049818 0.635203  | H 2.073700 7.242968 3.387502        | H 0.231409 3.372075 -4.049178   | H 4.309408 -0.274771 -1.281138    |
| H 5.614664 2.669865 -0.160362       | H 4.759952 3.192446 -2.297036  | H 2.300376 8.548030 0.614765        | H -1.526483 5.029568 -4.663372  | H 2.718980 2.318582 -1.723792     |
| H 5.338982 2.894910 1.569568        | H 1.045931 -0.655209 1.852284  | H 3.396317 8.803426 1.974545        | H -3.228890 5.696206 -2.970040  | H 1.996159 0.758408 -1.297080     |
| H 6.999500 1.045381 1.121072        | H 2.548984 4.022869 -2.011526  | H 4.345070 7.163075 0.304308        | H -3.191762 4.698462 -0.709363  | <b><sup>5</sup>IM<sub>H</sub></b> |
| H 5.569039 0.450685 1.965871        | H 3.037802 5.279467 -4.080450  | H 4.127052 6.432976 1.898598        | H -2.227928 4.610468 1.533435   | Fe -0.294967 0.047499 -0.041855   |
| H 6.124792 0.202342 -1.046674       | H 1.930909 4.657291 -6.224582  | H 2.268819 6.096479 -0.529686       | H 1.210794 -2.512569 -0.897914  | N -2.649484 -0.744571 1.529848    |
| H 6.151128 -1.117485 0.125634       | H 0.323509 2.753070 -6.268820  | H 3.387776 4.854334 0.102095        | H 2.687616 -3.652820 -2.507019  | N -1.285529 -0.738546 1.569990    |
| H 3.992689 -1.072015 -1.182908      | H -0.148406 1.477553 -4.206748 | <b><sup>3</sup>TS<sub>H,b</sub></b> | H 5.105564 -3.964518 -1.991830  | N -2.720635 -1.422150 -0.874671   |
| H 3.721772 -0.856791 0.553040       | H -1.294962 1.274826 -2.086580 | Fe -0.299084 -0.353770 -0.340688    | H 6.024516 -3.099650 0.157896   | N -1.382359 -1.342053 -1.159214   |
| H 3.690917 1.360334 -1.586507       | H 5.937941 2.871347 1.673768   | N -1.288530 1.515715 1.954016       | H 4.551115 -1.927314 1.755997   | N -3.188947 0.990320 -0.237140    |
| H 2.203752 0.698031 -0.770660       | H 7.732692 4.543358 1.931527   | N -1.073918 1.655776 0.613196       | H 2.936141 -1.990831 3.486257   | N -1.935416 1.492254 -0.434612    |
| <b><sup>5</sup>TS<sub>H,b</sub></b> | H 7.590581 6.272746 3.719364   | N 0.217593 -0.471422 2.520219       | H -0.993585 -3.339108 -1.206943 | B -3.368843 -0.486536 0.175496    |
| Fe 3.736190 2.079427 -0.137139      | H 5.612394 6.314684 5.235060   | N 0.749988 -0.827584 1.314493       | H -1.151048 -4.411039 -3.433560 | C -0.910701 -1.023828 2.841202    |
| N 1.022752 0.819398 0.165226        | H 3.794505 4.662864 4.949964   | N -2.172816 -0.847080 1.830339      | H -3.276651 -4.304542 -4.724988 | C 0.486946 -1.213630 3.262719     |
| N 1.684887 1.624292 -0.722042       | H 2.942825 2.409323 5.290319   | N -1.900509 -1.216182 0.541237      | H -5.241067 -3.106674 -3.771642 | C 1.399824 -1.922643 2.458691     |
| N 2.321892 1.112409 2.361391        | H 6.639285 1.006503 0.073830   | B -1.211381 0.113321 2.596554       | H -5.070447 -2.005736 -1.556722 | C 2.712313 -2.133873 2.891806     |
| N 3.292586 2.017249 2.035752        | H 8.767753 1.417859 -1.109225  | C -1.451939 2.915575 0.292148       | H -4.848410 -2.570716 1.093330  | C 3.131510 -1.646657 4.136634     |
| N 2.980837 -0.695525 0.706648       | H 9.501842 -0.106969 -2.936522 | C -1.447947 3.473877 -1.073351      | O 0.865167 0.283616 -1.662909   | C 2.227126 -0.949963 4.948120     |
| N 4.021032 -0.060671 0.080261       | H 8.069680 -2.042523 -3.576141 | C -0.486340 3.111345 -2.036558      | O -0.706844 -0.182265 -2.288575 | C 0.914307 -0.738101 4.516843     |
| B 1.789259 0.106376 1.314311        | H 5.920080 -2.435842 -2.411118 | C -0.519732 3.665476 -3.322186      | C 0.740156 -0.644903 4.989937   | C -2.069178 -1.189701 3.626478    |
| C 0.830591 1.877468 -1.744100       | H 4.774256 -3.248623 -0.261762 | C -1.504005 4.599369 -3.667272      | H 0.612692 0.419580 5.215716    | C -3.153670 -1.008299 2.767434    |
| C 1.162066 2.655488 -2.952989       | O 4.088991 4.022373 -0.492664  | C -2.458798 4.975185 -2.713860      | H -0.173144 -1.157450 5.312200  | C -1.091565 -2.364826 -2.003523   |
| C 2.066019 3.735271 -2.938861       | O 5.135940 2.916659 -1.443601  | C -2.433232 4.417402 -1.432555      | H 1.569414 -1.020922 5.594772   | C 0.238996 -2.704670 -2.563726    |
| C 2.341511 4.446841 -4.112754       | C 1.044534 0.292529 4.391968   | C -1.895540 3.587619 1.457479       | C -4.001236 -1.100427 3.555958  | C 0.905526 -1.865380 -3.474146    |
| C 1.716759 4.101765 -5.317162       | H 0.042342 0.405245 3.963826   | C -1.782505 2.672782 2.495468       | H -3.350664 -1.459081 4.360798  | C 2.115001 -2.265959 -4.050383    |

|                                 |                                 |                                 |                                 |                                 |
|---------------------------------|---------------------------------|---------------------------------|---------------------------------|---------------------------------|
| C 2.677094 -3.508616 -3.727593  | H -5.121331 -0.130107 2.901435  | C -3.321402 -2.429468 -1.541849 | C 6.252161 0.622759 0.999563    | C 1.748430 -0.525759 4.986286   |
| C 2.017413 -4.354651 -2.828732  | H -5.123008 -1.838425 2.455502  | C -2.034971 2.839857 -0.653227  | C 6.055835 -0.399153 -0.138813  | C 2.371333 0.474652 5.743425    |
| C 0.802564 -3.957876 -2.257202  | C 4.194599 1.960594 0.167221    | C -0.903705 3.745581 -0.923075  | C 4.559382 -0.472132 -0.574188  | C 3.298955 1.327962 5.132453    |
| C -2.269405 -3.097407 -2.254836 | C 5.685493 2.047463 0.618455    | C 0.231576 3.327321 -1.644293   | C 4.032637 0.902794 -0.874873   | C 3.595634 1.188176 3.773049    |
| C -3.283500 -2.475230 -1.532119 | C 6.225415 0.658217 1.014548    | C 1.273559 4.224282 -1.905860   | H 3.888315 2.938012 -0.162737   | C 4.612115 0.094171 1.007471    |
| C -2.067769 2.819400 -0.663415  | C 6.058629 -0.366980 -0.125653  | C 1.199440 5.550355 -1.461198   | H 3.640971 1.702866 1.079732    | C 4.446809 -0.180301 -0.345481  |
| C -0.947913 3.739547 -0.931978  | C 4.569070 -0.462137 -0.579456  | C 0.071879 5.976045 -0.747686   | H 6.323675 2.416196 -0.223051   | H 0.044578 0.380132 2.712156    |
| C 0.195255 3.334894 -1.648458   | C 4.025427 0.904398 -0.888440   | C -0.969698 5.082867 -0.481454  | H 5.840185 2.719709 1.449907    | H 3.170448 -0.900990 -2.742416  |
| C 1.225840 4.245207 -1.909039   | H 3.845286 2.938891 -0.182526   | C -3.401602 3.199614 -0.595940  | H 7.315178 0.683761 1.268915    | H 0.478711 3.114460 0.649926    |
| C 1.132387 5.571271 -1.468063   | H 3.597492 1.702678 1.059011    | C -4.101396 2.029068 -0.324878  | H 5.717980 0.272252 1.896052    | H -0.846783 4.861576 1.796236   |
| C -0.003107 5.983445 -0.759207  | H 6.287340 2.451909 -0.208006   | H 1.262255 1.660179 0.560463    | H 6.666991 -0.104335 -1.004009  | H -2.520173 6.199818 0.525714   |
| C -1.033349 5.076925 -0.493972  | H 5.776442 2.749042 1.457940    | H -4.541459 -0.688138 0.289434  | H 6.398766 -1.394216 0.174182   | H -2.865165 5.758066 -1.901298  |
| C -3.439258 3.161014 -0.610947  | H 7.283875 0.734926 1.297475    | H 1.048437 -2.348804 1.492291   | H 4.443067 -1.143108 -1.432711  | H -1.561615 3.986383 -3.040475  |
| C -4.124281 1.981790 -0.339700  | H 5.684821 0.300433 1.904242    | H 3.374307 -2.739126 2.244631   | H 3.992888 -0.916583 0.261975   | H 0.722364 3.275577 -4.002320   |
| H 1.245719 1.682146 0.559563    | H 6.676317 -0.063577 -0.983187  | H 4.136039 -1.880098 4.454794   | H 3.881802 1.203894 -1.910391   | H -0.972367 -2.145176 1.569208  |
| H -4.530845 -0.737627 0.283209  | H 6.412046 -1.356766 0.192288   | H 2.547172 -0.624017 5.903935   | H 1.762721 0.385432 -1.110778   | H -2.904330 -2.884302 2.903667  |
| H 1.074747 -2.324934 1.504470   | H 4.472715 -1.135706 -1.438365  | H 0.225679 -0.211956 5.138382   | <sup>5</sup> PC                 | H -4.484635 -4.588826 2.005030  |
| H 3.402571 -2.688366 2.264002   | H 3.999003 -0.913630 0.250494   | H -2.120616 -1.457036 4.666732  | Fe 0.139375 0.040750 0.281184   | H -4.104622 -5.541498 -0.266688 |
| H 4.149669 -1.814031 4.473160   | H 3.880531 1.201021 -1.926048   | H 0.461817 -0.909599 -3.725616  | N 1.590501 0.628407 -2.298007   | H -2.172768 -4.795980 -1.618270 |
| H 2.544073 -0.569492 5.913925   | H 1.763520 0.412348 -1.109333   | H 2.591838 -1.646324 -4.760150  | N 0.790698 1.266725 -1.392324   | H 0.210279 -4.871530 -2.133551  |
| H 0.220163 -0.185174 5.141566   | <sup>3</sup> IM <sub>H</sub>    | H 3.566454 -3.861091 -4.173264  | N 1.412056 -1.862037 -1.736508  | H 1.584662 -1.463338 3.048898   |
| H -2.110907 -1.454697 4.670490  | Fe -0.295893 0.043787 -0.041575 | H 2.374658 -5.346949 -2.566775  | N 0.356163 -1.829755 -0.868935  | H 1.038044 -1.199860 5.454333   |
| H 0.481189 -0.899158 -3.713034  | N -2.657503 -0.723561 1.531234  | H 0.225678 -4.616792 -1.563035  | N 3.109105 -0.389312 -0.552780  | H 2.140207 0.584623 6.798029    |
| H 2.617671 -1.608777 -4.753049  | N -1.293525 -0.732770 1.568567  | H -2.423489 -3.914945 -2.918911 | N 2.413322 -0.251240 0.614472   | H 3.786901 2.105158 5.712261    |
| H 3.616256 -3.815738 -4.177176  | N -2.742830 -1.390085 -0.876254 | H 0.299870 2.301422 -1.989794   | B 2.373118 -0.651146 -1.889761  | H 4.305818 1.859730 3.300867    |
| H 2.441959 -5.321200 -2.575965  | N -1.403312 -1.329115 -1.159148 | H 2.139880 3.887246 -2.467096   | C 0.353569 2.405298 -1.976486   | H 5.542510 0.271369 1.523072    |
| H 0.286603 -4.618184 -1.566745  | N -3.178968 1.025146 -0.227074  | H 2.008420 6.243638 -1.668765   | C -0.455921 3.414814 -1.275190  | O -2.013243 0.062169 -0.682360  |
| H -2.363753 -3.955999 -2.899723 | N -1.919343 1.510700 -0.426927  | H 0.005443 7.000246 -0.394165   | C -0.264617 3.677385 0.095622   | O -0.594948 0.250341 1.996129   |
| H 0.278688 2.309122 -1.990965   | B -3.376671 -0.450916 0.179791  | H -1.831851 5.416068 0.087366   | C -1.008080 4.671183 0.739919   | C 2.526994 -3.454964 -3.361360  |
| H 2.098433 3.918465 -2.466640   | C -0.919261 -1.029599 2.837457  | H -3.823414 4.177076 -0.765226  | C -1.947197 5.425593 0.025513   | H 2.506801 -2.801369 -4.240451  |
| H 1.932589 6.274889 -1.674846   | C 0.477072 -1.236659 3.255398   | O 0.861988 0.174683 -1.429325   | C -2.138874 5.178348 -1.340220  | H 3.536710 -3.401110 -2.939701  |
| H -0.084572 7.007538 -0.408525  | C 1.380213 -1.953050 2.446946   | O 0.672389 1.082543 1.074415    | C -1.399758 4.182764 -1.985301  | H 2.356754 -4.480437 -3.699510  |
| H -1.901687 5.399901 0.071323   | C 2.691456 -2.179612 2.876062   | C -4.778690 -2.766584 -1.469927 | C 0.865627 2.478455 -3.290697   | C 5.487175 -0.262994 -1.420132  |
| H -3.873549 4.132410 -0.783524  | C 3.118828 -1.701027 4.121436   | H -5.086094 -3.041299 -0.454713 | C 1.649410 1.340635 -3.462983   | H 5.505844 -1.248760 -1.898467  |
| O 0.864828 0.190032 -1.426762   | C 2.223874 -0.997611 4.937550   | H -5.407717 -1.926907 -1.785016 | C -0.251009 -3.039908 -0.936438 | H 5.321065 0.478422 -2.210188   |
| O 0.659257 1.101210 1.073494    | C 0.912400 -0.770127 4.510123   | H -4.990889 -3.613449 -2.127438 | C -1.420139 -3.424687 -0.124947 | H 6.474879 -0.078383 -0.989371  |
| C -4.735359 -2.834389 -1.456917 | C -2.077971 -1.187028 3.624037  | C -5.577924 1.830921 -0.169831  | C -1.645655 -2.891085 1.159712  | C 2.444426 0.924694 -4.662291   |
| H -5.038658 -3.104130 -0.439162 | C -3.162108 -0.989055 2.768189  | H -5.968730 1.094444 -0.880573  | C -2.746910 -3.307203 1.916515  | H 2.305876 1.653874 -5.464795   |
| H -5.377420 -2.007725 -1.780076 | C -1.127620 -2.349945 -2.010572 | H -5.842970 1.485051 0.835842   | C -3.635194 -4.264880 1.412306  | H 3.516320 0.862204 -4.443375   |
| H -4.934180 -3.690724 -2.106302 | C 0.199512 -2.707343 -2.568492  | H -6.095442 2.777536 -0.345628  | C -3.419371 -4.802435 0.136306  | H 2.132067 -0.055387 -5.039947  |
| C -5.598654 1.764620 -0.189725  | C 0.875741 -1.879201 -3.481917  | C -4.625709 -1.054964 3.075948  | C -2.324559 -4.385677 -0.625114 | C -3.554993 1.623547 0.359461   |
| H -5.977508 1.023617 -0.902268  | C 2.081511 -2.295020 -4.055127  | H -4.769365 -1.326997 4.124601  | C 0.430394 -3.849158 -1.872603  | C -4.869662 1.782343 1.153213   |
| H -5.862806 1.414792 0.814776   | C 2.630082 -3.542092 -3.726140  | H -5.120723 -0.091720 2.907798  | C 1.480776 -3.077901 -2.357979  | C -6.047000 1.081862 0.444566   |
| H -6.127555 2.704661 -0.366882  | C 1.960632 -4.377072 -2.824208  | H -5.140137 -1.798909 2.458065  | C 3.318510 0.031986 1.576085    | C -5.727356 -0.399321 0.158746  |
| C -4.617122 -1.088060 3.072630  | C 0.749427 -3.964957 -2.255677  | C 4.229337 1.954569 0.180633    | C 2.968632 0.191839 2.999089    | C -4.407413 -0.548527 -0.628864 |
| H -4.760092 -1.359081 4.121647  | C -2.316444 -3.062156 -2.268332 | C 5.727335 2.020068 0.611420    | C 2.047734 -0.670860 3.626741   | C -3.255065 0.145994 0.109420   |

|                                 |                                 |                                 |
|---------------------------------|---------------------------------|---------------------------------|
| H -2.720213 2.079823 0.899157   | C 3.949011 -1.475465 -1.767788  | H -6.758881 -0.122296 -0.922452 |
| H -3.640406 2.136249 -0.608722  | C 4.258701 -0.593067 -0.739402  | H -6.081946 -0.422655 0.679197  |
| H -4.743183 1.351907 2.158021   | H 0.049700 -0.621757 -2.572493  | H -5.114689 1.689877 -1.333159  |
| H -5.088674 2.848155 1.293718   | H 3.930510 0.968180 1.550818    | H -5.954649 2.006279 0.183515   |
| H -6.957394 1.159595 1.053105   | H -0.398727 -3.125004 1.143208  | H -3.477471 2.380461 0.391481   |
| H -6.254965 1.596496 -0.505752  | H -2.378897 -4.612932 1.258337  | H -4.031113 1.098332 1.485879   |
| H -5.642709 -0.944713 1.110400  | H -4.045601 -4.334837 3.086852  | H -2.669049 0.663531 -1.231378  |
| H -6.547273 -0.867634 -0.400189 | H -3.721122 -2.546740 4.790266  | H -1.424143 1.308853 0.756636   |
| H -4.175631 -1.612407 -0.775875 | H -1.747187 -1.050771 4.661915  |                                 |
| H -4.514875 -0.091471 -1.623445 | H 0.955928 -1.157513 4.992013   |                                 |
| H -3.064461 -0.357442 1.064548  | H -0.776363 1.857738 -2.141898  |                                 |
| H -1.991843 -0.812614 -1.105967 | H -2.754201 2.638904 -3.410433  |                                 |
| <b><sup>3</sup>PC</b>           | H -3.713936 4.899247 -2.987566  |                                 |
| Fe 0.191965 -0.276458 -0.187729 | H -2.668620 6.377936 -1.275064  |                                 |
| N 1.986312 -0.002504 2.117394   | H -0.687213 5.607355 -0.011828  |                                 |
| N 0.811199 -0.595907 1.750176   | H 1.707131 5.215261 0.099294    |                                 |
| N 2.192765 2.031714 0.614229    | H 2.916505 -2.061734 -4.380030  |                                 |
| N 0.978778 1.994468 -0.006662   | H 1.696797 -3.641449 -5.848297  |                                 |
| N 3.080925 -0.231972 -0.146134  | H -0.171541 -5.010570 -4.931040 |                                 |
| N 2.028098 -0.846139 -0.769057  | H -0.796976 -4.791692 -2.531493 |                                 |
| B 2.869107 0.717834 1.063598    | H 0.434664 -3.220819 -1.062857  |                                 |
| C 0.268147 -1.132399 2.869207   | H 4.645150 -1.981994 -2.416625  |                                 |
| C -0.941899 -1.972844 2.884212  | O -1.638891 0.381198 0.554009   |                                 |
| C -1.135134 -2.987048 1.927663  | O -0.568686 -0.339400 -1.882855 |                                 |
| C -2.247725 -3.831063 1.999774  | C 3.943084 3.705317 1.372784    |                                 |
| C -3.184360 -3.676894 3.029388  | H 4.008054 3.394222 2.421700    |                                 |
| C -2.999768 -2.672736 3.989006  | H 4.796612 3.259465 0.849613    |                                 |
| C -1.886052 -1.830463 3.919638  | H 4.058713 4.791995 1.338244    |                                 |
| C 1.099743 -0.841942 3.971223   | C 5.605389 -0.103908 -0.304049  |                                 |
| C 2.181870 -0.127792 3.462144   | H 5.690836 0.985733 -0.383472   |                                 |
| C 0.645743 3.278377 -0.278526   | H 5.823593 -0.372531 0.735431   |                                 |
| C -0.576202 3.684590 -0.996594  | H 6.377433 -0.548267 -0.937708  |                                 |
| C -1.178933 2.851093 -1.960118  | C 3.371311 0.414368 4.192788    |                                 |
| C -2.304475 3.290892 -2.667469  | H 3.307141 0.143164 5.249767    |                                 |
| C -2.844922 4.561248 -2.431695  | H 4.311622 0.016533 3.796220    |                                 |
| C -2.254478 5.393739 -1.471565  | H 3.427512 1.507113 4.129303    |                                 |
| C -1.132148 4.959952 -0.760940  | C -3.461041 -1.053876 -0.196371 |                                 |
| C 1.665509 4.141769 0.191116    | C -4.812644 -1.105511 -0.941964 |                                 |
| C 2.636779 3.320139 0.748193    | C -5.826043 -0.108183 -0.343904 |                                 |
| C 2.544738 -1.624826 -1.751027  | C -5.249886 1.322272 -0.305424  |                                 |
| C 1.759353 -2.524426 -2.616377  | C -3.891338 1.363419 0.427974   |                                 |
| C 2.109439 -2.663676 -3.974588  | C -2.911406 0.370397 -0.206866  |                                 |
| C 1.417677 -3.552351 -4.803213  | H -2.735638 -1.724842 -0.666664 |                                 |
| C 0.366061 -4.320633 -4.288593  | H -3.596069 -1.382091 0.842190  |                                 |
| C 0.013025 -4.194994 -2.938815  | H -4.652125 -0.868191 -2.004270 |                                 |
| C 0.704710 -3.308363 -2.108838  | H -5.215298 -2.125434 -0.904951 |                                 |
